# Supplementary material for: Methylation Markers of Early-Stage Non-Small Cell Lung Cancer
Source: PLOS journal article supplement (doi:10.1371/journal.pone.0039813), 2012-06-29

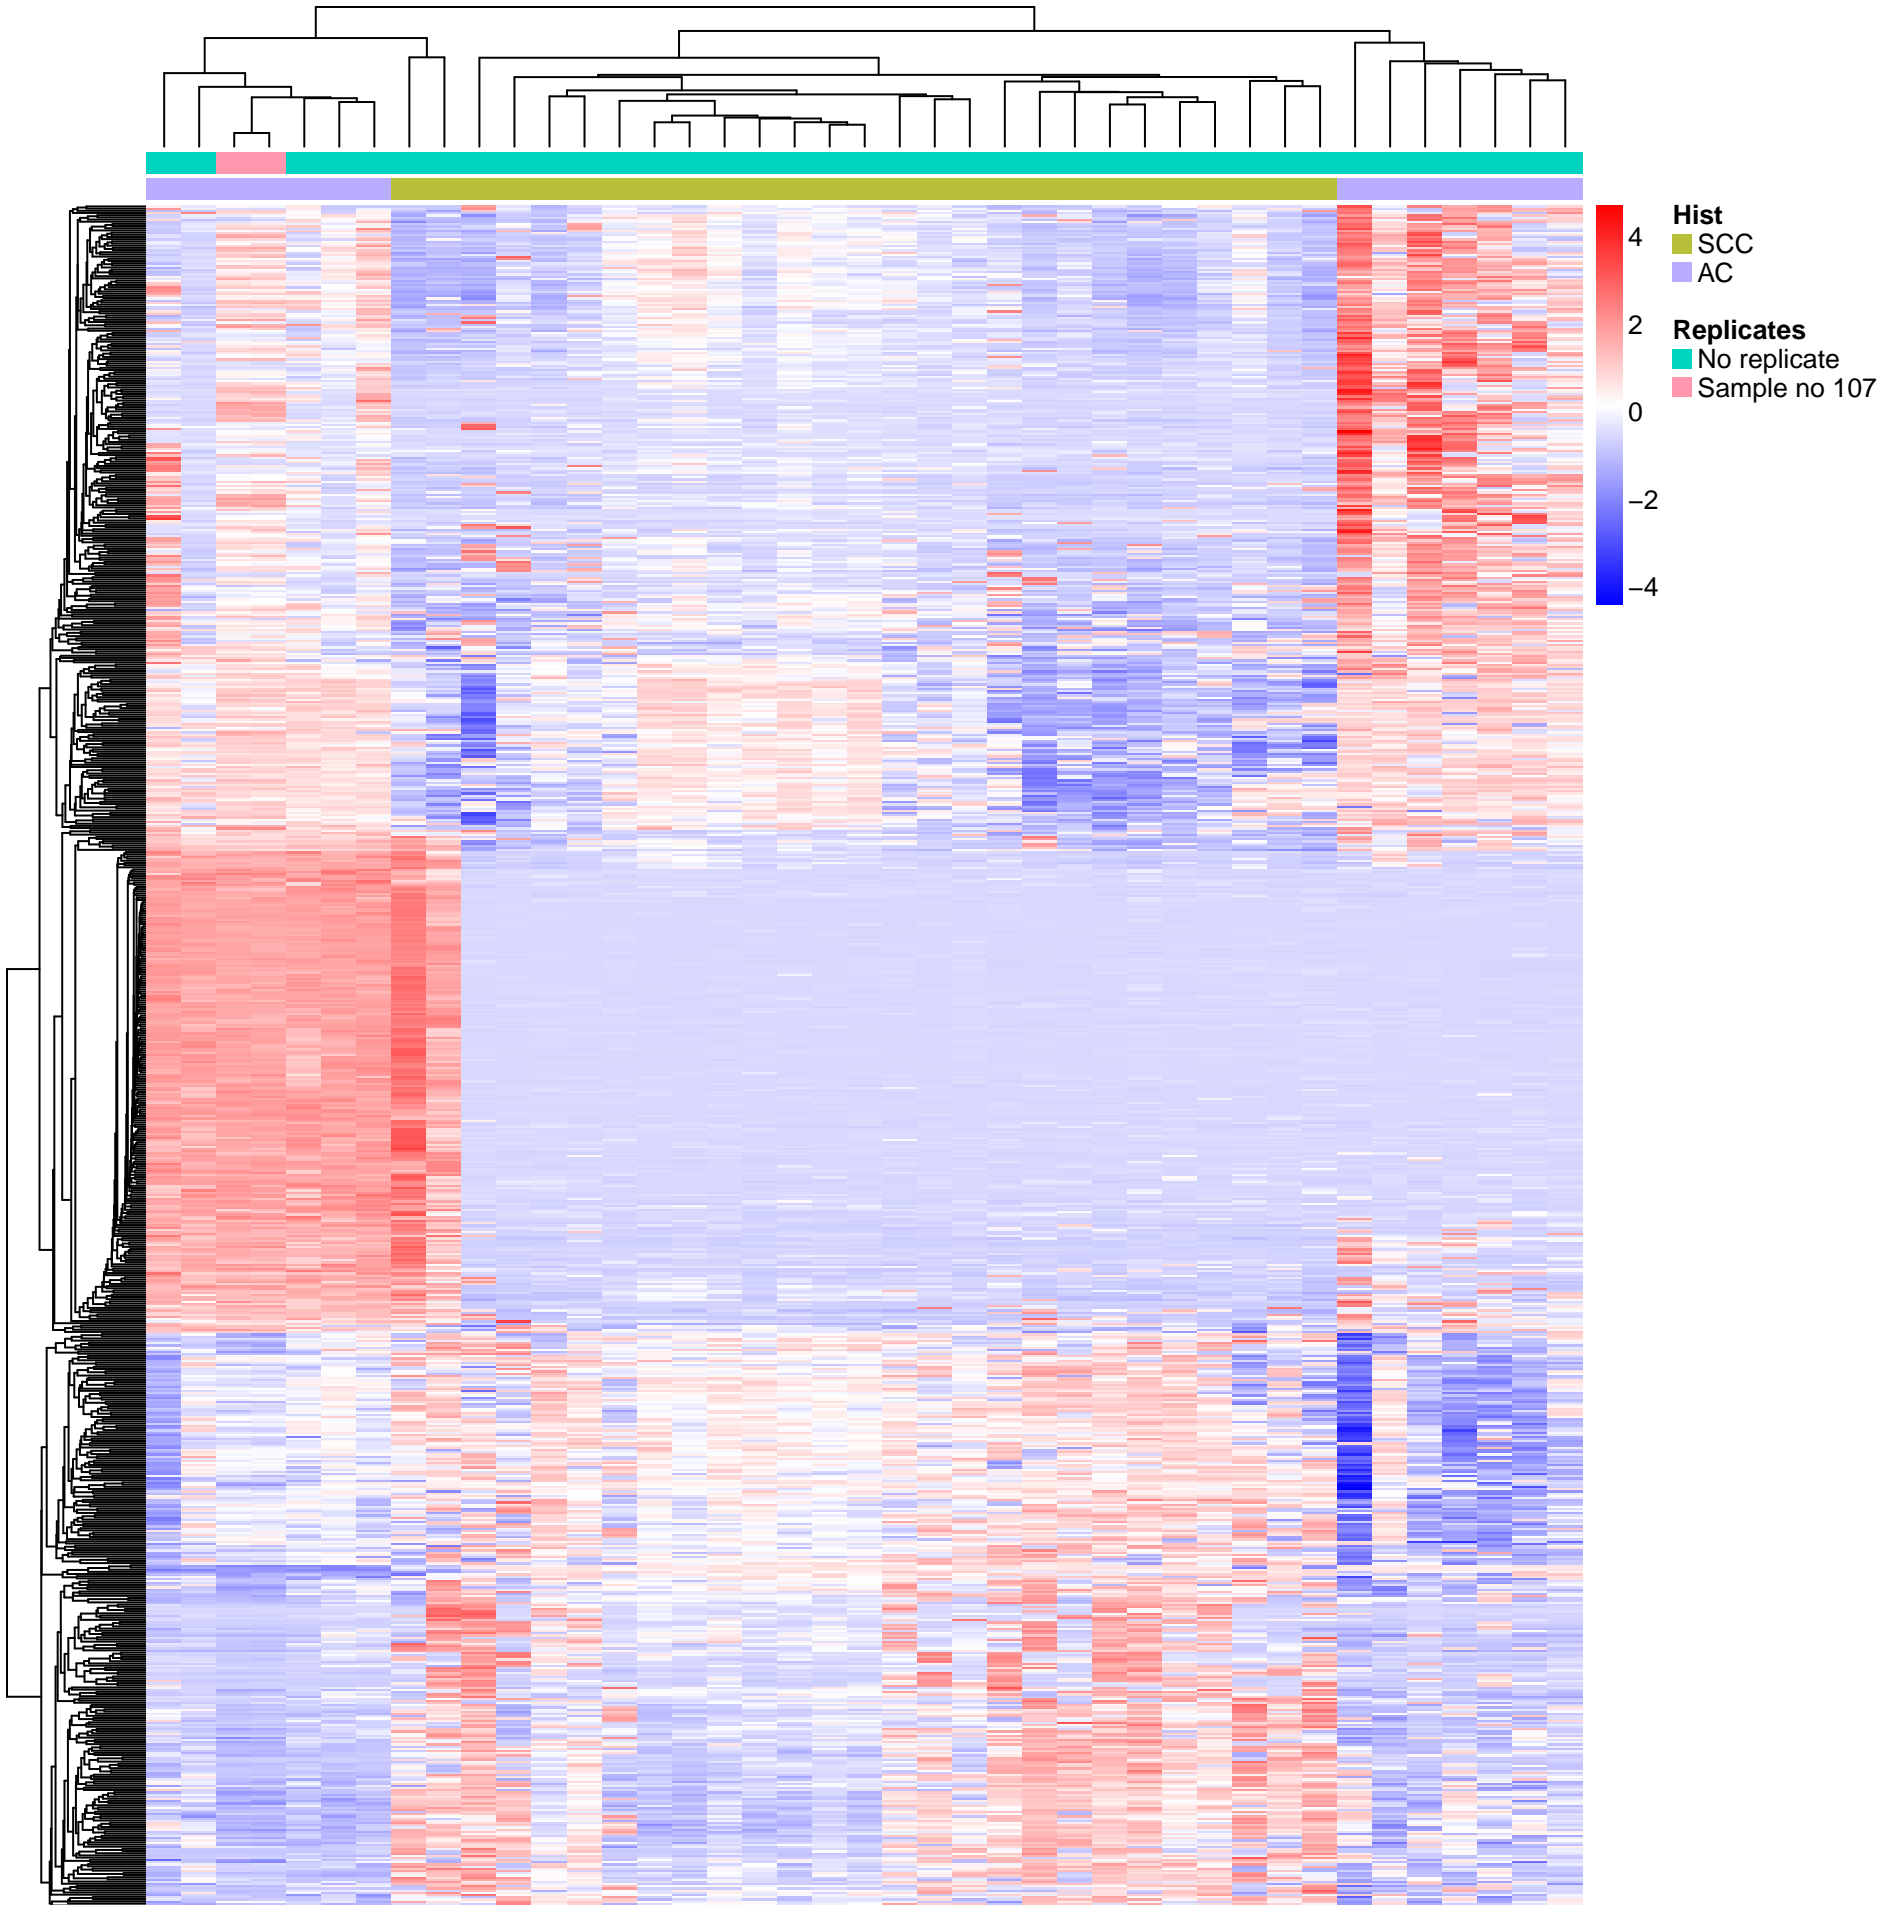

Supplement: S2 (10.1371/journal.pone.0039813.s002) [file journal.pone.0039813.s002]
