# Supplementary material for: Methylation Markers of Early-Stage Non-Small Cell Lung Cancer
Source: PLoS One. 2012 Jun 29;7(6):e39813. doi: 10.1371/journal.pone.0039813 (PMC3387223; doi:10.1371/journal.pone.0039813)
Supplement: Table S1 — Differentially methylated CpGs and genes in stage I NSCLC compared to cancer-free lung control samples. Mean Beta represents the methylated signals divided by the sum of methylated and unmethylated signals for each analyzed CpG. Beta-diff. was calculated by subtracting the Mean Beta value of a cancer-free lung from the Mean Beta value of stage I NSCLC samples. (XLS) [file pone.0039813.s007.xls]

## Sheet: Sheet1
Supplementary Table 3. Differentially methylated CpG-s and genes in stage I NSCLC samples compared to cancer-free lung control samples.
Mean Beta represents the methylated divided by the sum of methylated and unmethylated signals for each analyzed CpG. Delta Beta was calculated by subtracting the Mean Beta value of cancer-free lung from Mean Beta value of stage I NSCLC samples
NA=information not available
Symbol	AddressA_ID	Chr	MapInfo	SourceSeq	Gene_ID	Accession	TSS_Coordinate	Distance_to_TSS+-	Delta Beta	adj.P.Val	Pearson R	R square	Mean Beta tumor	Mean Beta normal lung	Mean exp. tumor	Mean exp. normal lung
HOXA9	1980390	7	27171506	CGGCGCATAGCGGCCAACGCTCAGCTCATCCGCGGCGTCGGCGCCCAGCA	GeneID:3205	NM_152739.2	27171674	168	0.393212	2.79799e-14	0.0794563	0.00631331	0.589505	0.196293	316.591	307.816
HOXA9	6350154	7	27171328	CAACGCTGTACCCGCTGCGGTGTACCACCACCATCACCACCACCCCTACG	GeneID:3205	NM_152739.2	27171674	346	0.354505	1.1921e-11	0.0309958	0.000960738	0.537937	0.183431	316.591	307.816
TRIM58	20706	1	246087435	CCGGCAGCTGGCGGGCCTGGTGGAGAGCGTGCGGCGGCTGGGGTTGGGCG	GeneID:25893	NM_015431.2	246087124	311	0.342492	5.08076e-08	NA	NA	0.451698	0.109206	NA	NA
HOXA9	990673	7	27171310	CGGGCGCCTGGGGGTGCACGTAGGGGTGGTGGTGATGGTGGTGGTACACC	GeneID:3205	NM_152739.2	27171674	364	0.337182	6.18731e-11	0.0286696	0.000821947	0.594284	0.257102	316.591	307.816
NID2	1940110	14	51605897	CGCTGAGCTCATCTCCTGCAACGCCGCTGCCCCAAACCTTGCGGGCCATT	GeneID:22795	NM_007361.2	51605696	-201	0.336185	6.84324e-07	0.00376011	1.41385e-05	0.47009	0.133906	877.831	661.887
DGKI	4880630	7	137182914	CTAAGTGGTTTGAAGCCCCTTCCGGGATGCCTCTTCTTATACGAACAACG	GeneID:9162	NM_004717.2	137182149	-765	0.314304	9.11915e-08	0.134175	0.0180029	0.469421	0.155117	440.879	408.36
PTGDR	4010014	14	51804279	CGCCATGAAGTCGCCGTTCTACCGCTGCCAGAACACCACCTCTGTGGAAA	GeneID:5729	NM_000953.2	51804181	98	0.313747	1.40132e-05	-0.148297	0.0219919	0.404675	0.0909283	438.915	461.327
HOXD9	4070112	2	176695650	CCCCAGTTTAGCGGACTGATTTACTCCCGGTATTGGTAAATATGATCACG	GeneID:3235	NM_014213.2	176695334	316	0.307619	2.02714e-05	-0.20498	0.0420168	0.430698	0.123079	331.291	326.636
ZNF154	3140228	19	62912306	CGCCTTCGTGGCCCCAACTCGGCGCTCTGCTATCTCTGATCCGGTGAACA	GeneID:7710	NM_003444.1	62912374	68	0.287002	0.000415958	-0.413107	0.170658	0.349874	0.0628713	399.41	440.312
DRD4	7100364	11	627170	TCCCTGCGCAAAATTCCAAGATGAGCAAATACTGGGCTCACGGTGGAGCG	GeneID:1815	NM_000797.2	627305	-135	0.28445	0.000149382	NA	NA	0.3339	0.0494501	NA	NA
NEF3	7380497	8	24827371	CGCAGCATGCTCGCCCCGCGCCTCGCTTACAGCTCGGCCATGCTCAGCTC	GeneID:4741	NM_005382.1	24827212	159	0.282578	1.56264e-07	-0.0947693	0.00898123	0.430019	0.14744	420.392	381.138
PRAC	460711	17	44154639	CTCTAATAAGGTAAACTGATCGGTGGGCCAAGGGCGTTATCGACGGATCG	GeneID:84366	NM_032391.2	44154881	242	0.282305	2.54005e-05	-0.0158774	0.000252092	0.430702	0.148397	365.446	332.05
ZNF577	6040482	19	57083062	CGGAATACGGCACCAGCCGTCCCTTTATGATGCAATATGTCTGCGCCCAG	GeneID:84765	NM_032679.1	57083009	-53	0.281572	0.000110098	NA	NA	0.461789	0.180217	NA	NA
TRH	650239	3	131176303	CAGGAGTGGGCTCCACAGGATGGGTCCGGGATCCGGGGACTCGGGATCCG	GeneID:7200	NM_007117.1	131176253	50	0.281244	5.1253e-05	-0.0614981	0.00378202	0.43834	0.157096	344.786	337.193
SLC6A2	110730	16	54248065	GAAGCATGGATGCGGCTGGCGAGAGGAACTTTACCGGTCCTGGGGGCACG	GeneID:6530	NM_001043.2	54248057	8	0.277912	4.2893e-08	0.263463	0.0694128	0.435149	0.157237	328.61	307.007
SIX6	3170687	14	60046038	ATATGATAGAGCTCGCGGTAGTTGCCACCGTGAAAGGCCACGATGGCTCG	GeneID:4990	NM_007374.1	60045775	263	0.276411	7.13855e-06	0.0108793	0.000118359	0.354706	0.078295	315.288	305.041
WDR8	1410615	1	3557410	GGCCAGGCGGGGATGTCAGGGTCTGCGCGATCTGGGGGGCCCTAGAGGCG	GeneID:49856	NM_017818.2	3556497	-913	0.274988	1.4855e-06	NA	NA	0.438283	0.163295	NA	NA
NEUROG1	4070632	5	134899065	TCCCGGGCGTCTGAGGTTCCAGGGGCACAGGACGACGAGCAGGAGAGGCG	GeneID:4762	NT_034772.5	NA	NA	0.273425	1.08584e-08	0.0276063	0.00076211	0.507178	0.233753	336.854	326.285
GALR1	2970091	18	73091357	CGCCTCGGGGGAAGCTCAGACTCCTAAACTCGCACTCTCCGTGCTTTGCG	GeneID:2587	NM_001480.2	73090721	636	0.272196	3.26385e-07	-0.168497	0.0283912	0.422707	0.150511	316.911	326.483
DPYS	7160551	8	105548234	CGCCGTCCTCCACCAGCACGTCGGCCACCTCCGAGAAGTCATCGTTGACC	GeneID:1807	NM_001385.1	105548453	219	0.27161	5.67615e-07	-0.160581	0.0257863	0.412838	0.141228	398.778	464.68
TLX3	4890593	5	170668994	GATCTGGTCGATGCCGAAGCTGATGGGCTCGTGCGGGTGCGGGGTCTGCG	GeneID:30012	NM_021025.2	170668893	101	0.270252	4.91527e-06	-0.39375	0.155039	0.442075	0.171822	315.765	322.138
ADHFE1	4060465	8	67507490	TGCGCAGTCTTCTCCGCTTACTTTCAAGAATTCGGAGAATTTGGATACCG	GeneID:137872	NM_144650.1	67507288	202	0.267746	6.7427e-05	-0.552681	0.305456	0.447877	0.18013	1019.67	1943.58
ZFP41	2690445	8	144399875	GGGGCTGGGGGTTGGCGGGGAGCGTCCTCAGGGACAAGTCTCCCAGCACG	GeneID:286128	NM_173832.3	144400484	-609	0.266583	0.000253796	NA	NA	0.350673	0.0840902	NA	NA
HOXD12	1110121	2	176672834	GCAGTCTCTACAGAGCGGGCTATGTGGGCTCGCTTCTGAATCTGCAGTCG	GeneID:3238	NM_021193.2	176672776	58	0.265055	1.47802e-06	0.234976	0.0552136	0.413577	0.148523	330.423	316.122
EPO	610240	7	100156562	CTGAGGGACCCCGGCCAGGCGCGGAGATGGGGGTGCACGGTGAGTACTCG	GeneID:2056	NM_000799.2	100156359	203	0.262028	1.75331e-07	-0.0562265	0.00316142	0.540306	0.278278	331.778	333.214
CMTM2	2350324	16	65170554	CGAGAGGAAGCAGGTGTTCTCGATAAAAGCAGCAGCCCTAATTTTATGGT	GeneID:146225	NM_144673.2	65170852	-298	0.260796	8.73158e-06	NA	NA	0.507448	0.246652	NA	NA
HOXA9	4850019	7	27171419	TGGCCGAGCACCCCGACTTCAGCCCGTGCAGCTTCCAGTCCAAGGCGACG	GeneID:3205	NM_152739.2	27171674	255	0.25812	1.54021e-11	0.0631898	0.00399296	0.621516	0.363397	316.591	307.816
HOXD4	4250341	2	176722931	CGGCAGAAGAAAAAGAAGCGAGAGGGGAATATCCTGTGTCTACTCCTTTT	GeneID:3233	NM_014621.2	176724359	-1428	0.255358	1.29729e-06	0.356305	0.126953	0.510884	0.255526	342.968	329.139
ZNF154	840600	19	62912474	ACCTCGGGATCTATGAAAACTACATTACCTAGAATGCTCTGCGTTGAACG	GeneID:7710	NM_003444.1	62912374	-100	0.255237	0.000786888	-0.41808	0.174791	0.35499	0.0997523	399.41	440.312
C1orf114	1230711	1	167663482	CTAAGGGGACGACTAAGGAATCCACGCATCACTAACGTTATAGAGACTCG	GeneID:57821	NM_021179.1	167663294	-188	0.251923	0.000154473	NA	NA	0.30901	0.0570867	NA	NA
HOXA9	4810156	7	27171639	CGGAAATTATGAAACTGCAGATTTCATGTAACAACTTGGTGGCACCGGGG	GeneID:3205	NM_152739.2	27171674	35	0.250135	1.28573e-05	-0.0263705	0.000695402	0.350925	0.100789	316.591	307.816
SLC22A18	2100025	11	2887571	GGTGGGGGCCGGGGCGGAGTCTGTGGGTCAGGACGCCCGCGGCTGGGTCG	GeneID:5002	NT_009237.17	NA	NA	0.24952	3.91012e-08	NA	NA	0.665072	0.415551	NA	NA
SLC2A14	4230577	12	7916834	CGTGACTCGGTTCATCGGGAGCCCTCCGTAAGCAAGACAAGCACCCACCT	GeneID:144195	NM_153449.2	7916762	-72	0.248287	0.000100034	-0.237245	0.056285	0.316534	0.0682467	565.515	758.787
PRDM14	3610471	8	71146753	CGCGCAGGCTCTGAAAACCAAGGTCCAGACCCATACCGAGCGCCCAAAGA	GeneID:63978	NM_024504.2	71146116	-637	0.247848	0.000148262	0.0197352	0.000389478	0.375304	0.127455	290.532	283.91
CXCL5	6940259	4	75083177	GGACACGGGCCGCGCGGCTGGACAGGAGGCTCATAGTGGTCAAGAGAGCG	GeneID:6374	NM_002994.3	75083280	103	0.246547	0.000131178	-0.0461954	0.00213401	0.344997	0.0984498	2445.39	2904.4
BHMT	5550056	5	78443439	CGACCACCTGTCTGGACACCACGAAGATGCCACCCGTTGGGGGCAAAAAG	GeneID:635	NM_001713.1	78443439	0	0.246322	3.94051e-06	-0.010468	0.000109579	0.435329	0.189007	318.487	301.087
CFTR	4250273	7	116906618	CACTCACCTAAACCTGAAACTAATAAAGCTTGGTTCTTTTCTCCGACACG	GeneID:1080	NM_000492.2	116907253	-635	0.245042	5.62002e-06	-0.489535	0.239644	0.476867	0.231825	603.03	1198.8
SST	4560332	3	188870842	GACGGTTGAGAGCACACAAGCCGCTTTAGGAGCGAGGTTCGGAGCCATCG	GeneID:6750	NM_001048.3	188870895	53	0.243646	3.64156e-06	0.268407	0.0720425	0.405746	0.1621	716.622	341.129
HSPA2	6290040	14	64077803	CGCAGGCACCATCACGGGGCTCAATGTGCTGCGCATCATCAACGAGCCCA	GeneID:3306	NT_026437.11	NA	NA	0.243014	4.02417e-06	-0.226447	0.0512783	0.61779	0.374776	928.213	724.211
NEK3	2630278	13	51632135	GTAATTACCCAAGCACACACTCCAAGATCGTCACCTTATTTTAAAGTCCG	GeneID:4752	NM_002498.1	51631933	-202	0.242908	3.92357e-10	-0.409297	0.167524	0.765029	0.52212	826.287	1092.08
ZFP42	2320592	4	189153861	CGCGGTCTAATCAGGCTACAGCCACCCATCAGCTCCGCCAGGGTTAGGGA	GeneID:132625	NM_174900.2	189153919	-58	0.242321	0.00104201	-0.115365	0.013309	0.382641	0.14032	366.026	346.62
ZNF540	3440309	19	42734312	GGGCAGAACCAGGCTAAAGAAACGTCCAGCGTAGCTTCAAGGATGCACCG	GeneID:163255	NM_152606.2	42734148	164	0.242253	1.19543e-05	NA	NA	0.478898	0.236645	NA	NA
HOXD4	4250475	2	176723371	TCGCACTTTGGTCTCTGGCTATTCCGAAGAAACGTGAAGTTTTTGCATCG	GeneID:3233	NM_014621.2	176724359	-988	0.239566	1.56851e-05	0.280393	0.0786203	0.499287	0.259721	342.968	329.139
ATP8A2	4480577	13	24941472	AGTGAAAACTTCTCAGGGCTCAGAGGCAGGCTGGGCGCAGAACGGATGCG	GeneID:51761	NM_016529.3	24941115	357	0.239425	3.99907e-07	-0.148375	0.0220151	0.523548	0.284123	313.399	321.304
HOXA2	3310544	7	27108725	AACACCCTAGCAGCGATATTCTATGATAGATTTTTTTTCCTCTGCGCTCG	GeneID:3199	NM_006735.3	27108919	194	0.239286	7.48734e-06	0.0587391	0.00345028	0.48438	0.245094	723.381	723.281
HOXB1	1430132	17	43963098	CAGGGTCGAAGGCGGCTGCTGGGCGGGATAGCCGGAGTTCTGCTGAAACG	GeneID:3211	NM_002144.2	43963271	173	0.239	4.34835e-13	0.0635518	0.00403884	0.865685	0.626685	338.254	334.968
NR2E1	2570278	6	108593080	AATAGAATTAATCTCTTAGAGATCGGGGATCATCGCTCCCTCGGCATGCG	GeneID:7101	NM_003269.2	108593955	-875	0.238876	1.25359e-06	-0.0582484	0.00339287	0.558995	0.320118	418.831	392.845
ADCY4	6620452	14	23873862	CGGCCTCCCAGCCCGCTCCCAGCTGGCGATGAGGGGATCCCTCAGTCCTT	GeneID:196883	NM_139247.2	23873704	-158	0.238873	0.00183546	-0.513343	0.263521	0.33865	0.0997773	1148.5	2660.75
GDF2	6590673	10	48036897	TTATAGAGCCTTCATTAACGGAAGGCTCCCTCAGATAAGACGTCGGAGCG	GeneID:2658	NM_016204.1	48036859	-38	0.237125	2.55495e-15	-0.289992	0.0840954	0.846309	0.609184	327.978	345.804
HOXB4	3780097	17	44010244	CGCATCCAGGGGTAGACGACGGGCTCTTTGCACGCGGAGTGGGACGGGCT	GeneID:3214	NM_024015.3	44010742	498	0.236599	0.00137218	-0.347409	0.120693	0.331879	0.0952799	708.607	519.243
SALL3	2060324	18	74841250	CGCCGCTAGCAGCATGTCTCGGCGCAAGCAGGCCAAGCCCCAGCACCTCA	GeneID:27164	NM_171999.1	74841263	-13	0.236098	8.00568e-07	0.0385956	0.00148962	0.407567	0.17147	337.766	308.2
CDKN2A	1570403	9	21958372	CCTACCGGCATTGAAATACTTATGGATAAAGTTCTCGCAATGGCTTCACG	GeneID:1029	NT_008413.17	NA	NA	0.236037	0.000694585	0.200306	0.0401225	0.324885	0.088848	318.905	313.448
TBX4	2070368	17	56888626	CGGGCACAGCACACAACGAGTCACTCGCCCAGGTCCACACTCGCCAGAGG	GeneID:9496	NM_018488.2	56888589	37	0.235987	1.35955e-06	-0.485556	0.235764	0.54225	0.306263	424.15	792.833
GRIK2	50315	6	101953688	CGCCAAGGAACAACCTTCCACTGCAAGGAATGGTGGGACATCCATGTTAG	GeneID:2898	NM_021956.2	101953675	13	0.23589	1.08348e-05	-0.0780952	0.00609886	0.405148	0.169258	321.29	325.05
TUBB6	2850687	18	12297630	TTTAGCTAAAGTGACTACAGGGCTGGATCCGAAAATGAACACCTCCTGCG	GeneID:84617	NM_032525.1	12298257	-627	0.234331	0.000828009	NA	NA	0.369581	0.13525	NA	NA
NEUROG1	150521	5	134898876	GCCAGGCGCAGTGTCTCGGCCAGAGCCCAGATGTAGTTGTAGGCGAAGCG	GeneID:4762	NT_034772.5	NA	NA	0.233623	4.05323e-06	0.130312	0.0169813	0.40332	0.169697	336.854	326.285
NEUROG1	2750725	5	134899361	CCGCAACTGGCACAGAGTAACAACCCCAGGCTGTTGGGAACGTAAGTGCG	GeneID:4762	NM_006161.2	134899538	177	0.233391	8.89845e-06	0.0195585	0.000382535	0.43528	0.201889	336.854	326.285
CDO1	6550474	5	115180285	AAATCAGGTTCAGATCTGTGGGGTTCATCCTCCCGGGCCCCTTTTAAGCG	GeneID:1036	NM_001801.2	115180304	19	0.23239	9.62504e-05	-0.523324	0.273868	0.279718	0.0473284	507.349	1157.65
IGF2AS	3390554	11	2118470	CGCGCCACTTTCGTTTGCTCATTGCAAAGATCTCATTTGTGGGGAAAGCG	GeneID:51214	NM_016412.1	2118323	147	0.232386	4.27434e-05	-0.0573061	0.00328398	0.402768	0.170382	345.307	336.662
HOXD10	3460372	2	176689244	CGGGCCCTGAGACATCCCACCCCAGGGGTCCAAAGGAAAGATCCCTTGGG	GeneID:3236	NM_002148.2	176689746	-502	0.232273	1.64911e-05	0.178638	0.0319115	0.440934	0.20866	359.901	296.965
AJAP1	2230537	1	4613868	CGGTCCCTCATCGCCCAGCGCAGCTGCTGCCTGGCCAGGCCCTTGCTCCG	GeneID:55966	NM_018836.2	4614965	-1097	0.230923	2.7945e-05	NA	NA	0.354546	0.123623	NA	NA
ADORA2A	110041	22	23158655	CTGATCCTTGGCCCTGAGTCCAGAGTGGGAGGCACCGTGACAACAATGCG	GeneID:135	NM_000675.3	23159092	-437	0.230705	3.33953e-12	0.198918	0.0395684	0.723335	0.49263	631.545	663.605
FLJ37549	3460408	19	42874895	GTTTTCCGAGTGCGCGGACTCATCGGGTCACAGTTTATGCTTTTATGACG	GeneID:163115	NM_152605.2	42874992	97	0.230604	0.00240767	-0.306154	0.0937306	0.280174	0.04957	342.681	384.416
ADCY2	1340647	5	7448318	CGCCCTGCACGCTCAGCTTCAGTCACACTTTGGAGGTGCCGTATAAGCCT	GeneID:108	NM_020546.1	7449345	-1027	0.230297	1.38278e-06	0.152344	0.0232088	0.453802	0.223505	355.893	349.615
IGSF21	3290541	1	18307163	CGCCTCCACCCCCGCCGCCCCGCCACCGCCGCCAGCTCCCGGGCACCATG	GeneID:84966	NM_032880.2	18306827	336	0.228591	2.35967e-05	NA	NA	0.515498	0.286907	NA	NA
ADCY4	1440477	14	23873647	CGAGACCTACTACAGCCTGAGCCAGCAGTACCCGCTGCTGCTGCTGCTGC	GeneID:196883	NM_139247.2	23873704	57	0.228489	0.00225593	-0.465749	0.216922	0.314268	0.0857782	1148.5	2660.75
UTF1	670682	10	134894104	CGCCGCACCCCCGCGCAGTGCCGCCGCCGCTACAAGTTCCTTAAAGACAA	GeneID:8433	NM_003577.2	134893768	336	0.228421	0.000133036	0.222795	0.0496375	0.359582	0.131161	366.983	366.19
HOXA7	4390348	7	27162678	CGAAGAACTCATAATTTTGACCTGTGATTTGTTGTCCGGCAGCTTTCAGT	GeneID:3204	NM_006896.2	27162821	143	0.226526	0.000781763	0.0531664	0.00282666	0.318135	0.0916088	713.844	535.815
EOMES	4730634	3	27740287	GCGTCTGTAATTGCTTATTAACAGCGAATATTCAGGCTTCTCCTTATCCG	GeneID:8320	NM_005442.2	27738789	-1498	0.224943	5.34449e-05	-0.196677	0.0386818	0.379826	0.154883	962.122	670.359
PRRT1	6650296	6	32227663	CGCCATCCAGCACCCAGACTCCAGCACCGGCCGAGGACCCCCACTCCGGC	GeneID:80863	NM_030651.2	32227698	35	0.224201	0.000591179	NA	NA	0.400669	0.176469	NA	NA
ABCA3	2350349	16	2331829	GAGGTGGGTCGGGGTGTCCCTGGGCCGGACCGGGTCGTGGGACTGGGTCG	GeneID:21	NM_001089.1	2330595	-1234	0.22395	0.00252514	-0.272135	0.0740574	0.393259	0.169309	5294.2	18236.5
SOX17	5820215	8	55533097	CAGTGTCACTAGGCCGGCTGGGGGCCCTGGGTACGCTGTAGACCAGACCG	GeneID:64321	NM_022454.2	55533048	49	0.223544	6.82409e-08	-0.279789	0.0782817	0.471354	0.24781	401.085	549.244
HOXA2	2230736	7	27109207	AAATGATTTGTGAGGTGCGAGGCGTCTTCCCGACAGTCCCAAACAATGCG	GeneID:3199	NM_006735.3	27108919	-288	0.22284	3.31767e-05	0.00417808	1.74564e-05	0.456119	0.233279	723.381	723.281
CTNNAL1	6290577	9	110816600	CGCCGTGAAGGAATTCCAGACTTAAGCAACAGACTGAGAAGCATGAAAAA	GeneID:8727	NM_003798.1	110815585	-1015	0.222716	7.57145e-09	-0.41369	0.171139	0.616124	0.393408	1959.69	3853.17
HOXA11	990162	7	27191747	CAGGGTCCTCGTTCTCGAGTGTGCAGAGGGCGGTGAGAGCTCAACTCTCG	GeneID:3207	NM_005523.4	27191355	-392	0.222428	0.000792758	0.0926376	0.00858172	0.293227	0.0707985	413.853	348.108
PTGDR	2070086	14	51804036	GAGGCGGGACGCTCTGCAGGGTGAGCGCCTGGCGCTGGCATTGAAGAGCG	GeneID:5729	NM_000953.2	51804181	-145	0.222418	1.20498e-05	-0.137687	0.0189577	0.391457	0.169039	438.915	461.327
PHOX2A	6520692	11	71632630	GCAGGGGGCTGTATTGGAAGCCGCCGGGCTGGCTGCAGGCGCCAAAGTCG	GeneID:401	NM_005169.2	71632852	222	0.221096	0.000208156	0.179413	0.0321892	0.289664	0.0685675	353.004	335.11
VSX1	4210121	20	25010254	GGGCCGCTGGGGCCAGGGGTGCGGTGGGGCGATGGTCTGTGACCCCTGCG	GeneID:30813	NM_014588.4	25010767	513	0.220783	0.000146404	0.0734117	0.00538928	0.288208	0.0674248	319.24	317.282
FERD3L	6040327	7	19151486	CGCAGCTCTCCGGATAGGCCGCCATCGCTTCGGCTTGGCCCTGCCTCTCA	GeneID:222894	NM_152898.2	19151569	83	0.219643	3.55633e-05	-0.0304501	0.000927206	0.294859	0.0752164	342.32	345.037
SLC2A14	1010474	12	7916762	CATTCAAAGTCGAATCCTAGGCTTTTCGAGGCAGTTAGTGGGTCCCAACG	GeneID:144195	NM_153449.2	7916762	0	0.219054	0.000124788	-0.295865	0.0875362	0.405993	0.186939	565.515	758.787
HCG9	1780082	6	30051380	TCAGGTGCGATGTGCAGCGAGGTGCGGGAGCTGGACGCTGCCGGTTGCCG	GeneID:10255	NM_005844.2	30050871	509	0.217747	0.00169042	-0.385456	0.148576	0.386609	0.168862	330.031	355.937
GNG4	1570719	1	233880662	TAAAGTGTTTTAAAATCTCCAGCGCAAAAGCCTGCGGTGCCACAGGGACG	GeneID:2786	NM_004485.2	233880677	15	0.217472	0.000842522	-0.0734349	0.00539268	0.371324	0.153852	750.614	298.63
BHMT	5130731	5	78443308	CGGACCTTGGGCGGGAACACGCCCACCAGCCCTTCATCAGGCCCGCCTCC	GeneID:635	NM_001713.1	78443439	-131	0.217141	0.00021177	0.106167	0.0112715	0.483409	0.266269	318.487	301.087
NPTX2	6380168	7	98083766	TCAGGTCTTGCTGAATAAGGTCACCGCCCAGGGGGCAGTCGATGAACACG	GeneID:4885	NM_002523.1	98084545	-779	0.216297	5.57515e-07	-0.272287	0.0741401	0.589345	0.373048	1159.32	360.899
BARHL2	1050521	1	90955444	CGGCGGCAACATTGTTTGGTGTTTATTTTGTTTTACGATCGATAGCTTTC	GeneID:343472	NM_020063.1	90955382	-62	0.215845	0.000128464	0.134674	0.0181371	0.358386	0.142541	376.532	369.249
FLJ90650	1450551	5	115326619	TCCTGGAAGAGGCTATGCAGCAGCAGTCGAGAGGTGGCCACCGTGCAGCG	GeneID:206338	NM_173800.3	115326170	449	0.21329	1.08492e-06	-0.0174635	0.000304973	0.449167	0.235877	326.409	318.641
EDN3	580170	20	57308741	TGGATGGGGGGCTGCTACTCCGGAGCGGCGAACTGGCGGGCGGGGGTGCG	GeneID:1908	NM_000114.2	57308894	-153	0.213055	1.1131e-05	0.0308992	0.000954761	0.353773	0.140718	305.233	325.582
PITX2	2260528	4	111778554	AAATTCTAGACTCTATGAGCGTCTGAGCCTTGTCCAGTGCAAACCCTTCG	GeneID:5308	NM_153426.1	111777957	-597	0.21301	5.04273e-07	-0.159797	0.0255351	0.476319	0.263309	311.041	309.428
HOXD12	1710167	2	176672702	GCTGAAATGACCGGCTTTGAAGAACCTGCAGGCAAAGTTTCGTCCAATCG	GeneID:3238	NM_021193.2	176672776	-74	0.212911	0.000189161	0.123103	0.0151544	0.306227	0.0933163	330.423	316.122
LEP	6520441	7	127668168	GGGGGTGGCTGTGAGGGGCTCCGCGGAGCGGGCTGGGGCATACGGCTGCG	GeneID:3952	NM_000230.1	127668567	-399	0.212339	1.54823e-08	0.00711043	5.05582e-05	0.629815	0.417476	373.453	309.721
ALDH1A3	2900075	15	99238159	AACCCCTGCGATGATTTCCAGGGTGGACGAGTCTGGCTTTGAGAGGGTCG	GeneID:220	NM_000693.1	99237584	575	0.212026	0.00181422	0.135911	0.0184718	0.295856	0.0838299	2107.32	1200.22
KCNA1	6060717	12	4890954	CGCAGCTCAAGACCCTGGCGCAGTTCCCCAACACGCTGCTGGGCAACCCT	GeneID:3736	NM_000217.1	4890806	148	0.212012	6.42494e-05	-0.173851	0.030224	0.486309	0.274297	326.337	310.974
DCC	6550487	18	48122475	TCTGCTAAGTGCTGCATGGCCAAGGGTTGCGAACGCGAGCAGAAAATGCG	GeneID:1630	NT_010966.13	NA	NA	0.209717	5.26161e-05	-0.0384354	0.00147728	0.328237	0.11852	306.969	321.852
HOXD8	5490326	2	176703334	CGCCCCAATGAGTTCGTACTTCGTGAACCCGCTGTACTCCAAGTACAAGG	GeneID:3234	NM_019558.2	176702723	611	0.208482	0.000153462	-0.189772	0.0360133	0.364731	0.15625	806.452	493.421
SORCS3	4590630	10	106390870	CAATTATTAATTTTCCTCGGGTTTGGAATCACCCTCTGGACAAGAGAACG	GeneID:22986	NM_014978.1	106390849	21	0.208072	0.000237732	-0.0980034	0.00960467	0.356709	0.148637	344.374	322.635
STAR	7160068	8	38127700	CGCCATCACTCACTGTGCAAAGGAAGGGGTCAAGGATAGAGCGATTGCCT	GeneID:6770	NM_001007243.1	38127757	57	0.208067	0.00310782	0.417745	0.174511	0.263528	0.0554618	508.393	319.594
C1orf114	1500022	1	167663261	GGAGGACGCAGAGGCACGCTGTTGCCATGGCAGTGTGGTCCTGGCTGCCG	GeneID:57821	NM_021179.1	167663294	33	0.208037	0.00175755	NA	NA	0.271306	0.0632697	NA	NA
ADCY8	3460681	8	132123737	CGCGGCTCATCTGTCATTAGCACCGGCACTAAGCTCCCACCGCTCAGCGA	GeneID:114	NM_001115.1	132123854	117	0.20771	0.000505107	-0.183786	0.0337774	0.33619	0.128481	376.677	373.071
GPR26	7320133	10	125416038	GACCACGGTGCACAGCAGGTTCCCGCACGTGAGGTTCAGGGTGAAGAGCG	GeneID:2849	NM_153442.1	125415861	177	0.207601	2.23596e-09	-0.0450926	0.00203335	0.513004	0.305403	321.864	323.983
HBQ1	6270274	16	170341	GATCCAGGGCGATTCAGAGGGCCCCGGTCGGAGCTGTCGGAGATTGAGCG	GeneID:3049	NM_005331.3	170335	6	0.207241	0.000117069	0.0130586	0.000170528	0.327733	0.120492	390.434	339.058
WT1	5910458	11	32405345	CGGCCGGCCAAGTTCACCCAAAGTTGAAGAAAAAATTTGGGGGAGAGAAG	GeneID:7490	NT_009237.17	NA	NA	0.20722	0.000123702	0.169034	0.0285723	0.315638	0.108418	475.888	377.119
HOXA5	6400397	7	27149721	CGGTCGCTATCCAAATGGCCCGGACTACCAGTTGCATAATTATGGAGATC	GeneID:3202	NM_019102.2	27149812	91	0.206032	1.22942e-05	-0.16874	0.0284734	0.566984	0.360953	2321.16	4528.21
LEP	1580168	7	127668516	CGCAACTGCCCCGCAGGCCCCGGCGCATTTCTAGCGCCAGCTCCCGCCCC	GeneID:3952	NM_000230.1	127668567	-51	0.205299	4.2893e-08	0.0270628	0.000732396	0.625508	0.420209	373.453	309.721
GSH1	160347	13	27264814	AGCCGAAAGGTGCGGTGGGCGCAGAGGGCGGGCTGGCTGCGGGGCGACCG	GeneID:219409	NM_145657.1	27264780	34	0.204967	2.68117e-05	-0.239627	0.0574211	0.394923	0.189957	342.918	343.934
WIT-1	830136	11	32415290	GTGTGTGCGGGCCCAGGACTTACTCGAAGGGCGCACTTCTTGGGAATGCG	GeneID:51352	NM_015855.2	32416051	-761	0.204922	0.000104195	0.215779	0.0465606	0.333687	0.128765	369.013	342.614
HOXD4	6270048	2	176724663	CGGAGGGAACTTGGGGTCCACATACTTGGAGTTCACCATATACGAACTCA	GeneID:3233	NM_014621.2	176724359	304	0.204627	0.000137384	0.105312	0.0110906	0.349611	0.144984	342.968	329.139
SPAG6	3180500	10	22674608	AGGTGCTGCAAGGTAGGGCCGAGGCGGGCAGGTGCCCTAACTAGCTGGCG	GeneID:9576	NM_012443.2	22674405	203	0.204619	8.99153e-05	-0.37049	0.137263	0.395427	0.190808	375.206	505.536
GAS7	5490494	17	10042198	AAGGGGCGAGGGCCGGGGCTGTAGGAGCCGGGGCTGCGGTCCTCGGTGCG	GeneID:8522	NM_003644.2	10042593	395	0.204488	0.000216821	-0.243051	0.0590739	0.283822	0.0793337	690.235	923.682
MYOD1	2000161	11	17698263	CGCCGCCTGAGCAAAGTAAATGAGGCCTTTGAGACACTCAAGCGCTGCAC	GeneID:4654	NM_002478.3	17697735	528	0.204368	4.64617e-08	NA	NA	0.393442	0.189074	NA	NA
LHX1	2340678	17	32368142	CGGCCTGCGACCAATCAGCGCCTCGCGGTCCCTCTGTAAACCATTCTGCA	GeneID:3975	NM_005568.2	32368612	-470	0.204181	4.40965e-05	0.0907934	0.00824344	0.40598	0.201799	307.743	293.116
HOXD3	6520327	2	176735887	GGGCTCTCAAGCCAGCTGGTCCTGTAGCTGCTTTATATAATACATTCACG	GeneID:3232	NM_006898.4	176737051	-1164	0.203527	0.000174402	0.370553	0.13731	0.358852	0.155325	443.808	400.526
K6IRS2	5080095	12	51281562	GCTGACTCCAGCCAGCCAGGCTATTTAAGGGGCGAGCTGGGCCGAGAACG	GeneID:140807	NM_080747.1	51281559	-3	0.20302	2.50529e-05	0.0276733	0.000765811	0.469682	0.266662	340.85	325.158
PRLHR	2190603	10	120344617	CGCTCCAGCCGTCACGCCCTTCCAGAGCCTGCAGCTGGTGCATCAGCTGA	GeneID:2834	NM_004248.1	120344746	129	0.202973	7.99021e-07	NA	NA	0.545767	0.342794	NA	NA
WT1	520619	11	32406214	AGTACTGCTGCTCACCTGCAGAGAGAACCGAAGACAGCTGAGCGAGTGCG	GeneID:7490	NT_009237.17	NA	NA	0.202889	7.90333e-05	0.0831763	0.0069183	0.483499	0.28061	475.888	377.119
PAX7	5090753	1	18830219	ATATATAAATAAATACGAGAACGAAATCCACTCCGCAGTCTCCGGGCTCG	GeneID:5081	NM_002584.1	18830087	132	0.201779	0.000859336	0.0417281	0.00174123	0.404691	0.202912	348.674	360.136
PRX	1050541	19	45611085	CGCTGAGCCTCCAGACACCTCGAGAGCTCCTGGTCCCGTCTGTCAGCCCT	GeneID:57716	NM_020956.1	45611111	26	0.201372	3.51421e-06	-0.382768	0.146511	0.679182	0.477811	485.714	1184.79
PABPC5	3780524	X	90576482	TTCAGCAGCCTGAGGCTCGAGGCAGGTCCGGAGAGACTGACTGGCAAACG	GeneID:140886	NM_080832.1	90576253	229	0.200906	0.000488353	-0.0867693	0.00752891	0.366971	0.166065	292.213	308.172
DCC	5390601	18	48122676	ACCAGCGGCTAAGCGCGGGGATGCGGGTACGCGCTCATCACAGGACAGCG	GeneID:1630	NT_010966.13	NA	NA	0.200815	9.47461e-06	-0.160021	0.0256068	0.332883	0.132068	306.969	321.852
CUTL2	830646	12	109956346	ATTGAAACATCGATCCCACATTGGCGGCCATCTTGGGGGCTATCGAGACG	GeneID:23316	NM_015267.1	109956212	134	0.200011	0.000349417	-0.133244	0.0177539	0.268065	0.0680531	332.719	344.183
SPAG6	3120136	10	22674044	GGGCAGCCAGACGAGTAAATTGCAGCCCTGGAGTTGTCTGAGCTTCGACG	GeneID:9576	NM_012443.2	22674405	-361	0.19994	0.000588662	-0.37049	0.137263	0.452458	0.252518	375.206	505.536
FLJ32447	7330133	2	222871119	TTGTCCATTCGAAATTGTCTCGAAGTTGTCTCGAAATTGTCCCGGCTGCG	GeneID:151278	NM_153038.1	222871110	9	0.198017	0.000722441	0.159461	0.0254277	0.311058	0.113041	315.632	314.497
RASSF1	1240333	3	50353417	AGAGCCGCGCAATGGAAACCTGGGTGCAGGGACTGTGGGGCCCGAAGGCG	GeneID:11186	NM_007182.4	50353371	-46	0.197993	0.0186754	-0.245207	0.0601267	0.23632	0.0383265	1462.7	2474.03
AFAR3	4480209	1	19473317	TGCTCGGTGCAAGTGCAGACGGTCCTCGTGGTTGAGAGCGGAGTCCAGCG	GeneID:246181	NM_201252.1	19473022	-295	0.197548	2.88915e-05	0.446128	0.19903	0.500517	0.30297	451.224	369.038
GREM1	270161	15	30797828	GCGGGGGTGAATTGTGAAGAACCATCGCGGGGTCCTTCCTGCTGAGGCCG	GeneID:26585	NM_013372.5	30797497	331	0.196846	2.32392e-06	NA	NA	0.377815	0.180969	NA	NA
ZNF177	2450669	19	9334696	CGCCATCTCCCATAGCTGTCGCCTGCAGCTGAGAAAGGGTTGCTGTCCCA	GeneID:7730	NM_003451.1	9334696	0	0.196522	0.000361666	0.323437	0.104611	0.398766	0.202243	742.915	893.798
GRIK3	6620750	1	37271896	CGGGATCGCACTGGAAACCTTCGCCACACTGTGCCAGGTCTGACCTCCCA	GeneID:2899	NM_000831.2	37272431	535	0.196515	4.88566e-05	0.207846	0.0431998	0.354893	0.158378	319.708	305.889
FLT4	2480673	5	180008481	GGGTGCAGGTGCACGCTGGCACTTGAGACGAATCTTGAGGAGGCGAATCG	GeneID:2324	NM_182925.1	180009172	691	0.196457	2.95962e-05	-0.339423	0.115208	0.392796	0.196339	321.684	366.417
DLX5	1850259	7	96489217	ACGGTGGGGATGGTATTCATCAGCGGTCTGGAGATACCTCCCACTAACCG	GeneID:1749	NT_007933.14	NA	NA	0.195637	0.000121479	0.0245777	0.000604066	0.465418	0.269781	357.171	319.708
HTR2C	4250343	X	113724666	CGCGCCCCCTGCCAGCAGGCTCCAGATGCACTAAGAGACCGGTCCAAACA	GeneID:3358	NM_000868.1	113724807	-141	0.19444	0.000842522	0.254673	0.0648581	0.373143	0.178704	330.872	291.072
HCG9	6980373	6	30051393	GTCGCGGCGGGGCTCAGGTGCGATGTGCAGCGAGGTGCGGGAGCTGGACG	GeneID:10255	NM_005844.2	30050871	522	0.194072	0.00224136	-0.39214	0.153774	0.292721	0.0986495	330.031	355.937
ALDH1A3	6110747	15	99238512	TGTGGGCTGGGAGGCTACAGCGTTGGCAGAACGGCGAGATTACCTGCCCG	GeneID:220	NT_035325.6	NA	NA	0.193743	0.00329955	0.146113	0.0213489	0.360921	0.167179	2107.32	1200.22
KRTHB1	3120538	12	50971601	CGGTGCCCTGAGGAGCACATTGGAGTTTCCATCAGGACTCCAGGTCCCCT	GeneID:3887	NM_002281.2	50971566	-35	0.193491	1.12814e-11	NA	NA	0.713515	0.520024	NA	NA
ZNF671	1440553	19	62930740	CGGCCCACACAAGCGTTACAGAACCCCGGCCAGGGACAGCCTGACAGAAA	GeneID:79891	NM_024833.1	62930795	55	0.193317	0.0196244	NA	NA	0.227483	0.0341661	NA	NA
GAL3ST3	7050368	11	65573218	CGCTGCCACCTGATCCCATCCAGGCGCTGAGAGGCAAGCCACCGGCACTC	GeneID:89792	NM_033036.1	65573227	9	0.191987	0.000280337	NA	NA	0.381112	0.189126	NA	NA
TP73	6860544	1	3557864	CGGGCCCCATAAGCATCAGACCATAAGCAGCGCCGCCACTGAGAGCCGCT	GeneID:7161	NT_004321.17	3558989	-1125	0.19194	0.00418121	0.161121	0.02596	0.313102	0.121162	331.637	320.212
DRD5	1340433	4	9392721	CGCGGTCCCAACTTCAGCCCTGCGACCCCCAGGCAGCCCCATCGGGCACC	GeneID:1816	NM_000798.3	9392701	20	0.191841	1.67879e-07	NA	NA	0.424611	0.23277	NA	NA
NPY	7210220	7	24290960	AAAGTTTCTTCTCTGTTACTTCTGGTCTGCCTAGCTTCAGGGGATCAACG	GeneID:4852	NM_000905.2	24290334	626	0.191743	6.65872e-05	-0.144175	0.0207863	0.344586	0.152843	441.934	397.235
ZNF135	1110324	19	63262280	AGTGACTGGGCCTGGTGAAACAGGGCGCGCGGGGTGCCTGGGCATCAACG	GeneID:7694	NM_003436.2	63262424	-144	0.190661	0.000337281	-0.324654	0.1054	0.456018	0.265356	663.885	645.177
FLJ32447	2470025	2	222870015	CAGGACGTATGGAGCCAGTCTCCTGGTACCTGCACAGGATCTTGGAGACG	GeneID:151278	NM_153038.1	222871110	-1095	0.190558	0.000404015	0.127639	0.0162916	0.387576	0.197018	315.632	314.497
WT1	4880221	11	32406680	CGGCGCAGTTCCCCAACCACTCATTCAAGCATGAGGATCCCATGGGCCAG	GeneID:7490	NT_009237.17	NA	NA	0.19012	2.73862e-05	0.082934	0.00687805	0.494315	0.304195	475.888	377.119
CCDC37	1990500	3	127596474	TTGGAGACGTAAACCCAAGAGCCCTGCTCCTGGAGCTGAGAACTGCAGCG	GeneID:348807	NM_182628.1	127596472	2	0.189899	0.000976386	NA	NA	0.339528	0.149629	NA	NA
MT1A	6960564	16	55229916	GAGGGGGTGGTCCCGTGGTCCGCACCCAGGGGAGCTCAGTGGACTGTGCG	GeneID:4489	NM_005946.2	55230079	-163	0.189782	0.00109388	-0.318839	0.101658	0.288063	0.0982809	490.528	792.781
IGF2AS	7330367	11	2118468	GCCGCTTTCCCCACAAATGAGATCTTTGCAATGAGCAAACGAAAGTGGCG	GeneID:51214	NM_016412.1	2118323	145	0.189535	0.000203183	-0.0364362	0.00132759	0.363178	0.173644	345.307	336.662
GRM6	4060746	5	178354850	GACAGCGGCTGGCGCAGGTGACTGGCTTGGGGCGGGAGCCTGGGTGTGCG	GeneID:2916	NM_000843.2	178354730	-120	0.188941	0.000110159	-0.184849	0.0341692	0.334823	0.145882	323.599	327.383
NKX6-2	1030220	10	134449139	AGAAGATGGGCGGGCGCCCCGGCAGCTCGGCCAGGGGCTTGGGGTAGCCG	GeneID:84504	NM_177400.1	134449442	303	0.188734	2.17322e-07	-0.0283855	0.000805736	0.479651	0.290917	327.379	324.21
ACTL6B	2370632	7	100091850	ACAGGCCCCGGGGTGCCCAGAGCTCGGATGGATGGCGCGGGTTTGGAACG	GeneID:51412	NM_016188.3	100091986	136	0.188725	0.000840255	NA	NA	0.333758	0.145033	NA	NA
EVX1	1110376	7	27248956	CGGCACAGAGGAGCGCTCGCTTCACAAGGTGACCCTAGCTCCCACCGCCA	GeneID:2128	NM_001989.2	27248946	10	0.188473	0.000106641	0.0805345	0.00648581	0.345684	0.157211	356.305	355.545
ALX4	160301	11	44283975	CGCTTTCGATTCGGTGGCGACAGGTTTTTGTTGAAAGCAGATTGTTACCT	GeneID:60529	NT_009237.17	NA	NA	0.188096	0.0149593	-0.0919612	0.00845685	0.325939	0.137843	336.039	325.337
ARHGEF4	7560358	2	131390671	CGCAAAGAGACTCAAAACAACGGAGAAAAAACTCAGGGCAAGGTTGGCCT	GeneID:50649	NM_015320.2	131390694	-23	0.188044	0.000168727	0.136732	0.0186955	0.555371	0.367327	346.417	330.835
FZD2	4050446	17	39990836	CAGGCCTAGAGGTGCACCAGTTCTATCCGCTGGTGAAGGTGCAGTGCTCG	GeneID:2535	NM_001466.2	39990451	385	0.188032	0.000792279	-0.00120869	1.46094e-06	0.307215	0.119183	1184.6	817.324
TF	4120754	3	134947870	GGGGCGATTGGGCAACCCGGCTGCACAAACACGGGAGGTCAAAGATTGCG	GeneID:7018	NM_001063.2	134947925	-55	0.187878	0.0016079	-0.057284	0.00328146	0.342946	0.155069	1112.99	392.338
RUNX3	5860746	1	25130919	CGGCAAAGGTCCCTTACTGAACCTTTTAAGAGAGCCTGCGCCTGGCAGTT	GeneID:864	NT_004610.18	NA	NA	0.187608	1.73288e-08	0.000904807	8.18676e-07	0.692878	0.50527	1639.66	1750.41
SERPING1	630286	11	57121417	CGGAGCACATTTTGTGTACATGCTGTTTTTATTGTTACTCATGAAGACGC	GeneID:710	NM_000062.2	57121603	-186	0.187385	1.36093e-06	NA	NA	0.586719	0.399335	NA	NA
SOX11	2190450	2	5750620	CGGCTCAAGCACATGGCCGACTACCCCGACTACAAGTACCGGCCCCGGAA	GeneID:6664	NM_003108.3	5750250	370	0.187359	0.000142138	-0.177393	0.0314682	0.307208	0.119849	531.915	398.612
PDE4DIP	4760373	1	143787188	GCCAGGCCCAGGAAATCCATGAAGGGCACAGACAGCGGGTCCTGCTGCCG	GeneID:9659	NM_001002812.1	143787380	192	0.186354	8.2626e-05	NA	NA	0.411482	0.225127	NA	NA
FLJ46831	150047	10	129425958	CGGGCTGGCAGAACTCCATCCGCCACAACCTGTCGCTCAACGACTGCTTC	GeneID:399823	NM_207426.1	129425942	16	0.185961	4.88305e-05	NA	NA	0.310377	0.124415	NA	NA
HIST1H1A	3180201	6	26126164	CGCAAGCAAACACACAGAAAAAGCCGCTCTGGTTGCCTCATTGTGAAGGA	GeneID:3024	NM_005325.2	26125995	-169	0.18572	9.61621e-06	0.0454575	0.00206638	0.681574	0.495854	321.144	301.003
CLDN19	4010091	1	42978210	AGGACATCCAGAGCCCTTCATAGAGGCCCACGGCAGTGATGATGGCGTCG	GeneID:149461	NM_148960.1	42978512	302	0.185623	3.58621e-10	0.0476451	0.00227006	0.800819	0.615196	337.561	335.624
IRF8	6620025	16	84490354	CGAGACGGCGGCAGGACGGCGGCAGGTAGGCACAGTGGGCGGGTAGGGCG	GeneID:3394	NM_002163.2	84490275	79	0.185144	0.01129	NA	NA	0.231586	0.0464415	NA	NA
DRD1	1260431	5	174803574	CGCCCAGGAGCCCTTAGCCGGGGTCTAGTGCCCTTTGAACAATCTCCAGC	GeneID:1812	NM_000794.2	174803769	195	0.18477	0.0023854	0.0250712	0.000628567	0.254131	0.0693603	337.688	339.368
PAX3	7320471	2	222873113	GAGTGACAGTCCCTGAATAGGCTCGAGCGAATAAAGCGCAGTGCAGAGCG	GeneID:5077	NM_181457.1	222871944	-1169	0.184505	8.48265e-05	-0.203318	0.041338	0.464243	0.279738	370.992	383.112
SOX17	4070288	8	55532724	CGCTCGGTATGTTCATCTAAACGACCTTGGGCAAGTACGTCGATTCCAAG	GeneID:64321	NM_022454.2	55533048	-324	0.184176	0.000412432	-0.29143	0.0849317	0.460858	0.276682	401.085	549.244
SALL3	7100059	18	74841389	CGGGCAGCCCCAGACCCCCCGGCCACCCCGCAGCCCCGGCCCTCACCGTG	GeneID:27164	NM_171999.1	74841263	126	0.183784	5.90954e-05	-0.105822	0.0111984	0.324063	0.140279	337.766	308.2
FSD1	2000026	19	4256090	CGCCCCGCCAGCTCCGCAGTGCGGACCCCACCGACCCTGCCCCAGGAAAA	GeneID:79187	NM_024333.1	4255691	399	0.183727	1.42525e-06	-0.110801	0.0122769	0.647153	0.463426	421.409	360.221
FOXD2	2190739	1	47672914	CGGAATTTATTTCGTTTTCTTTGCTTCTTCTGTGACCCTTACTTCTTTCG	GeneID:2306	NM_004474.2	47674276	-1362	0.183697	5.99444e-07	0.214981	0.0462167	0.563751	0.380054	305.614	288.664
WT1	7560072	11	32406026	AGGAAGGCGCTGGGCTCTGCGTCTGGGTCCTTGGGACCCCGGAGGGGACG	GeneID:7490	NT_009237.17	NA	NA	0.183014	6.70976e-06	0.109718	0.012038	0.509097	0.326083	475.888	377.119
ZNF560	360017	19	9470397	CGCGGAGGGAAACTAGAATCCTGAAGAGTTCCATCCTGTCCAACTGCCCA	GeneID:147741	NM_152476.1	9470279	-118	0.182963	7.92476e-05	NA	NA	0.281547	0.0985841	NA	NA
HIST1H3J	3120600	6	27966524	TTTCAGAGCATAGCTTTCTCAACTATGGCCCGGACGAAGCAGACAGCTCG	GeneID:8356	NM_003535.2	27966549	25	0.182535	0.0153755	-0.135715	0.0184186	0.27498	0.0924456	347.318	323.834
WT1	3840133	11	32409184	GAGGAGGGCACAGAGCGCGTCTCGCCTCTTAGCGCACGGTCAAGGTTGCG	GeneID:7490	NT_009237.17	NA	NA	0.181285	5.63887e-09	-0.0828011	0.00685601	0.662626	0.481341	475.888	377.119
POU3F1	3610100	1	38284144	CGTGTTCTCGCAGACCACCATCTGCCGCTTCGAGGCCCTGCAGCTGAGCT	GeneID:5453	NM_002699.2	38285037	893	0.181111	0.000124772	-0.00166861	2.78425e-06	0.326327	0.145216	344.255	346.664
CHODL	5050075	21	18539047	CGCCCTGGTCCTGGATCACAGCAGCAGCAGCCGCTCTGCGCTCAGGCACC	GeneID:140578	NM_024944.2	18539021	26	0.181038	6.40946e-05	0.228121	0.0520391	0.42034	0.239301	533.557	371.672
SOX3	4920110	X	139414850	GACTGTGAATGCGACCTGTTCGAGAGAACTCATCAGGTGCGAGAAGCCCG	GeneID:6658	NM_005634.2	139414891	41	0.180135	0.00548265	0.0344572	0.0011873	0.414792	0.234657	328.244	318.525
ADRB3	2320719	8	37942632	GGACAGCTGTGGTCCTGGTGTGGGTCGTGTCGGCCGCGGTGTCGTTTGCG	GeneID:155	NM_000025.1	37943341	709	0.180115	0.000414087	0.236757	0.0560537	0.257988	0.0778739	330.794	327.728
CRMP1	110487	4	5945592	CGCCATACCCGTCCAAGGCCGGCCACCCACCGCGCTCCCGCCTGCCCGCC	GeneID:1400	NM_001313.3	5945686	94	0.179845	1.29729e-06	0.0190514	0.000362956	0.580575	0.40073	1409.03	776.556
ADRA2C	990711	4	3738353	GGGCTTCCTCATCGTCTTCACCGTGGTGGGCAACGTGCTGGTGGTGATCG	GeneID:152	NM_000683.3	3738094	259	0.179782	2.43555e-06	-0.051731	0.0026761	0.469287	0.289505	507.617	452.531
RYR2	7100309	1	235272573	GAAGGGGGCGTCAGGGCATCCACTAGCGGGGTCCGGGCAGAGTGACAGCG	GeneID:6262	NM_001035.1	235272325	248	0.179776	0.00348882	-0.15783	0.0249102	0.264722	0.0849458	578.005	826.601
KLHL21	10364	1	6586855	CATGCTCACCCTGAAATTCAGACCAGATGCATTCTTATGGCAAAATGACG	GeneID:9903	NM_014851.2	6585516	-1339	0.179678	4.77263e-05	NA	NA	0.518095	0.338416	NA	NA
IRXL1	6840095	10	28075637	CGGTAATGTTAGGAAGCAAAGTATCATCAATCAGAGAATCTGGTAGCCAT	GeneID:283078	NM_173576.1	28074753	-884	0.17953	0.000267368	NA	NA	0.359582	0.180051	NA	NA
KCNA5	2710291	12	5023549	CAGGGGCACCAGGGCGATCTCCATGGCGCGGGAGCAGAGGGCATGCTGCG	GeneID:3741	NM_002234.2	5023346	203	0.178887	5.39112e-06	-0.24704	0.061029	0.392542	0.213655	440.405	690.53
WT1	4540634	11	32405830	GGTAAATTCCTCCCAGTAAAGACCTTCTAAAAATAATAACTTCTCGAGCG	GeneID:7490	NT_009237.17	NA	NA	0.178684	0.000206894	0.208659	0.0435387	0.461251	0.282568	475.888	377.119
RASSF1	6660634	3	50353195	CGGGTGCCAGCTCCCGCAGCTCAATGAGCTCAGGCTCCCCCGACATGGCC	GeneID:11186	NM_007182.4	50353371	176	0.178614	0.0222084	-0.246265	0.0606464	0.241835	0.0632211	1462.7	2474.03
GATA4	3890398	8	11603505	CTGGTGCGGGGCCCGGGACCCAGCAGGGCAGCCCGGGATGGAGCCAGGCG	GeneID:2626	NT_077531.3	NA	NA	0.178517	4.17362e-05	0.351324	0.123429	0.482026	0.303509	344.85	314.791
IRXL1	4540386	10	28074253	CGCTCGGACCTTTGCCATCGCTTGCCTCTGAGCCTGCTGCCTGCAGACCT	GeneID:283078	NM_173576.1	28074753	500	0.178277	2.59423e-05	NA	NA	0.371422	0.193144	NA	NA
WT1	6770152	11	32408946	TAATCAAACCCGTGTCCGATAAGCTTCTAATTAAAAGAGACCTCCCTCCG	GeneID:7490	NT_009237.17	NA	NA	0.178042	2.54628e-07	0.00425304	1.80883e-05	0.552486	0.374444	475.888	377.119
WT1	6560634	11	32408763	CGGCACCCACTCTCGAGACGTCCGTCCGCACCCCAGAACTCGGGCCCAAG	GeneID:7490	NT_009237.17	NA	NA	0.178014	6.31055e-05	0.0666009	0.00443568	0.618382	0.440368	475.888	377.119
HNT	2070521	11	131285542	TGGTTAAACTCCTGGCCTGGGCTGGGCTGGTGCACAGCCTGGGCCCGGCG	GeneID:50863	NM_016522.2	131285922	-380	0.17778	0.000734492	-0.0419908	0.00176323	0.307059	0.129279	606.913	689.119
GIPC2	5860044	1	78284567	TAGTGCCACGGGCCGAGTGGAGGGCTTCTCCAGCATCCAGGAGCTCTACG	GeneID:54810	NM_017655.4	78284177	390	0.177767	0.000301588	-0.357065	0.127496	0.279691	0.101924	381.86	413.747
TBX5	2940131	12	113330251	ACTCGTGACGTCTCCAAGTCCTATAGGTGCAGCGGCTGGTGAGATAGTCG	GeneID:6910	NM_080718.1	113330630	379	0.17764	9.03251e-05	-0.220414	0.0485822	0.286917	0.109277	337.923	346.96
NETO1	360152	18	68685514	CTTCCCGTCTCTAAATGGAATTAGTGGAGCCCGGAGCCTCTGGTGTAACG	GeneID:81832	NM_138999.1	68685790	276	0.177542	4.29707e-05	-0.24903	0.062016	0.374013	0.19647	351.63	354.007
PGLYRP1	3780364	19	51218157	CGGCGGGACATAGTGGCAGGGCGGCAGGGTCCGGGAGACCGCTAGGAGCG	GeneID:8993	NM_005091.1	51218163	6	0.17743	0.000659059	NA	NA	0.56531	0.387879	NA	NA
ZNF454	6220253	5	178301021	CGCTGATCGAATGCCCCAAACTTCCCGGAATGTATGTCTGAGATTTGATC	GeneID:285676	NM_182594.1	178300830	191	0.177113	0.000101372	NA	NA	0.468371	0.291259	NA	NA
KLF11	1470564	2	10100464	TTTGCAGACAGCGGGAGTCAGAGCTTATTGGCCTGAGTGTCCCGCTGACG	GeneID:8462	NM_003597.4	10101133	-669	0.177068	0.00751188	NA	NA	0.229691	0.0526236	NA	NA
HAND2	6370189	4	174686591	CGCCTGGCCACCAGCTACATCGCCTACCTCATGGACCTGCTGGCCAAGGA	GeneID:9464	NM_021973.1	174687169	578	0.176997	5.61123e-05	0.0757393	0.00573645	0.38072	0.203724	317.177	321.294
TLX3	650491	5	170668856	CGGGCCCGACAGGCTCTGTGTCATCTTTCTTGAACCGAACCTGGAGTTTC	GeneID:30012	NM_021025.2	170668893	-37	0.176621	0.000472853	-0.330641	0.109324	0.35591	0.179289	315.765	322.138
C10orf82	4560240	10	118419648	TGGGGCAGCCAAGGCGCGGAGGACAGCTCCGAGGCCAGATGTTTACTGCG	GeneID:143379	NM_144661.2	118419471	-177	0.176532	1.42525e-06	NA	NA	0.44732	0.270788	NA	NA
TBX20	5810487	7	35259655	GACAGCCGGGTAGCCCAACTTACCCAGGGGTTTGATTGTGTTCTCCGTCG	GeneID:57057	NM_020417.1	35259767	112	0.17627	0.000150903	0.138906	0.019295	0.368588	0.192318	343.131	340.777
ALX4	2000639	11	44282399	CGTCCGGGTGCAGGACGGCGCTCTTACCGCCCCACCCCAAACCGTTGCCT	GeneID:60529	NT_009237.17	NA	NA	0.176225	0.000498513	-0.0530417	0.00281342	0.288126	0.111901	336.039	325.337
HSPA12B	2350647	20	3661584	CGCTGCAGAGAGGGGCTTGCAGATCTGTCCCCACCAGACAAAGTCTGGAG	GeneID:116835	NM_052970.3	3661356	228	0.176015	4.27242e-06	-0.587944	0.345679	0.564298	0.388283	853.899	2065.74
SLC5A8	2680762	12	100127584	GGTGCCCAGGACAGTGACGGCTGACATGAAGCTAGCGGTGAGGGACAGCG	GeneID:160728	NM_145913.2	100128120	536	0.175804	5.27266e-06	-0.257581	0.0663478	0.397075	0.22127	1622.59	2456.03
DLX5	2650228	7	96490059	TTTGGAGACCTCGGTTAGCGTCTTCCCTGCCCAAGAGTCTGGCTTCTGCG	GeneID:1749	NT_007933.14	NA	NA	0.175795	0.00700447	-0.0234674	0.000550718	0.370912	0.195117	357.171	319.708
GPR27	7650632	3	71886029	GCCAGGCACAGGTCGAGCAGCAGGTAGTACGGGGCGCGGTGCAGGCTGCG	GeneID:2850	NM_018971.1	71885891	138	0.175769	0.00101403	NA	NA	0.267994	0.0922249	NA	NA
RGS5	2940086	1	161439664	CGGTCAAAGTCATAGATTCTTAGGACTGTAAGGGCTCCTGGAGATCGTTT	GeneID:8490	NM_003617.2	161439496	-168	0.175555	0.000158617	-0.395583	0.156486	0.502807	0.327252	1354.7	1792.37
GCM2	670739	6	10990029	GCGCACCTGTCCTTTTTTCTTCTATTTTTCAGAACCCTGGGCGGAAAGCG	GeneID:9247	NM_004752.1	10990084	55	0.175505	0.000591179	0.0479901	0.00230305	0.464829	0.289324	281.578	267.964
WT1	7000433	11	32406576	CGGAAGAAGGGGAGAAGGACTCCACTTGGTTCCGCTCGCTTACCCAGCGA	GeneID:7490	NT_009237.17	NA	NA	0.174895	3.51421e-06	0.0796554	0.00634498	0.61118	0.436284	475.888	377.119
HIST1H4F	5720273	6	26348899	CACGGAGCACGCCAAGCGTAAGACAGTCACTGCAATGGATGTTGTCTACG	GeneID:8361	NM_003540.3	26348633	266	0.174783	0.0065172	-0.0787601	0.00620316	0.282434	0.107651	329.885	319.549
FOXL1	510161	16	85170091	TGAGCGAGAGGTTGTGGCGGATGCTGTTCTGCCAGCCCTGCCGGTTGTCG	GeneID:2300	NM_005250.1	85169831	260	0.174613	0.0053839	0.289771	0.0839673	0.315577	0.140964	337.347	327.438
SMPD3	7150608	16	67038990	CGGGCCCGAGCGCGGGGGATTCCGAGTGTCAGTGCTTTCCTCCACCCGCG	GeneID:55512	NM_018667.2	67039905	915	0.174298	2.63585e-07	-0.240242	0.0577165	0.682592	0.508294	318.616	327.699
RUNX3	7380730	1	25130153	CGCATTTTGCAGGCCTCGTCGTGTTTTTCAAAGAGCCACAGGCCGCCACA	GeneID:864	NT_004610.18	NA	NA	0.174229	1.2788e-05	-0.00346845	1.20302e-05	0.460946	0.286717	1639.66	1750.41
GRIA4	5810356	11	104986719	CGGCTCGCGATGGATTGCTAAGGAGAACTAGTCATAATCTTAAACCACCG	GeneID:2893	NM_000829.1	104986935	-216	0.174183	0.000414599	0.0442042	0.00195401	0.243726	0.0695425	322.416	314.912
WFIKKN2	1070653	17	46267482	CGGACAGCTCTGTATCTCTGTGTCCAGGGCAGTTTGCGTCTTAAGTTCCA	GeneID:124857	NM_175575.4	46267839	-357	0.174116	5.01685e-07	NA	NA	0.553613	0.379497	NA	NA
KRTHB6	3060731	12	50981537	CGGCATTGACCATGTCAAACCCCGCAGGACAGAAAGAGCAGCAGCCCCGC	GeneID:3892	NM_002284.2	50981916	-379	0.173951	2.10409e-07	-0.0856785	0.00734081	0.744867	0.570916	647.086	377.622
HOXD10	1410128	2	176689900	CGCCAGCATGTACATGCCACCACCTAGCGCAGACATGGGGACCTATGGAA	GeneID:3236	NM_002148.2	176689746	154	0.173829	0.000662811	0.151922	0.0230804	0.415443	0.241614	359.901	296.965
LOC387758	7400435	11	26972448	GAGGAGTTCCAGTCACCGAGCGAGGGGCGCAAGGGTGGGTGCATCCTGCG	GeneID:387758	NM_203371.1	26972204	244	0.173775	7.7018e-05	-0.358487	0.128513	0.447387	0.273612	412.355	529.943
DLK1	2970717	14	100262647	CGCAGGAACACCGAAACACTTATCGCTGAAGTCCCGGGCACACGTGCAAT	GeneID:8788	NM_001032997.1	100262982	-335	0.173761	0.000435539	-0.0938904	0.00881541	0.498622	0.324861	518.396	337.345
GP1BB	7000180	22	18089755	AGGATCGGGATGGGGCTCTCCATGCGGCTGTCCTGGGTCAGTTTGCTGCG	GeneID:2812	NM_000407.3	18091066	-1311	0.173709	7.60811e-13	0.27612	0.0762424	0.805393	0.631684	2006.59	1126.06
TBX20	6980184	7	35260062	AGGGGATGCTCCAGGACCCCAGGACTTTGTGCAGTTGATGCTCGTTTCCG	GeneID:57057	NM_020417.1	35259767	-295	0.173706	4.58593e-05	0.146583	0.0214866	0.300736	0.12703	343.131	340.777
DLX5	6110521	7	96489047	TCTTAACAATGTAGAGCCTCCTCGGGGGTGAGCAAGGCCTGGTGTTCTCG	GeneID:1749	NT_007933.14	NA	NA	0.173589	0.000518627	0.117602	0.0138302	0.472491	0.298902	357.171	319.708
MAP3K14	5310754	17	40723392	CGAGCACTCGGGACTCTGCAGAATCATCAAGCAGGCCATCAACCTTCTGC	GeneID:9020	NM_003954.1	40724125	733	0.173507	1.08584e-08	-0.206735	0.0427393	0.826184	0.652677	573.753	618.434
NPAS4	2450554	11	65945321	CGGACAAGGTCCGGCTGTCCTACCTGCACATCATGAGCCTCGCCTGCATC	GeneID:266743	NM_178864.2	65945051	270	0.173402	8.2204e-06	NA	NA	0.504195	0.330793	NA	NA
PHOX2A	2680390	11	71633195	CGGCGCTCGTGTGAAGAAGTTAATTCAATTCGCTCTGATAACCGAGTTAT	GeneID:401	NM_005169.2	71632852	-343	0.173393	0.000543354	0.164811	0.0271627	0.253125	0.0797321	353.004	335.11
ART4	7050367	12	14887794	CGCCACCCTGGGTGTCTATAGGCTCATCTGGCCCTGCTGATAGGCCCTGC	GeneID:420	NM_021071.2	14887680	-114	0.173344	1.1208e-11	NA	NA	0.782436	0.609092	NA	NA
BAPX1	7560537	4	13154389	CGCAAGGGGCAGCGGTTCTCCCAACCCAGTCTAATGCACATTGGCCCAGG	GeneID:579	NM_001189.2	13155136	747	0.173298	0.000522413	0.0616769	0.00380404	0.307412	0.134114	467.37	335.513
PHACTR2	580338	6	143971204	CGGGCTGCAAAGGAAGCCAGCAGCTATGAAGAATTCATGCTTGATTTACC	GeneID:9749	NM_014721.1	143971093	111	0.173051	7.34363e-06	NA	NA	0.727089	0.554039	NA	NA
FLJ46831	3710187	10	129425888	GGGAAGTTACCAGCCACGTACTGGTAGATCTGGCTGAGCGTCAGCTTCCG	GeneID:399823	NM_207426.1	129425942	-54	0.172761	4.87479e-06	NA	NA	0.409627	0.236867	NA	NA
SOX1	3520523	13	111769787	CGCCGGTTCGGCTCGCAGGTGGAAAGTTTCTCCTGATGCACAAACCACTT	GeneID:6656	NM_005986.2	111769914	-127	0.172566	3.91012e-08	0.0447668	0.00200407	0.476452	0.303886	280.244	276.962
LPA	5360619	6	161020112	ACCTACCTGAGGATCAGTCCGGGAGCCAGCGTCTGGACAGAGCGGGGTCG	GeneID:4018	XM_926329.1	161020455	343	0.172301	1.17801e-05	-0.129629	0.0168036	0.501613	0.329313	325.746	328.925
FLJ23514	3130767	11	85763271	CGTGGTTAGAGTGGTAGTTTTTGTACCTTGGACAAATCTAGGAATGCCTT	GeneID:60494	NM_021827.2	85763426	-155	0.172053	0.000919775	-0.283626	0.0804435	0.426655	0.254602	405.248	452.278
OTX2	7560047	14	56346980	GCTCTCAGGGAGATTTGCTGAGAAAGCGCCTCTCTGGCAACTTTTTGACG	GeneID:5015	NM_021728.2	56346937	-43	0.171875	0.00103355	0.0580686	0.00337196	0.418127	0.246252	333.034	340.691
ANGPTL2	240767	9	128924278	CAGCTGGGGGTGTGTGCTGCTGGATCTCAGAGGGTCACTCCCTGCTATCG	GeneID:23452	NM_012098.2	128924865	587	0.171726	9.40649e-07	-0.124993	0.0156232	0.598138	0.426412	3186.53	1531.94
KCNC1	6130519	11	17714319	GTCGGCTGGGCAGTGCAGCTTGCCCGTGCGGTAGTAGTTCAGGATGTGCG	GeneID:3746	NM_004976.2	17714116	203	0.171546	9.20019e-08	0.0590789	0.00349032	0.570487	0.398941	359.064	371.824
TCTEX1D1	770754	1	66990441	GGCTACTTTACTTTGTCTTTGCGCTTCGGATTTCCTGTGCTAGGAAACCG	GeneID:200132	NM_152665.1	66990730	-289	0.171298	0.00185852	NA	NA	0.247021	0.0757232	NA	NA
CACNA1A	3930110	19	13477871	GGCAGCCCGGGGCGCAAAGGATGTACAAGCAGTCAATGGCGCAGAGAGCG	GeneID:773	NM_023035.1	13478317	446	0.171181	0.000385842	0.29822	0.088935	0.33492	0.16374	337.404	338.016
MGC52282	5260484	16	2832913	TTAAATCACTCCAAGTTATTGCCCACAGTGATGCTCCAAGTGTCCCATCG	GeneID:124221	NM_178453.2	2831850	-1063	0.171178	1.25392e-08	-0.125833	0.0158339	0.706479	0.535301	392.462	390.32
CLDN5	6020519	22	17893006	CGCGGGATTTCCGGGCATTCTTCTGCACAATGGCCCAGCCATTTCTCGAA	GeneID:7122	NM_003277.2	17892860	-146	0.171171	4.41006e-06	-0.237594	0.0564511	0.679545	0.508374	2418.15	6050.69
HOXB1	4070075	17	43963292	CGGGCCGACCCTCCTGCGGCCTTGACGCATGGACTATAATAGGATGAACT	GeneID:3211	NM_002144.2	43963271	-21	0.170847	2.23929e-08	0.0596814	0.00356187	0.678639	0.507792	338.254	334.968
EVX1	4050709	7	27248876	TCTTCTTTCTAAGCTGTCATCCTCCTGCTGCAATCGTCATTACAGTACCG	GeneID:2128	NM_001989.2	27248946	-70	0.170765	0.00133864	0.069306	0.00480332	0.265753	0.0949874	356.305	355.545
AQP1	6650441	7	30918265	TCTGGCAGCTGAGCAGCAGCCCCAGTGTGACAGCCGGGTTGAGGTGGGCG	GeneID:358	NM_000385.3	30917993	272	0.170665	2.2311e-06	-0.632478	0.400028	0.721155	0.55049	4811.98	12747.2
POU3F3	1510408	2	104838649	CGGCCATGGCCCCCTGCATGAAGTCGCTCTGGACCATCTTGACAGAGGAC	GeneID:5455	NM_006236.1	104838401	248	0.170642	0.000207241	0.133997	0.0179553	0.418116	0.247473	334.487	332.712
HOXB4	4250521	17	44010393	CGCCTCGCAGCGCTGGCCGGGCTCCGGGAGGAGGGCCCCGGCGGGTGGCG	GeneID:3214	NM_024015.3	44010742	349	0.170487	0.0157901	-0.213722	0.0456769	0.304082	0.133595	708.607	519.243
SFRP1	6550019	8	41285895	GGGACTGCGCCTTTTGTCCCCGGAGGTCCCTGGAAGTTTGCGGCAGGACG	GeneID:6422	NM_003012.3	41286137	242	0.170259	4.29561e-05	0.0112042	0.000125535	0.368768	0.198509	939.239	842.838
SMPD3	520377	16	67038988	CGCGGGCCCGAGCGCGGGGGATTCCGAGTGTCAGTGCTTTCCTCCACCCG	GeneID:55512	NM_018667.2	67039905	917	0.169766	7.60956e-06	-0.272958	0.0745063	0.652353	0.482587	318.616	327.699
PTPN20B	840634	10	48448112	CGCCGCTGTAAATTCCCTGCGGGCCCTGTGCACCACCCTGTGCGGGTCCC	GeneID:26095	NM_015605.4	48447930	-182	0.169559	0.000295585	NA	NA	0.599641	0.430082	NA	NA
HOXD4	7320746	2	176723290	CGTTGTCTATATATACCCTGTAGAACCGAATTTGTGTGGTATCCGTATAG	GeneID:3233	NM_014621.2	176724359	-1069	0.169522	0.00163529	0.273617	0.0748663	0.293318	0.123796	342.968	329.139
ACVRL1	50504	12	50587901	CGCACAGCTCCCATGACCCTACCTGAGACTTGGAGGGGAATGGACGAGAC	GeneID:94	NM_000020.1	50587469	432	0.169512	5.62084e-08	-0.504618	0.254639	0.734697	0.565185	629.71	1370.06
SOX14	4760372	3	138966169	CGCTGACCCCACAAAGTTCAGCTGATCATGCCAGTCCCAGCGCCCAGGCA	GeneID:8403	NM_004189.2	138966269	-100	0.169499	4.54704e-06	0.0408677	0.00167017	0.347652	0.178153	327.461	313.523
SLC34A2	6180170	4	25266527	CGCAACACCTTCGCCATATATACCCGGGGCGCTGCGCTCCACCTGGCCGC	GeneID:10568	NM_006424.1	25266571	-44	0.169435	0.00426777	-0.346795	0.120267	0.297066	0.127631	489.627	644.196
ZNF454	1230202	5	178300789	AGCAGCCCTGAGACTTGTGGGAATTCGGCCCAAGGGTTCCCAGGGCAACG	GeneID:285676	NM_182594.1	178300830	-41	0.169265	0.000190509	NA	NA	0.36085	0.191585	NA	NA
FBXO39	6380300	17	6620321	CCATGGAGTTGGCGTCGGAGCAACAGCTGCGCGGGCGGAGCAGGTAGGCG	GeneID:162517	NM_153230.1	6620296	25	0.169095	0.00191154	NA	NA	0.388465	0.21937	NA	NA
HOXA5	2710709	7	27149961	TTTGTTGTCCAGTCGTAAATCCTGCCTGATGACCTCTAGAGGTAAACTCG	GeneID:3202	NM_019102.2	27149812	-149	0.169075	0.000151759	-0.224535	0.0504161	0.389023	0.219948	2321.16	4528.21
CDH9	650291	5	27074539	CAGCGGCAATATCTTCCTATTTGAGGGACGTCTCTTATTAATCAGAAACG	GeneID:1007	NM_016279.2	27074431	-108	0.168971	0.000396677	-0.0740158	0.00547834	0.453903	0.284932	402.127	394.524
DRD5	7000519	4	9392029	CGGGGCAGCCTTGGATTACCCACAGACCCGAGTCCCAATCCGGACTTTAT	GeneID:1816	NM_000798.3	9392701	-672	0.168935	9.48042e-06	NA	NA	0.511998	0.343063	NA	NA
SSH3	4040332	11	66827898	GGGCTCGGGCTGGAGGGCGCTGGGGGCCTCGAGGGTCTCTGGTACTGGCG	GeneID:54961	NM_018276.2	66827577	321	0.168744	0.000249202	NA	NA	0.364935	0.196191	NA	NA
ONECUT2	3400731	18	53254351	TCAGCGTGGTGTAGGTGTTGCTCATGCCCATGCCAGGCGGAGACGAGTCG	GeneID:9480	NM_004852.1	53253915	436	0.168319	0.00117289	0.253031	0.0640247	0.367973	0.199654	357.819	348.729
SPON1	3450291	11	13941120	GGATACGGCTGCAGTAGCCCTCTGACTTGGGCACTTTGTCCAGGGTCTCG	GeneID:10418	NM_006108.1	13940814	306	0.168293	0.000512608	-0.167699	0.0281228	0.271899	0.103607	2802.23	4120.25
FBXW10	3840615	17	18588052	CGGTAAAGCCATGTTTCCAAGGAGGTCTGTACAAAAAGCCAGACTTCTGC	GeneID:10517	NM_031456.2	18588064	-12	0.168009	3.16743e-06	NA	NA	0.641545	0.473536	NA	NA
PCSK6	1410603	15	99847229	TGGTTGGTGTAGACGGGGCGCGGCGGGGGCGGAGCAGGCGGCAGGCAGCG	GeneID:5046	NM_138320.1	99847710	481	0.167836	0.017145	NA	NA	0.39099	0.223155	NA	NA
WT1	6480427	11	32408614	GAATGGAGAAGGGTTCGTCTAGAGAAAACTTCTTCGTAGCTTCTATTTCG	GeneID:7490	NT_009237.17	NA	NA	0.167574	6.26341e-05	0.219177	0.0480387	0.560685	0.393112	475.888	377.119
RASGRF2	6420133	5	80292420	GAAGAGCACATTCTGGTAGAGGGCGAACCACTTCTCGTGCCAGCGGCTCG	GeneID:5924	NM_006909.1	80292314	106	0.167408	0.000794175	-0.196024	0.0384253	0.235887	0.0684799	409.962	399.675
TAOK2	3930021	16	29892166	GCTGTGACATAAATGCACTGTGACCTTGGCAAGTCTTGCAACCTGCAGCG	GeneID:9344	NM_004783.2	29892723	-557	0.167363	5.88881e-08	NA	NA	0.528076	0.360713	NA	NA
DISP1	7050553	1	221168471	CGGCAACTGACTGCAGGATCACAGCACAGCAGAAAGCAATGAGTTGGCAG	GeneID:84976	NM_032890.2	221168406	65	0.167344	0.000133494	NA	NA	0.591536	0.424192	NA	NA
CBLN4	940634	20	54013603	CTTTCAGGGGCTGAGGGGCCTCGAACCTTGCCAATCACCAGTGCTGTGCG	GeneID:140689	NM_080617.4	54013419	-184	0.167288	1.58912e-05	NA	NA	0.355458	0.188169	NA	NA
SLC6A2	510167	16	54247366	ACTGGTTCTGGCCGTGCCTGGCGGGGGCCGGGCTGGTAATGTAGCCTGCG	GeneID:6530	NM_001043.2	54248057	-691	0.166796	0.00189044	0.00981953	9.64231e-05	0.333737	0.166941	328.61	307.007
SNRPN	160253	15	22644614	CGCCCGCTGGGAGTGTCTTATCAGCCGCTTATACCGCGGAAACTTTAACC	GeneID:6638	NT_026446.13	NA	NA	0.166793	3.91043e-05	-0.155198	0.0240865	0.673448	0.506654	1569.16	1823.61
GPR75	3170196	2	53940847	TTTGCTGTTTGGGGAACTCAAGCTCCCTGAAATAGCCAAAACCTGAAACG	GeneID:10936	NM_006794.1	53940572	-275	0.166438	1.19907e-05	-0.0220051	0.000484224	0.645387	0.478949	322.036	310.523
ZNF702	4230367	19	58188507	CGGAGCGCAGACATAACACAACACAGAGCAAAACTCACCGCTGCGGTGAC	GeneID:79986	NM_024924.3	58188596	89	0.166321	0.00764379	NA	NA	0.261324	0.0950028	NA	NA
FLRT2	7570768	14	85066248	CGTTCGAAACCTGTCGCCGTCACTTGCGCGTTTGGCATTATCCATTGTCA	GeneID:23768	NM_013231.4	85066241	7	0.166275	0.001031	-0.167333	0.0280005	0.306561	0.140286	1938.24	1432.31
LAMA2	1430762	6	129246315	GAGAGTTGCTGTCTGTGGACTGCCGTCTTGCTTCGCCTTCAGAGAGTGCG	GeneID:3908	NM_000426.2	129246035	280	0.165686	0.00543583	-0.387583	0.15022	0.303641	0.137955	1154.49	1443.74
NTRK3	770035	15	86601628	CCCCAGACTCTAGATTACGGAAATGAGTGTCATTCAGACCAAGGACTGCG	GeneID:4916	NM_001007156.1	86600665	-963	0.165639	0.000823751	0.0100647	0.000101298	0.265085	0.0994459	402.33	526.149
RTP1	630682	3	188398014	CGGTCTAAAAATCCTCATCGACAAGACCAGGAGGAAGCAGGACCCAGCTC	GeneID:132112	NM_153708.1	188398002	12	0.165545	6.53713e-06	NA	NA	0.610894	0.445349	NA	NA
GPR75	7160544	2	53940532	GAGGCGGTGGCGATGGCGATGATGCCTCTAGTCCTGCATCATCCAGAGCG	GeneID:10936	NM_006794.1	53940572	40	0.165541	1.08671e-05	-0.00752676	5.66521e-05	0.736216	0.570675	322.036	310.523
HOXD4	4250360	2	176723316	ATATTCCCCTAGAATCGAATCTGTGACTATACGGATACCACACAAATTCG	GeneID:3233	NM_014621.2	176724359	-1043	0.165525	0.000497742	0.283868	0.0805811	0.276433	0.110908	342.968	329.139
RGS5	6370736	1	161439273	CGGAGGAGCTAAGCCACCTGCCAAAATGTGCAAAGGACTTGCAGCTTTGC	GeneID:8490	NM_003617.2	161439496	223	0.16549	3.63016e-09	-0.250679	0.0628398	0.691972	0.526482	1354.7	1792.37
ZNF540	360494	19	42733963	AGGAGGCACTGAGGTCAGGACTGTCAGGGTCCTGCGCTGCTGGTCTCACG	GeneID:163255	NM_152606.2	42734148	-185	0.165376	0.000318589	NA	NA	0.451846	0.28647	NA	NA
VSX1	2060240	20	25011817	TTGAATAATCAGTGAAACTCTGATATTCGCTAAAGTTGGCCCCAAGCACG	GeneID:30813	NM_014588.4	25010767	-1050	0.165158	0.00332502	0.0605964	0.00367192	0.268305	0.103147	348.521	351.71
HIST1H3E	7320719	6	26333368	CGCGCCATAGTTCATCTGCAAAGTAAATGAGTTAGGAAGATTGGTTTGCC	GeneID:8353	NM_003532.2	26333362	6	0.164944	2.62232e-08	0.289594	0.0838645	0.842177	0.677233	360.391	330.249
SKIP	1260041	2	228754650	AGGATAAGTCTGTGGTGCTAGGACCCAGCTCCCAGAGTGCCAGACTGGCG	GeneID:80309	NM_030623.1	228754586	-64	0.164759	3.2599e-06	0.117229	0.0137427	0.464254	0.299495	356.526	359.439
FLJ21511	2630255	4	48682772	TGGGCCTAGTCTAAACGAGGGCACCACTGGTCCGGAGTTGCACTTGTTCG	GeneID:80157	NM_025087.1	48683022	-250	0.164331	9.14221e-05	-0.132503	0.017557	0.449404	0.285072	379.312	465.286
NTSR1	4280215	20	60810316	CAGGGCGGGCTGGGGTGAGCGCTCCAGGGAACCAGGATTCCGAGCGGGCG	GeneID:4923	NM_002531.1	60810634	-318	0.163908	2.51864e-06	-0.0689001	0.00474723	0.332679	0.168771	330.288	313.561
HOXD3	4850717	2	176737319	TACTGTAATGCACCCTGTATTTAAGGCACTGGGCTTGCCCCATTAAAGCG	GeneID:3232	NM_006898.4	176737051	268	0.16371	0.00138721	0.284862	0.0811464	0.382756	0.219046	443.808	400.526
CCDC37	4730372	3	127596397	CTCTTGGGTTTACGTCTCCAAGGCAACCATTCTTCAGGCTGGCTGTGACG	GeneID:348807	NM_182628.1	127596472	-75	0.163574	0.00155509	NA	NA	0.337228	0.173654	NA	NA
CNNM1	6940129	10	101080548	CGGCACAACATTGTGGACATTTTATTTGTCAAGGACTTGGCCTTCGTGGA	GeneID:26507	NM_020348.1	101080023	525	0.163526	1.01764e-09	0.219584	0.048217	0.725708	0.562182	418.163	377.435
PHACTR2	1660594	6	143970993	CCTTGCTGGCACACTGAGCATACTTCATGCACTGTCTGCAGGAGACACCG	GeneID:9749	NM_014721.1	143971093	-100	0.163248	3.88801e-05	NA	NA	0.552301	0.389053	NA	NA
CDKN2A	1940242	9	21958681	CGCCCTTTGGTTATCGCAAGCTGGCTGGCTCACTCCGCACCAGGTGCAAA	GeneID:1029	NT_008413.17	NA	NA	0.162843	0.00119112	0.251918	0.0634627	0.366714	0.20387	318.905	313.448
CART	4610753	5	71050656	CGCAGAGAACAGGACCCTGCGCCCCCAAAGGCTGTCAGTCTCACGGCAAG	GeneID:9607	NM_004291.2	71050750	-94	0.16249	1.29729e-06	0.00178746	3.19502e-06	0.490149	0.327659	370.133	355.679
RNASE1	290369	14	20340764	CGGCACCTGAGAACACCTCTTGGGCTGCTTACCTGGATCTGCAGCTTGGT	GeneID:6035	NM_198232.1	20340876	112	0.162299	0.000396023	-0.0401876	0.00161504	0.61982	0.45752	301.924	293.896
HCN1	2850719	5	45731679	CGGCTTCATGCAGAGGCAGTTCACCTCCATGCTGCAGCCCGGGGTCAACA	GeneID:348980	NM_021072.1	45731977	298	0.162044	0.000113392	0.0733476	0.00537987	0.365827	0.203783	323.996	320.177
NEFH	2260255	22	28206534	ACGCTGAGCAACGGGCCGGAGGGCTGCATGGTGGCGGTGGCCACCTCACG	GeneID:4744	NM_021076.2	28206219	315	0.161859	7.49309e-06	0.0751548	0.00564825	0.544608	0.382749	811.039	399.641
GHSR	7320202	3	173649614	CGCAGTTATAGGACCCAGGTTCAGCGATGTGACTACTTGTCCAAGGTCAC	GeneID:2693	NM_198407.1	173648897	-717	0.161714	0.00536348	-0.0402339	0.00161877	0.309426	0.147711	287.752	288.429
CMTM8	5960477	3	32254265	GAGGTCCAAAAACTAGAGCCACTCGCTCTGGGTCATACAGCCGATAAACG	GeneID:152189	NM_178868.3	32255175	-910	0.161712	8.00576e-05	NA	NA	0.59504	0.433328	NA	NA
SSTR4	1430669	20	22963906	CCAGGGCTGGGTGAGGCGCTGACCCCCAGGAGCTGGGGTGCCGAGGGGCG	GeneID:6754	NM_001052.1	22964121	-215	0.161558	0.000377433	-0.00435225	1.8942e-05	0.429807	0.268249	323.397	334.931
CDKN2A	6590747	9	21958832	CGAGATTAGAGAGGAAGGCAGAAGCCAGAGCACATGAATAAATGAGCATC	GeneID:1029	NT_008413.17	NA	NA	0.161537	0.00397709	0.217867	0.0474661	0.323789	0.162252	318.905	313.448
CASP2	6900437	7	142695141	GGCTGTGATGTAGGTTTCGGTCGCTGGAAGCTGCTAAACCATAGCTGACG	GeneID:835	NM_001224.3	142695524	-383	0.161476	0.000514828	-0.170908	0.0292094	0.505509	0.344033	292.825	303.723
SLC15A2	3190682	3	123095646	GAACACAACACCTCGAGCACAGATTGAAAAACTGATTCCATGGTCAGGCG	GeneID:6565	NM_021082.2	123095977	-331	0.161454	0.0011832	-0.0567468	0.0032202	0.701162	0.539709	682.623	809.612
CPXM2	4610152	10	125641024	GGACCCTGATTATTACGGGCAGGAGATCTGGAGCCGGGAGCCCTACTACG	GeneID:119587	NM_198148.1	125641490	466	0.161345	6.07092e-06	NA	NA	0.476327	0.314982	NA	NA
MTNR1B	7510487	11	92342296	TGGGCTCGGGGTGGCAGAGACAGCTGTGCGGTCCCAGCTGTTCCTGAGCG	GeneID:4544	NM_005959.3	92342437	-141	0.161247	7.07347e-07	-0.190155	0.0361588	0.600154	0.438907	298.832	296.394
PCDHGB4	5960634	5	140747439	CGCGCTTTCCAGGGCAGCCCCAGCTCAGACTCCCCAGCGCCAGCCTTTAC	GeneID:8641	NM_003736.2	140747636	-197	0.161213	0.00113309	-0.229073	0.0524745	0.356616	0.195403	348.388	340.903
GCM2	6420719	6	10990224	GAAGCTGGGGACAATGGTTATGGACCCGGGCGGGGCCTTGTCCTTGGCCG	GeneID:9247	NM_004752.1	10990084	-140	0.161151	0.00486103	0.0429729	0.00184667	0.254631	0.0934803	281.578	267.964
OTP	270608	5	76970702	GCAGAGCAGGGGTCAGAGCGGGCCATGACCCTGGCGTGACCTGAGGGTCG	GeneID:23440	NM_032109.2	76970278	-424	0.16102	0.000501239	0.203199	0.0412898	0.218767	0.0577463	352.121	334.477
EPB41L3	6560343	18	5533801	AGGAAGAGCCCGAGGCCTGGGGCGAGGCGCGCGGGACAGTGGGGCTGACG	GeneID:23136	NM_012307.2	5533986	185	0.160772	0.000293433	NA	NA	0.468403	0.307631	NA	NA
LOC126248	3180520	19	38314931	GAGGGTGGCGGCAACTTGCATTCCCTGTCATGGGCTGTCGGGGAGCACCG	GeneID:126248	NM_173479.2	38314853	78	0.160618	2.42574e-07	0.0574087	0.00329576	0.764329	0.603711	336.012	341.068
COX7A1	5420523	19	41335611	CGTGAGGGCTAAGGCAGGATCTTTCTCAGAGATTTGTTGAGACATTAAAT	GeneID:1346	NM_001864.2	41335611	0	0.160574	0.00230496	-0.511671	0.261807	0.519466	0.358891	1159.01	2564.53
HCA112	110110	7	150128010	CTGGCTGGAGCCCTACGGTGGGGTGGCTCCTGGGACGGGGCCAGGGAGCG	GeneID:55365	NM_018487.2	150128787	-777	0.160535	2.04698e-05	-0.0638185	0.0040728	0.463917	0.303383	1050.4	680.266
EDNRB	4730184	13	77390917	AAAGTAACTCAAGTTTGCGCGCCAGTGGGAAACTTGGCGCTCATGACTCG	GeneID:1910	NT_024524.13	NA	NA	0.160363	0.000158332	-0.33809	0.114305	0.28031	0.119947	565.929	1500.17
LAMA2	3170040	6	129245899	CGCCTTCCATGGGCACGCGGCCCCAGGACGGCCCTCTATTAAAGGATCCT	GeneID:3908	NM_000426.2	129246035	-136	0.160284	0.00314722	-0.381206	0.145318	0.323334	0.16305	1154.49	1443.74
ZNF542	2630041	19	61571383	CGCGTACTTTGTGTCCCAGGTAGCTCGTCTCTTAGCCATGTACGCCTCTG	GeneID:147947	NM_194319.1	61571320	63	0.160195	0.0188429	NA	NA	0.204624	0.0444288	NA	NA
PAX9	580669	14	36200064	ACAGTGGCTGAATGTGGCAGAGCCTTGGGCTCCGTAGTGAGTGCCCCACG	GeneID:5083	NM_006194.1	36200656	-592	0.159903	0.000947789	0.171184	0.029304	0.410188	0.250285	387.524	325.516
NPTX2	1570544	7	98084588	CGGGGCAGAAGTCTCCTGCCGTCTCACAGCCGCACCCACCGCGCTGCTCG	GeneID:4885	NM_002523.1	98084545	43	0.1598	1.4404e-05	-0.0907393	0.00823361	0.442092	0.282292	1159.32	360.899
FOXG1B	7150097	14	28306074	TTCTAATTCCTGAGGGGTGGTTGCTGCTTTTGCTACATGACTTGCCAGCG	GeneID:2290	NM_005249.3	28306038	36	0.159634	0.00100668	0.0123728	0.000153085	0.332307	0.172673	702.748	352.856
MT1G	70671	16	55259635	CGGCCTGGGCTGTGCGCAGGAGATGGGCCAAGTGCAAGGTCCCTTGAGCG	GeneID:4495	NM_005950.1	55259478	-157	0.159254	0.000586081	-0.106871	0.0114215	0.334262	0.175008	1096.93	1606.17
FLJ21511	630739	4	48683078	TCGGTTCGGCAAGTGGGTCAGTTGGCTGGGGCTCACTTGGCAACGGGACG	GeneID:80157	NM_025087.1	48683022	56	0.158746	0.000739121	-0.105142	0.0110549	0.293399	0.134653	379.312	465.286
AMBP	3450240	9	115880256	CGCTGGCCCTGTGCCAACGCCGCCCGACAACATCCAAGTGCAGGAAAACT	GeneID:259	NM_001633.2	115880536	280	0.158707	3.32604e-06	-0.0233165	0.000543659	0.675686	0.516979	542.446	380.704
HOXC11	5260440	12	52653176	TCTGCGAAGTGCTCCGAACTGATATATGACAATATCTACTTTGGATCACG	GeneID:3227	NM_014212.2	52653196	-20	0.158677	0.00206193	0.00148372	2.20141e-06	0.39826	0.239582	368.78	350.764
WT1	2940356	11	32413335	AGAGCAGCAGGGAGTCCGGGACCCGGGCGGCATCTGGGCCAAGTTAGGCG	GeneID:7490	NM_000378.3	32413663	328	0.158455	0.00092997	-0.00593351	3.52066e-05	0.270543	0.112088	475.888	377.119
GALR1	4230100	18	73092352	CGCAAGCCAATGGCACGCTCCAGCAGCGGCCAGGAAGCCTCTCTGCACAG	GeneID:2587	NT_025004.13	NA	NA	0.158373	2.09471e-06	-0.17899	0.0320375	0.414641	0.256267	316.911	326.483
C10orf82	2940059	10	118419442	GGCAGGGATCCTGGGCGGCCGGGCAGAGGCCAAGTGGGCACCGGATAGCG	GeneID:143379	NM_144661.2	118419471	29	0.157923	1.36217e-07	NA	NA	0.703405	0.545482	NA	NA
C1orf87	5820736	1	60312259	CGGGCGTCCTTCTAGAAGCCCATCTCGCTCACCTGTGTGGTCACCCTTGT	GeneID:127795	NM_152377.1	60312014	-245	0.157848	0.00709002	NA	NA	0.322165	0.164317	NA	NA
HSPA2	1070201	14	64077265	GCTGGTAGTGCCCGTGGTGCTTGGTTCGAGGTGGCCGTTAGTTGACTCCG	GeneID:3306	NT_026437.11	NA	NA	0.157793	0.0254728	-0.130026	0.0169067	0.251883	0.0940905	928.213	724.211
PAX9	3370554	14	36200048	CGGAGCCCAAGGCTCTGCCACATTCAGCCACTGTCCTGGGCCCCTGGCCC	GeneID:5083	NM_006194.1	36200656	-608	0.157785	0.00362844	0.187821	0.0352767	0.374736	0.216952	387.524	325.516
PCDHGB7	2710348	5	140777470	GAGTCCCGGGTCTCGGAGCTGGCAATCTGGTGTGCTGGGCAAGGTCTGCG	GeneID:56099	NM_018927.2	140777466	4	0.157778	0.00218178	-0.119089	0.0141822	0.3467	0.188922	340.235	336.427
MYCL2	6860360	X	106402474	AGTCTGCTCCAGGTGGCAAGCTGCGTGAGCAAGCAAGCCAACATGGACCG	GeneID:4611	ENST00000372451	106402468	6	0.157582	0.012433	NA	NA	0.349246	0.191664	NA	NA
SPDY1	450095	2	28887401	AGGACGAGGCTGGAGCGCTGCCTTCTCATCTAAGGCGGGCGGTGGGGTCG	GeneID:245711	NM_001008779.1	28887221	180	0.157566	0.000921334	NA	NA	0.28816	0.130594	NA	NA
RASSF1	1070291	3	50353429	CGCGCCCAGCCCCGCCTTCGGGCCCCACAGTCCCTGCACCCAGGTTTCCA	GeneID:11186	NM_007182.4	50353371	-58	0.157488	0.0253506	-0.272737	0.0743855	0.185736	0.0282478	1462.7	2474.03
C21orf84	1070377	21	43723567	CGGCTGCCCTGTTGCACTGATGTCCTGGCCCCTGAGAACACATCAGTAGG	GeneID:114038	NM_153752.1	43722531	-1036	0.157476	2.45181e-13	0.0472682	0.00223428	0.809598	0.652122	320.3	310.855
GATA4	1690402	8	11600092	GGAAAGAGCGTGGTGGGGGACCCGCGGCCGATGGAATCCCTGGGGCAGCG	GeneID:2626	NT_077531.3	NA	NA	0.157444	0.000505107	-0.0847298	0.00717915	0.301469	0.144026	344.85	314.791
PCDHB15	4230703	5	140605243	GTGTCTCCGGAGAATGCTATTCTCCTACATTTCCGAACAGGTTATCAACG	GeneID:56121	NM_018935.2	140605331	-88	0.156932	0.000971774	-0.200454	0.0401818	0.395416	0.238484	504.773	502.811
AJAP1	2850037	1	4615380	CGCTCACCTGAGTCCTAAAAGCTGTTGAATCCACATGGTCACGTTTCGGG	GeneID:55966	NM_018836.2	4614965	415	0.156807	0.00818599	NA	NA	0.286938	0.130131	NA	NA
TCN2	6040333	22	29333587	TATATGTTTGACTCCTCACCAGACAAGATCTCCGTTAATTCAGTCATTCG	GeneID:6948	NM_000355.2	29333161	426	0.156804	1.3625e-09	-0.150266	0.0225798	0.80518	0.648376	2233.64	2017.83
INPP5B	7100682	1	38185331	CGCCACATGGTGGTCAGTCAGCCTGCAAGTCCCAGCATGCCCGAGTCAAT	GeneID:3633	NM_005540.1	38185280	-51	0.156249	0.00724726	-0.0218944	0.000479367	0.278191	0.121942	329.497	324.243
STMN2	70431	8	80686016	CGTCTGCACATCCCTACAATGGCTAAAACAGCAATGGGTAAGGCACTGCG	GeneID:11075	NM_007029.2	80685935	81	0.156085	0.00246611	0.0562986	0.00316953	0.386506	0.230421	492.355	330.819
WDR40B	6380139	X	125514720	GGGCAGAGTCTAGGAGGGCCCGCAAGCCAGGATCCCAAGTATCAGACACG	GeneID:139170	NM_178470.3	125514515	-205	0.156046	0.00218268	NA	NA	0.473928	0.317882	NA	NA
FLJ36070	2100747	19	53911914	CGCATATCCCGCCAACAACTGCAGCTCCCACCAGCCTGCCAGGCCAGGCT	GeneID:284358	NM_182574.1	53912026	112	0.156009	0.00104693	-0.103721	0.010758	0.584473	0.428463	358.329	328.277
RENBP	6860367	X	152864903	CGCGGTATTTTCAGATAAACACCAGAGGCATGACTGATGTGGCCCTTGCC	GeneID:5973	NM_002910.4	152863426	-1477	0.155861	0.000149322	-0.184296	0.0339649	0.663341	0.507479	727.393	1017.82
ALX4	2230014	11	44281834	GCGGGTTGGGGTCAGGTGGAGAAGCCGCTCTTTGTTAAGGTGACAGAACG	GeneID:60529	NT_009237.17	NA	NA	0.155355	0.0309826	-0.0424209	0.00179953	0.373664	0.218309	336.039	325.337
PTPN20B	7000368	10	48448115	AGGGGGACCCGCACAGGGTGGTGCACAGGGCCCGCAGGGAATTTACAGCG	GeneID:26095	NM_015605.4	48447930	-185	0.155216	3.54497e-05	NA	NA	0.687779	0.532562	NA	NA
GALR1	2750093	18	73090775	GGGGCTTCTCTGCTGCAACTGAGAGGCGAAAACAGCTCGGCTGAAATCCG	GeneID:2587	NM_001480.2	73090721	54	0.155174	0.000811307	-0.129041	0.0166515	0.268952	0.113777	316.911	326.483
POU4F2	7510367	4	147779576	AGCGGAGTCAGGCATCCGTTCAGACTGACAGCAGAGGCGGCGAAGGAGCG	GeneID:5458	NM_004575.1	147779538	38	0.155083	0.0022172	-0.13612	0.0185288	0.322831	0.167748	303.303	298.306
PKMYT1	3460435	16	2971708	CAGCTGAGGACGCTGGGATGATCCCCTAAAGTGATTAGCAGGGGCCCTCG	GeneID:9088	NM_182687.1	2970475	-1233	0.154945	9.04236e-09	0.162725	0.0264795	0.568667	0.413722	359.015	317.73
CDH8	2070561	16	60627307	CGGATATCGCGAAAGACACAGCTTAGCCCAGAGCCTATGCTAAGAACCCT	GeneID:1006	NM_001796.2	60627537	230	0.154798	0.000444767	-0.239596	0.0574062	0.308363	0.153565	344.256	320.117
C10orf26	4220739	10	104525844	ACATCCTCCTCAGTATTCCAGTGCAGCTGTCTGAAGTTTTTTCTGCTGCG	GeneID:54838	NM_017787.3	104525996	-152	0.154691	0.00063434	NA	NA	0.404091	0.2494	NA	NA
NPY5R	5910671	4	164485195	CATTTGTTATATGAAGACACCTCGCAAACAGGAGCGCAAACCTTAGAGCG	GeneID:4889	NM_006174.2	164484541	654	0.153882	0.000662811	-0.213216	0.045461	0.29182	0.137938	335.942	365.318
ZNF541	4200402	19	52740395	CGGTCCCTGCCAGTTCCCAGCCATCGAGCCACAGCTTCCAGTGGCTCCGG	GeneID:84215	NM_032255.1	52739966	-429	0.153867	0.00318779	NA	NA	0.419786	0.265918	NA	NA
WT1	380025	11	32411294	CGCCACCTTTGTTTAGCAGGCTGGTGTTACTTTTGGGGAGTTTCTAGGTC	GeneID:7490	NT_009237.17	NA	NA	0.153856	2.80785e-05	0.136059	0.0185121	0.503519	0.349663	475.888	377.119
SPARCL1	840377	4	88669530	GAATTAGCTCTTTCCCTTTTGGTTTGCAAGCACTGCCTGTAAAGCCCTCG	GeneID:8404	NM_004684.2	88669530	0	0.153801	0.000249202	-0.482959	0.23325	0.534923	0.381122	1315.03	2765.18
ADHFE1	3780605	8	67507194	CGGGGTCACCTGTCTAAGCCTCAAGCCAGTCGGGCTCAGGGCCATTTTCC	GeneID:137872	NM_144650.1	67507288	-94	0.153133	0.0205691	-0.50433	0.254349	0.1991	0.0459672	1019.67	1943.58
C20orf175	3390411	20	48687117	GGGTGGTCCAGGCAAGTTGTGTGACCATCCTGGGCTTAGTCTTGACATCG	GeneID:140876	NM_080829.1	48686833	-284	0.152867	5.42167e-11	0.122113	0.0149115	0.736345	0.583478	368.222	340.413
GPR25	7150433	1	199109052	GCTGGTGGATACCTTCGTGCTGCACCTGGCGGCAGCTGACCTGGGCTTCG	GeneID:2848	NM_005298.2	199108789	263	0.152683	0.000344466	-0.0734642	0.00539698	0.524407	0.371724	319.704	324.591
CPEB4	6550482	5	173249354	CGGGTTTGGAGTGCTAGTGCAAAGCAATACTGGGAATAAATCTGCTTTTC	GeneID:80315	NM_030627.1	173248795	559	0.152577	2.84042e-08	-0.0595037	0.0035407	0.574223	0.421647	1260.1	1091.2
C20orf55	1450639	20	764362	CGCTGGTGCCCTGGCCTGCCCAGGAGTCAGCCTTGCTCAGGGTGGCCTTG	GeneID:83541	NM_031424.3	764711	-349	0.152466	4.65226e-05	0.0573782	0.00329226	0.380189	0.227723	1623.2	1239.46
GATA4	6220608	8	11599029	GGCGCTGACTGGCCTGTGGGAGTCACGTGCAAGGGCGGGGCGGGGGTGCG	GeneID:2626	NT_077531.3	NA	NA	0.152383	0.0119047	-0.0362576	0.00131461	0.230142	0.0777584	344.85	314.791
TAL1	6380091	1	47468062	GGGGGGACTTCAAGGTTCTGTCCCACCGACCAGAGTCTGAAGACTATTCG	GeneID:6886	NM_003189.1	47468030	-32	0.152264	0.000604098	-0.438309	0.192114	0.370873	0.218608	455.34	744.915
C1orf177	540519	1	55044265	GGACCCTGAAAATGTGCACGGACAAGTTAAAAATCAGCGGGCTACGTGCG	GeneID:163747	NM_152607.1	55044324	-59	0.152097	3.60318e-10	NA	NA	0.859837	0.70774	NA	NA
WT1	4850719	11	32407062	CGAGTTTTATACTTAATTTGCCAGGGGTTCGCTGCAGAAGCGGCAGAGAC	GeneID:7490	NT_009237.17	NA	NA	0.152005	0.0198379	0.20513	0.0420785	0.32969	0.177685	475.888	377.119
UGT3A1	5670064	5	36026972	ACAATATCTACACTGGGTGAGTGCTTGGCCGGAGAATTCCCAGACAGGCG	GeneID:133688	NM_152404.2	36027256	284	0.151831	0.000633045	NA	NA	0.31193	0.160099	NA	NA
PAX7	1940470	1	18829819	AAATATTCGTTGGCGATTTCTTTTCGTTATTGGTCCTCCGCTCCCTTGCG	GeneID:5081	NM_002584.1	18830087	-268	0.151759	0.00102549	-0.0818993	0.0067075	0.329965	0.178206	348.674	360.136
LIN7A	2850075	12	79855849	TCTTCAGTTGCGGTGCGGAGCTGAGCAGGTATCCGAGAGCGACTGCATCG	GeneID:8825	NM_004664.2	79855825	-24	0.151546	0.00552577	-0.211866	0.0448873	0.272832	0.121286	356.185	390.194
SLC22A18	5130093	11	2886898	CCCCGTCCAGGGGCTGCCCAGGCGGGGCTGACCAGGGAGGCTGGAGTGCG	GeneID:5002	NT_009237.17	NA	NA	0.151518	1.39205e-09	NA	NA	0.745865	0.594347	NA	NA
TFAP2B	430184	6	50893111	CTTTAAATCCAGGACTGCTGTGTGCAGCTCTGCGCGAACAGGGATGGACG	GeneID:7021	NM_003221.2	50894542	-1431	0.151508	0.00200681	0.406139	0.164949	0.350278	0.19877	349.604	325.132
CA3	1170497	8	86537833	AGGCTGGCTGTCTGGCTACGATCTCTGGACACTTGTGCGAGTTTATTTCG	GeneID:761	NM_005181.2	86537710	123	0.151453	0.00427012	-0.25565	0.0653571	0.25636	0.104907	463.32	721.781
ZNF553	3440110	16	30313623	AGAGACCCTGAGCCAGAGACTCACATCAGAGCCCTGAGTCACAGAGGACG	GeneID:197407	NM_152652.1	30314558	-935	0.15142	5.59603e-05	NA	NA	0.458133	0.306713	NA	NA
OSTalpha	6380682	3	197428110	CGGCCGCACTCAGAATGAGACAGGACTGGAAATGCTCTAGCTGTTCCTAG	GeneID:200931	NM_152672.3	197427780	330	0.151274	1.04585e-05	-0.00266867	7.12182e-06	0.613386	0.462113	380.464	324.301
BLZF1	6620670	1	167602426	TCCATCCATCTTTGCTCTTGATCTCATTTGCTTCCATCTGTTACATTTCG	GeneID:8548	NM_003666.2	167603818	-1392	0.150826	3.58295e-15	NA	NA	0.851913	0.701087	NA	NA
SFRP1	6480484	8	41285326	CGCCGCCCAATGCCACCGAAGCCTCCAAGCCCCAAGGTAAGGCTGCCTCC	GeneID:6422	NT_007995.14	NA	NA	0.150473	0.00431558	-0.128932	0.0166235	0.250223	0.0997494	939.239	842.838
TRHDE	4730647	12	70953243	CGCCTGTCGGGCCACCTGAAGCCGCTGCACTACAATCTGATGCTCACCGC	GeneID:29953	NM_013381.1	70952730	513	0.150417	0.000483239	-0.261555	0.0684112	0.376619	0.226203	326.298	408.827
KIAA1944	3390504	12	128953814	GAGGATCTGCGCTCCGGGTCTCCAGGATGTGCCCGTCTGAGATGGGGACG	GeneID:121256	NM_133448.1	128954166	352	0.150262	0.000177699	-0.0123124	0.000151594	0.292756	0.142494	403.338	373.201
SFRP2	50131	4	154929985	CGGGGTGCCCTGCGTGCCCCCCACTCCCGCAGCCCGCGCCCTGCTCGCTC	GeneID:6423	NT_016354.18	NA	NA	0.15018	0.00310552	0.0246725	0.000608733	0.30235	0.15217	4753.53	2030.43
HLF	3870474	17	50696658	CGGGAGAGACACAGACACACTGAACGGGATTTTAGGAATATTTACTCTGG	GeneID:3131	NM_002126.3	50697370	-712	0.150085	0.00399481	-0.189995	0.036098	0.347462	0.197377	545.749	1096.72
HIST1H4F	460392	6	26348558	ACTTTTGCAACTTTGCTACACACTGAAGCCCCTTATATATCAATTATGCG	GeneID:8361	NM_003540.3	26348633	-75	0.149968	0.0100365	-0.0688066	0.00473436	0.232849	0.0828814	329.885	319.549
KCNG3	5570491	2	42573830	CGCCCTCCAGGCCCCAGTAGATCATCTCGTTGTAGAAGGAGAGCTCGCAC	GeneID:170850	NM_133329.4	42574741	911	0.149864	0.000204223	-0.153232	0.0234802	0.430644	0.28078	347.545	329.041
ZNF677	4290301	19	58449722	AAGGTCGGGGCCAGTACCCACTTCAGAACGATTTTAATCCGAAATGGACG	GeneID:342926	NM_182609.1	58449923	201	0.149857	0.00337647	NA	NA	0.217788	0.0679315	NA	NA
SCRT1	2940075	8	145530600	CGCAGGAATCATGCCCAGGTCCTTCCTGGTCAAGAAGGTCAAACTTGACG	GeneID:83482	NM_031309.3	145530751	151	0.14983	3.91043e-05	0.0554275	0.00307221	0.473686	0.323856	294.004	299.743
ZSCAN1	5390400	19	63236961	GGACACTGTATAAAACGGTTGCGTGTCTGGAATGCCGTCGTTTTGCCCCG	GeneID:284312	NM_182572.2	63237246	-285	0.149813	0.00252353	NA	NA	0.217908	0.0680951	NA	NA
GBGT1	1690427	9	135028511	CGCGCCTCAACTCGCTGGCTCGTTGACCTTGGGCCAGTCATCCCCTGCTC	GeneID:26301	NM_021996.3	135029122	611	0.14979	9.23753e-07	NA	NA	0.729299	0.579509	NA	NA
ICAM4	990373	19	10258780	GGGCACTGAGGTCCCGGAGGGCGCGAGAGGGCTACCCTTGGGGCTTTGCG	GeneID:3386	NM_001544.2	10258680	100	0.149784	0.0164588	-0.351969	0.123882	0.346242	0.196458	705.513	2240.02
RNASE1	2600360	14	20341153	CTGGTGCCCAAACCTGGCACACTAGGAACAAAGTCCTTGTTACTTCTTCG	GeneID:6035	NM_198232.1	20340876	-277	0.149406	0.00147193	-0.111332	0.0123947	0.619225	0.46982	301.924	293.896
SLC18A3	4220706	10	50488305	TAGCATGAGCGACGTAAGTGGCCCGGGCACCACTCGGGGGCTGGGACTCG	GeneID:6572	NM_003055.1	50488353	-48	0.149208	0.000904786	-0.163218	0.0266401	0.238276	0.0890679	392.157	327.71
ACTA1	6860564	1	227636231	CGCGCTTTAAAAAGGAGGCAAGACAGTCAGCCTCTGGAAATTAGACTTCT	GeneID:58	NM_001100.3	227636466	235	0.14919	0.00635552	0.00813815	6.62296e-05	0.313945	0.164755	418.914	395.434
PIGZ	6040091	3	198179253	TTCTGTAATGAGGACATTTCTCATCATTCCTTCTTCTCAAAAGTCATTCG	GeneID:80235	NM_025163.2	198180101	848	0.148996	4.66342e-05	NA	NA	0.591577	0.442581	NA	NA
DMN	2480246	15	97463186	GCTGGACGAGCTGAGCTGGGCCACTGCGCTGGCGGAGGGCGAGCGGGACG	GeneID:23336	NM_145728.1	97462809	377	0.148899	0.00859719	-0.20793	0.0432348	0.293457	0.144558	1398.68	3113.52
BLZF1	1070129	1	167602397	CGCACAGGAAAGAAAAAAACAACTGGAAGCGAAATGTAACAGATGGAAGC	GeneID:8548	NM_003666.2	167603818	-1421	0.148812	6.94968e-17	NA	NA	0.873082	0.72427	NA	NA
TNS1	6130739	2	218516897	CGCCCCTGTCCTGGGAGTCCCTTGGCCCAGACACCCACCTGACTTAGTGG	GeneID:7145	NM_022648.3	218517006	109	0.148475	0.000624097	NA	NA	0.451053	0.302578	NA	NA
NPR2	4070167	9	35781475	CGCCAGGTCCCAAACCCACCCCGGTGAGCACTTGGGGGCTCCGCACCAAG	GeneID:4882	NM_000907.2	35782406	-931	0.148278	0.0040458	-0.0828706	0.00686754	0.582877	0.434599	639.788	655.272
LGALS12	7560064	11	63029130	GGCAGCAGGGAATTCCTGGACCAGGACCAGGCTGGGCAAAGGCTCAAGCG	GeneID:85329	NM_033101.2	63030132	-1002	0.148252	1.51907e-06	-0.222223	0.0493832	0.50062	0.352368	353.356	363.841
VIPR2	4480372	7	158629868	CGAGCTCATCGTTGACGCGTCCAGGAAGAAACGATCCCGTTTCCAGCAAA	GeneID:7434	NM_003382.3	158630410	542	0.147856	0.00111628	-0.154676	0.0239248	0.188021	0.0401649	299.852	307.009
GPR124	540368	8	37774427	TTCACCTGTGCAGGTGAGTGGGCGCCTGCGGTGCCTTTCTCTGGGGTGCG	GeneID:25960	NM_032777.6	37773932	495	0.147773	0.00340059	-0.029215	0.000853518	0.265608	0.117835	743.026	752.729
ZNF677	4890176	19	58450421	CCTACGCAGACAACTCCAGCTTTCGCTTAATTAAATACAAATTTTAATCG	GeneID:342926	NM_182609.1	58449923	-498	0.147294	0.0018774	NA	NA	0.382347	0.235052	NA	NA
DLX5	4210674	7	96489522	CGGCCAGCTGAAAGCTGGAATAAATAGTCCTGGGTTTACGAACTTTCTTT	GeneID:1749	NT_007933.14	NA	NA	0.14721	0.000423144	0.0277135	0.000768039	0.437657	0.290448	357.171	319.708
FLJ39822	1030390	2	165520228	CCAAGATCTCTAGGCTGTGGCAGCCTGGGGCGCTTTTCCACCGGAGTTCG	GeneID:151258	NM_173512.1	165520281	53	0.147203	0.00021806	-0.0401307	0.00161048	0.496765	0.349563	697.972	386.927
HDC	1690343	15	48345343	TTAGAAGCGCCTTTTATCCTGGCTCTCTTGACCAGTCAAAGTTGTGGTCG	GeneID:3067	NM_002112.1	48345214	-129	0.147145	3.49892e-05	-0.145219	0.0210884	0.528147	0.381001	417.291	512.623
CLIPR-59	7200167	19	41215245	GCCCTCTATGGGTAACGGGGGTCCCTATGGTTGCCCAAGATCCAGTTGCG	GeneID:25999	NM_015526.1	41215615	370	0.147108	0.000526825	-0.334311	0.111764	0.491075	0.343967	1832.44	1311.82
WT1	3940209	11	32407167	ATTAATGAAAGTTGGTGCGCGGGCCCCTGATTTACAGCTCGGAGTCAACG	GeneID:7490	NT_009237.17	NA	NA	0.147028	0.00412989	0.150085	0.0225256	0.279352	0.132324	475.888	377.119
CSPG5	3520554	3	47596131	CGTCGTCCCCCAGGTGTCTCAGACCACCAAAACTCAGGTTCCTGGGTAGA	GeneID:10675	NM_006574.2	47595193	-938	0.146956	3.42005e-05	0.0866517	0.00750852	0.540303	0.393347	373.116	352.315
SRCAP	1500327	16	30625944	CGGCTGAATTCCTGAGCACTAAGTGGGCTGAGTGTGTTATGCTTATGTTT	GeneID:10847	NM_006662.1	30626080	-136	0.146868	3.2523e-08	-0.18322	0.0335697	0.651176	0.504308	410.659	385.354
ADRA2B	1070431	2	96145618	CTATGGCCGCTGTGGCCTGCACGGAGTAGGGGTCCTGGTGGTCCATGACG	GeneID:151	NM_000682.4	96145615	-3	0.14681	0.000264314	-0.0221332	0.000489879	0.456107	0.309296	403.152	346.132
PCDHGB4	6520500	5	140747384	CGGCGCCCAGAGTCAGCACTAGGAAACTACAGCCTCTGCTGCTTCAAGTT	GeneID:8641	NM_003736.2	140747636	-252	0.146807	0.00453169	-0.125423	0.015731	0.216914	0.0701068	348.388	340.903
TM6SF1	840162	15	81567450	CGGCCACCGGGGTCTTCGTGCTGTCCCTCTCGGCCATCCCGGTCACCTAT	GeneID:53346	NM_023003.1	81567384	66	0.146343	0.00563247	-0.205948	0.0424145	0.251553	0.105211	639.563	1451.99
CPNE9	2570731	3	9720369	GCATCATGGACAACTCTAGGGGGCTTGGGTTTCCACCCCAGAGACTTGCG	GeneID:151835	NM_001033755.1	9720510	-141	0.146263	2.0342e-09	NA	NA	0.709933	0.56367	NA	NA
ALX4	2600537	11	44281605	GTTCGGATTTGGACTCCAGAGGCAGTTGGAAGGGTCACCGTGGCGCTCCG	GeneID:60529	NT_009237.17	NA	NA	0.1461	0.00241515	-0.0320723	0.00102863	0.316542	0.170443	336.039	325.337
GPR6	6280538	6	110407266	AGCGGTGAATCCGTGGGACGTGCTCCTGTGCGTGTCGGGGACAGTGATCG	GeneID:2830	NM_005284.2	110406987	279	0.145973	9.78203e-05	0.217717	0.0474007	0.330242	0.184269	325.981	296.282
NEUROG1	6020273	5	134899557	CGACTGGCCTCAGGACCCCTTAAGTACCCGGCGCAACAATGGGCGCCCCC	GeneID:4762	NM_006161.2	134899538	-19	0.145569	0.00420105	-0.174062	0.0302975	0.256628	0.11106	336.854	326.285
TRPC5	3060195	X	111212151	CGCAGCCAGTCACACACAATAAGAGCTAGGGAAGAAACTGACACGGGGAA	GeneID:7224	NM_012471.1	111212660	509	0.145475	0.0117625	0.316505	0.100175	0.384436	0.23896	421.555	406.876
UNQ9433	6860047	8	53641007	TGACGGCGTGGCCAGTGTTCCTGAGCGAGCAGGGGCTCGGCAGCAGAGCG	GeneID:389658	NM_207413.1	53640574	-433	0.145456	0.00232507	NA	NA	0.292995	0.147538	NA	NA
VAMP8	4570551	2	85657082	CGCAGAGGTAATTGATCCCAGTCAGTGATCAGAGGACTGCCCCAGTGAAC	GeneID:8673	NM_003761.2	85658228	-1146	0.14542	5.67615e-07	NA	NA	0.761367	0.615947	NA	NA
EPAS1	5090026	2	46376965	CGCCCTTAGTTTTTGAAGGCTGTGGAAGGACCCATGAGTTTCACAGGTGT	GeneID:2034	NM_001430.3	46378067	-1102	0.145394	4.52234e-06	-0.213913	0.0457587	0.5374	0.392006	340.743	411.083
DLX5	5910070	7	96488445	CGGCCTACCGCCAAGAAGCTATGCCTTAGGCAAACCATGGAGCTCTGGCC	GeneID:1749	NT_007933.14	NA	NA	0.145373	1.07553e-05	0.139958	0.0195882	0.595968	0.450596	357.171	319.708
PENK	4560674	8	57521059	AGGAGCCCGGGGCCGAGCAACAGCAGCCAAGTGCAAAGTGTCAGGAACCG	GeneID:5179	NM_006211.2	57521143	84	0.145328	0.000337313	-0.182792	0.0334131	0.39418	0.248852	932.374	454.906
SH3PX3	3060438	15	73728631	CGGCTGTTCTGGCCCTGCAGCCAGCCATCCAGTGAGGTCTCGCTAAAGAT	GeneID:257364	NM_153271.1	73728403	228	0.145247	4.48993e-05	NA	NA	0.562253	0.417006	NA	NA
BCAN	770220	1	154878764	CGCCCCCCGCCTGTCAGCCCTTGCCTCGAGGCTCTGGGGCACCCAACTCG	GeneID:63827	NM_198427.1	154878364	400	0.145192	0.0301186	-0.00563452	3.17479e-05	0.303712	0.15852	311.128	307.486
FLJ27365	5050296	22	44860687	GTCTCCACAGGTGCAGGCATTGGGCAACTTACTATCTCAAGCTGAAGGCG	GeneID:400931	NM_207477.1	44860547	140	0.1451	5.33769e-05	NA	NA	0.5335	0.3884	NA	NA
ANGPTL2	6380437	9	128925551	TACTAGTAATCTACCTGCAACAGCTGCAGCGAGGACTCTGTGAGGTCACG	GeneID:23452	NM_012098.2	128924865	-686	0.144833	7.0268e-05	-0.214771	0.0461265	0.442028	0.297195	3186.53	1531.94
GDF3	450154	12	7739360	CGCCCAGCTCCTTTACGTAGCATAAGTCTCGGGAGACCCCAGTGGTCGCT	GeneID:9573	NM_020634.1	7739627	267	0.144794	0.0125932	0.00990582	9.81253e-05	0.369787	0.224993	347.037	350.392
HOXA4	1190687	7	27136838	TCACAAATTAATGACCATGAGCTCGTTTTTGATAAACTCCAACTACATCG	GeneID:3201	NM_002141.2	27136924	86	0.144664	0.00187926	-0.410525	0.168531	0.512686	0.368023	512.969	623.404
KIF12	2470286	9	115901263	GCCGCTAGGTGCAGGTATGATAAGTCGCATTGCTGCCCACAGGGATCTCG	GeneID:113220	NM_138424.1	115901158	-105	0.144377	1.26055e-05	-0.291631	0.0850489	0.584963	0.440586	309.934	313.537
TAC1	4670338	7	97199695	CGCCTAACCGGTACAGGTGAGACTTCAGTCCTTATGTTTTTGATCTTGGT	GeneID:6863	NM_003182.1	97199311	384	0.144015	0.00120798	-0.147498	0.0217556	0.341041	0.197025	327.828	331.567
INPP5B	2640070	1	38185275	CGGGACTCCGCTGCCCCAGGTTCCGGGACAGTGACTACATTTCCCAACAG	GeneID:3633	NM_005540.1	38185280	5	0.143921	0.0200791	-0.0527571	0.00278332	0.294777	0.150855	329.497	324.243
HPSE2	6480605	10	100986060	ACCATGCCGTTGTACCGTCTGGGTACAGAGCAAAGGGTCTCGTTTTTACG	GeneID:60495	NM_021828.2	100985609	-451	0.143908	0.00271278	-0.0988178	0.00976496	0.235398	0.0914894	330.205	347.716
NRIP2	2650646	12	2814741	CGCTGGGAGGTGCACTAAGGCTGCTGCCCCCACACAGTGACAAGCGCTTC	GeneID:83714	NM_031474.1	2814450	-291	0.143899	0.00273022	-0.0614212	0.00377256	0.363988	0.220089	334.695	349.557
CART	610592	5	71051188	GGATGAGGGATTCGCTCAACAGACTGCCAGGAGCCCGTGAGCTCGAGACG	GeneID:9607	NM_004291.2	71050750	438	0.143641	0.0071451	0.0480214	0.00230605	0.223057	0.0794157	370.133	355.679
SALL4	1710537	20	49852366	TGATGTGCTGGGGTTTCGCCTGCTTGCGCCTCGACATGGTGCGAGCATCG	GeneID:57167	NM_020436.2	49852421	55	0.143615	4.01001e-07	0.191629	0.0367215	0.798787	0.655172	617.737	358.955
TMEM88	2490689	17	7699016	CGGCTCTAGGATTAGGCACCCCCCATCCCGAGGAGCGGACCAGAGCCCTG	GeneID:92162	NM_203411.1	7699109	-93	0.143544	1.1851e-06	NA	NA	0.770112	0.626568	NA	NA
FLJ37478	4150292	4	2030017	TGTCGGGGAAGCTCTGCTCCGGCAGCCCTCGGGGTGGTGCTGGGAGGTCG	GeneID:339983	NM_178557.2	2031385	-1368	0.143519	0.000948665	0.0574839	0.0033044	0.243917	0.100398	351.339	334.975
AXUD1	2100482	3	39170908	CGACATGCCCCGGCAACCAAGTCCTGGCCTGGGAGCCCACCCTCAGCCCC	GeneID:64651	NM_033027.2	39170105	-803	0.143395	2.41125e-05	-0.1996	0.0398403	0.729271	0.585876	5449.33	13367
FBXO39	1690309	17	6620257	CGCCTTGCTCTGGCCCAAGCTAAATGCCAAGCTCCGGCCGCCTTTGTGAC	GeneID:162517	NM_153230.1	6620296	-39	0.143314	0.0027324	NA	NA	0.397152	0.253838	NA	NA
SYCP1	1580131	1	115199120	GGAGCCATTGGTTCTTTCTGTTGCCCTCATAGACCGTATGTAGCAGTTCG	GeneID:6847	NM_003176.2	115198978	142	0.143251	6.65103e-06	0.134292	0.0180343	0.58095	0.437699	318.418	326.263
HOXA9	2230132	7	27172004	CCCATACACACACTTCTTAAGCGGACTATTTTATATCACAATTAATCACG	GeneID:3205	NM_152739.2	27171674	-330	0.143025	0.00302694	-0.0464816	0.00216054	0.36102	0.217995	316.591	307.816
OLIG2	5890670	21	33319654	GATGGTTTGGAGACTCTGCAGAGTCTAACAAACTAACCTGATGCCCCACG	GeneID:10215	NM_005806.2	33320109	-455	0.14292	0.000973865	-0.0196724	0.000387002	0.289727	0.146806	274.72	273.632
GBX2	2230161	2	236741236	CGTCTACACCGGCTACCCCATGTTCATGCCCTACCGGCCGGTAGTGCTGC	GeneID:2637	NM_001485.2	236741391	155	0.142726	0.00515616	0.132603	0.0175834	0.305871	0.163145	361.576	358.514
ADAMTS18	3060193	16	76026394	TGGGCCGGGACTGGAGCGCAAACGGTTGGGAGACTGTCGGTGTCTGCCCG	GeneID:170692	NM_139054.2	76026512	118	0.142423	0.000590572	0.0187648	0.000352116	0.216336	0.0739131	345.16	335.352
SIX6	110253	14	60045590	AGCTTTGATTGGCAGAGCCACCCGGTGACTGACAGGGGGTCTCCATGGCG	GeneID:4990	NM_007374.1	60045775	-185	0.142357	0.00347951	0.0216843	0.000470207	0.214758	0.0724011	315.288	305.041
RIPK1	4810170	6	3021353	CGGAGTTTTGGTATGCATTTCAATGAATGTTTGTATTATGTTGTCCAACA	GeneID:8737	NM_003804.3	3022057	-704	0.142156	0.000165607	NA	NA	0.532752	0.390596	NA	NA
PLA2G3	3310500	22	29865981	CGCTCGGCATGCCTCCCACTGACTCTGAAGAGTGGCCAGTGCTCTCTGCA	GeneID:50487	NM_015715.2	29866469	488	0.142135	4.91527e-06	-0.421288	0.177484	0.688851	0.546716	331.725	400.553
SLC38A4	5490228	12	45506108	CGGCCTGCAGGAGTACCAACATTGCAGACAGAACAGCGACCTATCCCGCC	GeneID:55089	NM_018018.2	45506006	-102	0.141725	0.00849849	-0.00503115	2.53124e-05	0.353625	0.2119	354.402	315.779
SST	2370239	3	188870919	CGTCAGGCTAGGAGGCGCCCCCAGATCTCACCAGCCCTTTTACGCACCAT	GeneID:6750	NM_001048.3	188870895	-24	0.141675	0.0128779	0.372986	0.139118	0.271776	0.130101	716.622	341.129
MT1E	7330767	16	55216837	GCAGCAGGTGGGCTGCACACGGACTCTGGGACAAGTCGAGCTGAAAACCG	GeneID:4493	NM_175617.2	55217219	-382	0.141597	0.0257738	-0.29182	0.0851586	0.173879	0.0322827	425.032	756.597
SLC22A18	4120338	11	2887061	GACCCCGGGCAGGGCCGGGCTGGAGGCGGCCGCCAGGAGCAGGTAGAGCG	GeneID:5002	NT_009237.17	NA	NA	0.141521	1.10021e-09	NA	NA	0.736949	0.595428	NA	NA
RIN2	4220014	20	19817644	CGGAAGAGGACAACATGTAAACAGCTTCACGATCATCCACAAAAGGGGAG	GeneID:54453	NM_018993.2	19818210	-566	0.141483	6.22639e-05	NA	NA	0.590027	0.448544	NA	NA
PDE10A	2230563	6	165995510	GCTCGCATTATTAGAAGGTCCATCTTCCATGTCGGAGCCGAAGAGCAGCG	GeneID:10846	NM_006661.1	165995574	64	0.14133	0.000720516	0.224055	0.0502006	0.332686	0.191356	302.927	295.911
ZNF625	270433	19	12128464	CGCCATAGCTTCTGTCGCTCCATCGCCCGCACTGTGACTGGACTGTTAGA	GeneID:90589	NM_145233.2	12128529	65	0.141265	0.0496539	NA	NA	0.214388	0.0731221	NA	NA
HKR1	1070370	19	42517519	AGGGACACGCAGAGGGGCATGCTGACTGCCTATAGGGCACTCACGGAACG	GeneID:284459	NM_181786.2	42517420	99	0.141226	0.0123715	NA	NA	0.45371	0.312484	NA	NA
RRP22	3830187	22	28042045	CGCTGGGTCTGCGCTCCGCATCCATCACAGGCAGACTCCTCAAGAGGCTC	GeneID:10633	NM_006477.3	28041748	-297	0.141137	3.41564e-07	NA	NA	0.720382	0.579245	NA	NA
UTF1	7550465	10	134893498	CGGCACCTCCGTTGAACGGGTCTAAGAACAGAACTCCTGAGGACCCTCCG	GeneID:8433	NM_003577.2	134893768	-270	0.141064	0.00157204	0.227582	0.0517935	0.346324	0.20526	366.983	366.19
MMRN2	4010674	10	88706639	TCCAGTTGCAAGACCATCCTGCCCACTTGCTGGGTCGCTGAGGCAGAGCG	GeneID:79812	NM_024756.1	88707352	713	0.140887	3.17005e-06	NA	NA	0.707805	0.566917	NA	NA
KIF12	2470528	9	115901109	GGAAGACATCAGGATGTACCATCTGCCCTTCTGTCGGACCCCAGGGTACG	GeneID:113220	NM_138424.1	115901158	49	0.14074	2.59952e-05	-0.163275	0.0266589	0.609941	0.469201	309.934	313.537
LRAT	3930113	4	155883139	CGCCTGAGGGTACTCTGCGGATGATGGATGAAGGAACATTCATTTTACCT	GeneID:9227	NM_004744.3	155884613	-1474	0.14052	0.00256062	0.252218	0.0636141	0.262929	0.122409	316.776	306.554
HLA-G	3420634	6	29903994	CGGAACACCAAGGCCCACGCACAGACTGACAGAATGAACCTGCAGACCCT	GeneID:3135	NM_002127.3	29903497	497	0.140477	0.00477657	-0.169827	0.0288411	0.205855	0.0653779	601.291	526.451
KLB	5260612	4	39085060	CGGGGGATTGCAAAGATCTGTCATCCTGTCAGCACTTATTCTGCTACGAG	GeneID:152831	NM_175737.2	39084868	192	0.140432	0.00011844	NA	NA	0.541872	0.40144	NA	NA
HOXB4	3940291	17	44010386	CGCCGGGGCCCTCCTCCCGGAGCCCGGCCAGCGCTGCGAGGCGGTCAGCA	GeneID:3214	NM_024015.3	44010742	356	0.140397	0.0305003	-0.215234	0.0463258	0.26067	0.120273	708.607	519.243
FLJ45983	2680670	10	8134685	CGGTGAATGTTAGACAGCAACTAAATAATTAAAAGGTTTAGAGAGCGCTG	GeneID:399717	NM_207423.1	8135453	768	0.140389	0.00233348	NA	NA	0.421701	0.281312	NA	NA
EFCBP2	3450241	16	82560100	CGGGAGCCCCCAGCCCCGCCACGTCCAGGCCGGTCTCCAGCCCAGTCCTC	GeneID:54550	NM_019065.2	82559738	362	0.140343	0.0381913	NA	NA	0.198269	0.0579255	NA	NA
GALR1	2000133	18	73090715	AAGTCACGGTGCGCGAGCAGAGACTGGACGGATTCTAGCGGGATGGGTCG	GeneID:2587	NM_001480.2	73090721	-6	0.140334	0.00157204	-0.078091	0.0060982	0.191738	0.0514039	316.911	326.483
SCRL	1850615	19	55358191	GGATGAGGGCGGAGCGCAGGTGACCCAGGGCCTCCAGCACCAAGGGGTCG	GeneID:126123	NM_152358.2	55358350	159	0.140275	0.00340155	NA	NA	0.374733	0.234458	NA	NA
HOXB6	4920767	17	44038408	CGGGGTTATTTCAGGGGACCTGAAAAACCTGGGCTGAATTTTTATTTTAT	GeneID:3216	NM_018952.3	44037333	-1075	0.140185	0.00362136	-0.38992	0.152038	0.566529	0.426343	941.498	568.503
SLC18A3	7570327	10	50488917	GGGCACTATGGGCACGATGACCATGTACAGCATGTTGTCCAGTAACAGCG	GeneID:6572	NM_003055.1	50488353	564	0.140022	0.000209931	-0.213847	0.0457306	0.349719	0.209697	392.157	327.71
TNFSF18	6400608	1	171286343	AGCATTTTCTGATACCTTTTATCTCAAAACCTTTAGATAAACTTCAAACG	GeneID:8995	NM_005092.2	171286679	336	0.139965	0.00191116	0.0702719	0.00493815	0.600091	0.460126	332.889	337.633
ST6GAL1	1500133	3	188130644	AAGAGCAACACGAGTCTTCGGAGAGGTTAAGCGACTTCCTCAGGGTCTCG	GeneID:6480	NM_173216.1	188131210	-566	0.139912	0.015185	NA	NA	0.337224	0.197312	NA	NA
RIMS4	6400739	20	42872279	TGCGTCCTCGTCGTCGAAGGAGTTCATGCACGGGAAGTAGATGGCGAGCG	GeneID:140730	NM_182970.2	42872326	47	0.139834	0.018204	-8.39542e-05	7.0483e-09	0.179921	0.0400866	377.492	365.562
KIAA1944	5870392	12	128955091	CGCAGTGAGGAAGTCTCTGACACGCCACACTGAGGTCATGCTGGCCCCAA	GeneID:121256	NM_133448.1	128954166	-925	0.139609	0.000267518	-0.0493554	0.00243595	0.328495	0.188886	403.338	373.201
HOXD8	3060703	2	176702087	CGCCCAGGGCTGACGTCTATCAAGGGTGAAATGATGGAAACTATATTCAT	GeneID:3234	NM_019558.2	176702723	-636	0.139188	0.00306764	0.071975	0.0051804	0.251059	0.111871	806.452	493.421
SLC2A3	4070286	12	7980085	CGGAGATTATAAATAGTCATGATCCCAGCGAGACCCAGAGATGCTGTAAT	GeneID:6515	NM_006931.1	7980138	53	0.1391	0.00934656	NA	NA	0.215125	0.0760246	NA	NA
KCTD12	2940661	13	76359427	GACTCACAACAGTTGCAGATCTAACGTAATTTTTAAAGCCACCTTTGGCG	GeneID:115207	NM_138444.2	76358526	-901	0.138919	2.94717e-06	NA	NA	0.161474	0.0224327	NA	NA
TNFSF12-TNFSF13	5090386	17	7394101	CGGGGCCTGTCAGGAGAGCCACCAGCCAGCAATAGACACAGAAGTCAGGG	GeneID:407977	NM_172089.2	7393140	961	0.138869	6.97945e-06	NA	NA	0.555702	0.416783	NA	NA
SCARF2	3360139	22	19122535	CGGTGGGGTGCTGTGGAGTTGGCTTTCGGCCTCGACCTGGGCTGTCTGCG	GeneID:91179	NM_182895.1	19122146	-389	0.138787	0.00547252	-0.0741259	0.00549465	0.519441	0.380572	617.31	602.363
PKDREJ	5090546	22	45037624	GGCAGGCGTTGGGCGCTGAGCAGGACGCGCAAGTCGAGGCAGTACCAGCG	GeneID:10343	NM_006071.1	45037883	259	0.138736	0.00613743	0.126677	0.0160471	0.239649	0.100861	363.7	343.788
AMT	4250048	3	49434859	CGGGCCACCACACTTACAGCCCTCTGCATCGTCGCCTGCAACGAGTGCAG	GeneID:275	NM_000481.2	49435016	157	0.138701	0.00105246	-0.42543	0.180991	0.502142	0.363405	672.057	938.266
HOXB2	3450064	17	43977036	TTCAGAGACCCAGGAGCCAAAAGCGAGCCGAAGATGGGCCTGCTCTGCCG	GeneID:3212	NM_002145.2	43977391	355	0.138618	0.000790296	-0.261687	0.0684802	0.634584	0.495884	1529.74	758.433
ALDH1A2	7400703	15	56145166	ATCTCTATCTTGCTGGAAGTCATGGTGGCGGGCCGGGTGTCCCTAGCCCG	GeneID:8854	NM_003888.2	56145198	32	0.138548	0.000222505	-0.284527	0.0809558	0.480079	0.341461	918.199	1996.7
HNT	730040	11	131286156	ACTTACAAAGTGTTGGATGTCCCCCGTTCGAACTGAGGGACTGCAGACCG	GeneID:50863	NM_016522.2	131285922	234	0.138519	0.000245245	-0.0541127	0.00292818	0.33595	0.197402	606.913	689.119
GSCL	50192	22	17517371	TGGCGTGGCCGCTGAGGCTGGGACCGGCGGTGCCCTTGTCTCTGGGTGCG	GeneID:2928	NM_005315.1	17517796	425	0.138484	0.00208937	0.0400532	0.00160426	0.329892	0.191373	299.196	296.123
GBX2	20451	2	236742443	TTTTTCATGACATTCTTAATCATCGCACCTATTTACACACTTTGCCAGCG	GeneID:2637	NM_001485.2	236741391	-1052	0.138335	0.000199214	0.224706	0.0504929	0.20941	0.0709268	361.576	358.514
FGF4	1450356	11	69299271	AGCCGGGCGGAAAGCGCGCGGCTGGAGCTGGGACTCTGAGGAGCAGTGCG	GeneID:2249	NM_002007.1	69299352	81	0.138183	0.00489605	-0.0822707	0.00676847	0.351266	0.21293	304.225	323.227
MDFI	4880324	6	41714619	CGGAGAGGAGAACTAATAACTGGCCCCTTCAGCCGCCCACCCGCCCCTGT	GeneID:4188	NM_005586.2	41714231	388	0.138082	0.0228777	-0.0692361	0.00479364	0.29614	0.157823	498.28	358.77
ZNF606	6200195	19	63206506	CGCTGGTAACCCATGCTCCCATAAAGCCTGGCCTCTGGAAAGAGACTTGG	GeneID:80095	NM_025027.3	63206526	20	0.137912	0.00768468	NA	NA	0.337424	0.19924	NA	NA
P8	4830553	16	28458120	CGGCCACACAGCTAACCCCGGCACCCCAATTCTCGCTGAGATGCAGGACG	GeneID:26471	NM_012385.1	28457831	-289	0.137849	0.00798917	-0.192574	0.0370846	0.285617	0.147535	2523.51	3594.28
CDKN2A	520523	9	21958233	TGATCTAAGTTTCCCGAGGTTTCTCAGAGCCTCTCTGGTTCTTTCAATCG	GeneID:1029	NT_008413.17	NA	NA	0.137829	0.0164975	0.218596	0.0477843	0.284792	0.146881	318.905	313.448
WT1	3930382	11	32407268	TGGGTGTCATGGTGTCAGGTCGGGTAGCCCCAGACAGATAACATTACTCG	GeneID:7490	NT_009237.17	NA	NA	0.137821	0.013405	0.214956	0.0462061	0.512136	0.374287	475.888	377.119
KCNA6	6370193	12	4788652	AGCTTACTGGTGAGGCAAGTGTGCGTCTATTTCCATGGCGCCCTGGCTCG	GeneID:3742	NM_002235.2	4788603	49	0.137794	0.0323714	-0.287014	0.082377	0.275628	0.137799	345.65	346.156
OLFML2A	130286	9	126602682	CGGCCATTTGTGTCTGCAACTGGGACTGCCTAGATGCCGATAAAGCAGCT	GeneID:169611	NM_182487.1	126602974	-292	0.137757	2.29343e-05	NA	NA	0.393594	0.255773	NA	NA
EFEMP2	6650504	11	65396445	AGCATCCTGGGGCTGCGAGATGGTGGACACGGGTCAGGGGCCTCTGCCCG	GeneID:30008	NM_016938.1	65396789	344	0.1376	1.48167e-08	-0.372307	0.138613	0.273921	0.136127	2703.28	3066.4
EPOR	6590327	19	11356295	AGCCTGGCACATAGCGAACATTCCAAAAAATGTACCTACTGATTTTATCG	GeneID:2057	NM_000121.2	11356019	-276	0.137348	1.00899e-06	-0.649207	0.42147	0.607236	0.469478	525.789	797.254
TOB1	4070367	17	46296038	CGTGGATGATAATAATGAAAATGGATGTGAGTTGGATAAGGAGATCAAAA	GeneID:10140	NM_005749.2	46296412	374	0.137331	3.51421e-06	NA	NA	0.603736	0.466136	NA	NA
HIST1H3J	4200601	6	27966616	CGATGATCTGATCCTGATTGGTCAGAACTGTTGTAGGAAAAACCTGGTTG	GeneID:8356	NM_003535.2	27966549	-67	0.137199	0.0157965	-0.145413	0.0211451	0.312247	0.174649	347.318	323.834
PLEKHB1	6060600	11	73034807	AACTCAATGGTTAATAGGATTGGCCATGGCGAATCCCTCAGCAGGGCACG	GeneID:58473	NM_021200.1	73034871	-64	0.137115	2.71299e-09	-0.08329	0.00693722	0.617998	0.48065	684.063	806.287
IRX4	1740487	5	1935871	TAGAAAAGTTTGCGGAGCGCGGGGATGGACTAACCGGCTCTCCTGCTTCG	GeneID:50805	NM_016358.1	1935880	9	0.137015	0.0056771	0.0452085	0.00204381	0.762339	0.625008	688.799	304.505
AGER	4480086	6	32259572	CGGGGATCCAAATCATTGCTGGTCTCCCTGGAAGTTGGGAGGCTGCAACA	GeneID:177	NM_001136.3	32260001	429	0.137009	6.16147e-13	-0.779279	0.607276	0.170747	0.0335474	556.829	3695.95
FLJ42486	7000725	14	104142427	CGGGCCTCACACAGGCCGACTCTGGGTCGTCAGTTCCTCATCAGCTCGAA	GeneID:388021	NM_207379.1	104142142	-285	0.136941	0.00154103	NA	NA	0.779264	0.642149	NA	NA
COLEC10	380717	8	120148806	TCTTTTGCAAATTCAGAGTCTGGGTCTGGATATTGATAGCCGTCCTACCG	GeneID:10584	NM_006438.2	120148627	179	0.136924	9.59421e-11	-0.106359	0.0113122	0.326099	0.189084	316.505	331.509
LRMP	150519	12	25096735	TTGCCTCTTTCTGCAGAGTCGCCTCTTTCATCAGCAGGCTGTTGATACCG	GeneID:4033	NM_006152.2	25096508	227	0.136869	0.0225109	0.334504	0.111893	0.830205	0.693196	1594.88	923.937
LRP5	3440112	11	67835657	TGTTCCTCCAGATTTGTGACAGCTTTGCCAGGCTGGAGTCAGGCTGAACG	GeneID:4041	NM_002335.1	67836711	-1054	0.136755	9.18925e-08	0.283938	0.0806206	0.423655	0.286714	1901.76	1514.37
PSEN2	5550148	1	225125732	CAGATCTAGAAGCCAGGACACTGGGGTCGAAGCCTGGCTCTGCTATATCG	GeneID:5664	NM_000447.1	225125586	146	0.136594	0.000444767	-0.214689	0.0460915	0.795522	0.658598	1226.22	1240.4
HOXA13	1510181	7	27205549	GGTAAGGCCCGGCTGCGTAGCCCTGGTGGTAGAAGGCGAACTCCTTAGCG	GeneID:3209	NM_000522.2	27206221	672	0.136572	0.0126124	-0.181687	0.03301	0.250431	0.113562	330.983	293.405
HOXA7	3290450	7	27163315	TGGCTCCAGTTTGCGGTGGCAATCTCTCTGCAGCTGCAAGAGATGCTGCG	GeneID:3204	NM_006896.2	27162821	-494	0.136548	0.00235825	0.1411	0.0199091	0.72685	0.590096	713.844	535.815
OPRM1	1230195	6	154402044	CGCAAAGCGATCCAAGGAGTAGGTCTCTTCACTGGGCACTCTTCTGTGCA	GeneID:4988	NM_000914.2	154402136	-92	0.136417	0.00498392	-0.313334	0.0981783	0.665596	0.529002	355.379	352.056
C7	130630	5	40945289	CGGTTGGGGTAGGAGCTAAATCTCAGGACCACTTGCTCTATATATGAGTG	GeneID:730	NM_000587.2	40945356	-67	0.13637	0.00113146	-0.375045	0.140659	0.273606	0.137034	4568.6	12348.9
BRSK2	6480402	11	1368185	CGCACCTGTCTGCCCCTTGCCCAGCGTCTTCTCCAGCCGGTAGGGCCCAA	GeneID:9024	NM_003957.1	1367705	480	0.136318	0.00295477	NA	NA	0.465343	0.328796	NA	NA
GUCY2D	6040601	17	7846823	CGCCCTCAGACCGACCCTATCCCAGCGGAGGGGCCTCTGACATTTACAGG	GeneID:3000	NM_000180.1	7846713	110	0.136221	0.0145122	0.296945	0.088176	0.26333	0.126913	500.194	574.774
SH3GL3	2490079	15	81907111	CGCCGATGGCAACACTGCGTTCCAAAGCCCCTGCGCAGCCCATTGGCCAA	GeneID:6457	NM_003027.2	81907287	-176	0.136211	0.012306	-0.311869	0.0972624	0.411518	0.275148	613.329	1223.15
LRFN5	4920072	14	41147424	CGACTGTGAAAGCCACCTGGAGCCACCTTGCCGGGATTGTACCTGCAGGC	GeneID:145581	NM_152447.2	41147090	334	0.136153	0.00771543	NA	NA	0.225137	0.0888188	NA	NA
RNASE8	7560372	14	20596191	CGGGCCCATGTCCCTGACCATGGGTGAGCTCACCTCAGGGAAGTACCCAA	GeneID:122665	NM_138331.1	20595892	299	-0.136044	4.35289e-05	-0.0659167	0.00434501	0.226596	0.0903745	283.99	270.349
MAGEA6	7160671	X	151617883	GTTGCCAGGATGTGACGCCACTGACTTGCGCATTGGAGGTCAGAAGACCG	GeneID:4105	NM_005363.2	151617901	-18	-0.136064	5.84211e-05	-0.602384	0.362867	0.736493	0.872557	1116.14	346.427
SFN	4290162	1	27061885	CGGCTTTAGCCCCTGGCTGCTTCAGCCTCGACAGAGCCCATAAAGGTTCA	GeneID:2810	NM_006142.3	27062220	-335	-0.136086	3.52291e-06	0.0166398	0.000276883	0.247066	0.110913	5881.58	1839.14
LACRT	4250603	12	53315414	CGGGCTCACTTAGTTTGGGGAAACCTTCAAACCCTGCACTGAGTCCTATG	GeneID:90070	NM_033277.1	53314930	-484	-0.136187	0.000720231	-0.262592	0.0689548	0.450359	0.586546	282.784	278.003
IL21R	5670333	16	27319997	CGTCACACAAGCCAAGAAGAATTAGAGCTGGGATTTGAACCTGGGTGTGT	GeneID:50615	NM_181078.1	27321224	-1227	-0.136266	0.000719295	-0.250313	0.0626567	0.361578	0.497843	660.453	485.631
ENTPD2	4760367	9	139068677	CGCGGCTCTCCAGCACAGGACCCTCCGAGCCAGCCTCGCCCGCCCACCCC	GeneID:954	NM_203468.1	139068326	-351	-0.136548	4.04614e-09	-0.0549252	0.00301677	0.179245	0.315793	351.781	348.443
LUC7L	7650411	16	220047	CGACCACGAGGTTGTAATCATAGAACCTAATATTAATGCCATGACTGATG	GeneID:55692	NM_201412.1	219450	-597	-0.136591	0.0332412	0.154659	0.0239195	0.626106	0.762697	1010.53	1144.56
ABCC2	650102	10	101532973	CTTATCATTATCATTTCAACATCAACATGTCTCAGCAAGACTCAGTCACG	GeneID:1244	NM_000392.1	101532561	412	-0.136747	0.000140118	-0.372719	0.138919	0.615415	0.752161	472.584	299.962
GPR55	6270598	2	231497709	CGCCCGAGATGACACACTCTCAGGGATCATCCTGCAGCCCTGAGCAAGTG	GeneID:9290	NM_005683.2	231498185	476	-0.136813	0.00293261	-0.228277	0.0521103	0.343344	0.480158	374.779	358.283
DGKA	6220519	12	54609994	TGCTCAAAGTAATGCCACCCTATGTATTACCTGTGTTTCTCACTCTATCG	GeneID:1606	NM_001345.4	54611213	-1219	-0.137006	0.000520827	-0.363322	0.132003	0.331232	0.468237	821.813	581.444
CEBPG	270017	19	38555716	GCGAGTTTTAAGTCACACTGGATCGCTGCTTATTTTCAGAGATCACCTCG	GeneID:1054	NM_001806.2	38556449	-733	-0.13719	0.000823751	NA	NA	0.437657	0.574846	NA	NA
MGAT1	3310725	5	180163632	GTTACTGACTGACTGCTCACTAACTTGTTTCTACATGAAACCACGAATCG	GeneID:4245	NM_002406.2	180162654	-978	-0.137283	0.0160107	-0.0334945	0.00112188	0.471032	0.608314	1958.15	2174.24
DPP6	3180280	7	154060477	CGAGTGTTGATATATCTGCAACAGACAAAAAGGAAAAAAGGTAGGCATTG	GeneID:1804	NM_001936.2	154060464	13	-0.137324	0.0023835	-0.287575	0.0826993	0.631122	0.768446	336.865	331.681
MARK2	3780678	11	63412666	ACAAAGCCCCGCTGGCTTCTCAAGGGCCAGAGCCTGGTGGTCAGGAAGCG	GeneID:2011	NM_017490.1	63412651	15	-0.13737	1.5039e-05	-0.224999	0.0506248	0.220248	0.357617	332.106	316.868
MS4A8B	4890253	11	60223149	CGGTAAATCTGTCATGGACTATTACATGCAGCTGTTTTTGTACTGTGCAA	GeneID:83661	NM_031457.1	60223623	-474	-0.137373	0.00206611	0.025235	0.000636804	0.534714	0.672088	499.762	829.796
JK2	1230288	2	89411504	CACAAGGGAACTCTTTTTTTTCAAGTTCTTAATCAGAGCACTGGTCATCG	GeneID:50802	ENST00000429992	89411551	47	-0.137487	8.9912e-05	NA	NA	0.41803	0.555517	NA	NA
DUSP2	7610181	2	96175180	GGGAAGGTGTTACCCGGAGTCGGAGGGACTAGCACCCCTCCGTTTTTGCG	GeneID:1844	NM_004418.2	96174906	-274	-0.137492	3.58084e-07	-0.157442	0.0247879	0.230831	0.368323	655.162	657.907
BDKRB1	7100538	14	95792059	ATCTGCAGAGGTCTGCAATCCTGCCCAAGACCTGTATGTTGGCAAACACG	GeneID:623	NM_000710.2	95792312	-253	-0.137788	0.000842778	0.0353907	0.0012525	0.394218	0.532006	509.102	395.823
BCL2	2260082	18	59136360	GTGTGTGGAGAGCGTCAACCGGGAGATGTCGCCCCTGGTGGACAACATCG	GeneID:596	NT_025028.13	NA	NA	-0.137912	0.00178679	-0.290272	0.0842577	0.274875	0.412788	1016.29	954.236
CD1E	1990110	1	156589469	CGCAAGCAAGGGGACTCCAATGCTCTCAGGCCATGAACTAATGAGGAGCT	GeneID:913	NM_030893.1	156590403	-934	-0.138065	0.000744466	0.0992187	0.00984435	0.556399	0.694464	339.429	353.628
IFNA8	1400053	9	21399505	GGACTCATCTGCTGCTTTGGATGAGACCCTTCTAGATGAATTCTACATCG	GeneID:3445	NM_002170.2	21399133	372	-0.138084	0.00072352	0.0572794	0.00328093	0.56711	0.705194	404.281	400.391
S100A10	4670400	1	150242190	TCCCAAGCAGCTGTCATCGCTGTGGTTCTACCAAGAGTAAGGCAGAGTCG	GeneID:6281	NM_002966.1	150243040	850	-0.138141	2.68932e-05	NA	NA	0.328723	0.466864	NA	NA
SAMD10	3440296	20	62082302	AGGGCCACATCCTTAGCTCCTGGAGAGCTAATTGACGAAATAAATAACCG	GeneID:140700	NM_080621.3	62081436	-866	-0.138205	6.53839e-05	NA	NA	0.300857	0.439062	NA	NA
FLJ25530	6130528	11	124312111	TGTAACAAAGGATTTGCTAGGTACTCTTCTGTACCAAATCTCCATCAACG	GeneID:220296	NM_152722.3	124311156	-955	-0.138309	0.00018133	0.113602	0.0129054	0.657181	0.79549	270.811	278.774
RNF133	5090296	7	122125815	CGTTCCAGGTACTGGCAACCAGGTGTTCCCCATGTTTCATCAGGCATTTG	GeneID:168433	NM_139175.1	122126444	629	-0.138451	7.63748e-05	-0.105597	0.0111508	0.500573	0.639024	370.85	371.356
CA1	5490424	8	86478130	AAATATGACTAAAGGCCCTTGCCATGACTGATGTATTCTCCTGGCCAACG	GeneID:759	NM_001738.1	86477594	-536	-0.138484	0.000173614	0.201708	0.0406861	0.63764	0.776124	331.886	344.417
RFFL	290543	17	30441292	CGCTGGCTAACCATCCCCTGGGCCGCCCTGCTGCTTGGCGGTTTACTAAC	GeneID:117584	NM_057178.3	30440407	-885	-0.138548	0.00931047	NA	NA	0.483973	0.622521	NA	NA
SCGB2A2	2230762	11	61794235	AGGACCATCAGCAACTTCATGGTGAGGCTGCTGCTGTCGGTGTTCAGTCG	GeneID:4250	NM_002411.1	61794206	29	-0.138558	0.00075057	-0.35343	0.124913	0.708063	0.846621	336.54	330.559
B3GALT1	6660441	2	168383286	TGAGGTTAATTTCTTCATTCTTTTTTCATTCAGTCCACCTCTATTCAACG	GeneID:8708	NM_020981.2	168383428	-142	-0.138662	0.000944774	0.0675882	0.00456817	0.57885	0.717512	274.541	280.859
POP2	3710132	3	192661768	TTTCTACCAGTTGCTTCCCATTAGCCTTGTCTACCTCTGTCTGGGGGACG	GeneID:152138	XR_000607.1	192661646	122	-0.138691	0.00218268	NA	NA	0.557675	0.696366	NA	NA
SYN3	6620709	22	31733542	GGAAAGCAAGCTCTCTGGCATCCTTTCTTATAAGGGCTGTACTTCCATCG	GeneID:8224	NM_003490.2	31732683	-859	-0.13875	0.000372213	0.13642	0.0186103	0.549625	0.688375	293.809	302.078
NALP14	110433	11	7016556	GCTTTCTCTCCTGGATAATATTTCTTCATCAAATTGGCCAGGTCCTCCCG	GeneID:338323	NM_176822.2	7016373	183	-0.138754	0.00202245	0.0306555	0.000939757	0.557075	0.695829	337.364	334.959
TMEM84	6330180	15	67160314	ACACCTGGATGCGGAATGCACAGAGCCCTTGTGTGCAGCAGCAGAAAACG	GeneID:283673	NM_173610.1	67160256	58	-0.138935	9.18925e-08	NA	NA	0.349389	0.488324	NA	NA
TNF	3930608	6	31651148	TGTGAGGGGTATCCTTGATGCTTGTGTGTCCCCAACTTTCCAAATCCCCG	GeneID:7124	NM_000594.2	31651329	-181	-0.138948	2.3724e-05	-0.0124282	0.00015446	0.412654	0.551603	438.174	626.111
GNA15	3610326	19	3087710	GCAAGGAGGCGGATCAGGCTAGGTCAGACATTGGCATCGTGGAGCCGTCG	GeneID:2769	NM_002068.1	3087230	480	-0.139032	0.000206581	-0.337116	0.113647	0.212228	0.35126	1332.38	1247.97
LAIR2	6380373	19	59705878	CGGGCAGGAGGCCCCCGGCCAGCACATCCTGTCTGCTTGTGTCTGCTGCA	GeneID:3904	NM_002288.3	59705825	53	-0.139192	1.01015e-06	0.11364	0.0129141	0.242869	0.382061	325.669	327.705
NMUR2	5820403	5	151764634	GCAATGTCCTGGTGTGCCTGGTGATTCTGCAGCACCAGGCTATGAAGACG	GeneID:56923	NM_020167.3	151765017	383	-0.139238	0.000332737	NA	NA	0.533344	0.672583	NA	NA
PRLR	2940142	5	35267029	GGGCTGCATGTTGTTCTGACTTTTCTTCTTCTTGAAACCACACACAACCG	GeneID:5618	NM_000949.2	35266334	-695	-0.139287	0.000113495	-0.0950257	0.00902988	0.459122	0.59841	410.415	345.162
SCO1	20753	17	10542757	GTTCTCTAACCCAGTAACGGAACATAGTGTTACCTGTGTTTCTTGATTCG	GeneID:6341	NM_004589.1	10541562	-1195	-0.139389	7.24481e-06	NA	NA	0.344357	0.483746	NA	NA
MAGEC3	3390524	X	140754075	CCCAGCCTTGATGTTCATGTCTTTCCCTTGGTTGCAGTAGCCTGTGGTCG	GeneID:139081	NM_138702.1	140753768	307	-0.139419	0.00256062	-0.0708423	0.00501863	0.467631	0.60705	306.978	298.696
DAK	6770343	11	60858741	CGGTGTGAACTCAGCCTGTTTCAGAGCCTCCACACCATGGTGAGTCATAC	GeneID:26007	NM_015533.2	60858726	15	-0.139478	0.000615943	NA	NA	0.507754	0.647232	NA	NA
GLI2	6400685	2	121266336	TTCTTAACCTTTTCTGCGCCGTGGGCCCCTTGGCAAGCAAGTGAAGTTCG	GeneID:2736	NM_005270.2	121266329	7	-0.139604	7.63748e-05	0.14378	0.0206728	0.388509	0.528113	715.444	524.333
TINAG	1780707	6	54280142	CGACACAATGAAGACAAAAGTGTGAGTTGAATAAAATAAACAGCAAGGTC	GeneID:27283	NM_014464.2	54281162	-1020	-0.139613	0.000522413	0.038197	0.00145901	0.400899	0.540511	352.122	350.394
XBP1	3780059	22	27527846	CGGGAGCGATTTATACACACGAATATTAACATGGAGAAGTCCGAGAAACC	GeneID:7494	NM_005080.2	27526560	-1286	-0.139633	0.00110134	NA	NA	0.25984	0.399473	NA	NA
WFDC6	4890564	20	43602167	TTGTCACAGCTACAGCATTGGATTAAAAGTCACACCCTGAAGCATTAACG	GeneID:140870	NM_080827.1	43601548	-619	-0.139763	0.00174304	0.165873	0.0275137	0.603839	0.743602	308.205	388.891
ABTB1	870482	3	128873625	CGACTAGTAGGTTTATTTTGAGAAAGGAGTTGAGCTGCAGCAACAGAAAA	GeneID:80325	NM_032548.2	128874471	-846	-0.139777	1.70479e-13	0.402878	0.162311	0.0953232	0.2351	1452.1	1899.41
C7orf34	6980025	7	142346962	CGCCCTCTGCAGGTAGGTGGAAAAAAAGACAGGAGCCATACAGAGAAAAC	GeneID:135927	NM_178829.2	142346721	241	-0.139867	1.94871e-08	0.0710185	0.00504362	0.175259	0.315126	320.154	326.936
TMPRSS11F	5910767	4	68678590	CGGAGTGGAGAAGACCTGAGTTATGAACCAGGGCACCTGTCTCAGCCATT	GeneID:389208	NM_207407.1	68678182	-408	-0.139989	0.000190509	NA	NA	0.529122	0.669111	NA	NA
KRTAP15-1	3450634	21	30734946	TCATCCAGGAATTTCCAGGCAACTTGTTACTAACCAGCCTTTGGGTCTCG	GeneID:254950	NM_181623.1	30734517	429	-0.140571	0.000208403	-0.203455	0.0413938	0.541641	0.682212	305.891	295.405
UGT1A6	7570603	2	234265162	CGTGGTGAGAATCCTAGAGCAGGAGTCAGAAAGCCTGGTATCTGCTTCTG	GeneID:54578	NM_001072.2	234265060	102	-0.14062	0.00177183	-0.475895	0.226476	0.501619	0.642239	530.857	345.966
AGXT	4210315	2	241456532	CGCAGCAGGGTTGAGTTGTTGCAACATAGACCACAGGGCCTGCCAAGCCT	GeneID:189	NM_000030.1	241456835	-303	-0.14064	1.75927e-06	-0.00383039	1.46719e-05	0.249464	0.390103	354.013	301.134
G6PC	6520368	17	38306255	GCATCAACCTACTGGTGATGCACCTTTGATCAATACATTTTAGACAAACG	GeneID:2538	NM_000151.1	38306341	-86	-0.140798	7.00589e-06	0.185702	0.0344852	0.284354	0.425152	317.159	306.555
OAS2	4760142	12	111900901	GGAACTGTTCGGGTTCCTGCAGGACGTCACAGATGGTGTTCACCATCTCG	GeneID:4939	NM_002535.2	111900657	244	-0.140964	0.00114195	-0.287397	0.0825969	0.179079	0.320043	486.604	470.021
BFSP2	4060209	3	134600110	CGCAGGTAGAGGTAAAAAACCTGGTCGCCTACTAGAGGACCCTGTGTGCA	GeneID:8419	NM_003571.2	134601480	-1370	-0.141021	0.00127731	-0.205071	0.0420541	0.689229	0.83025	606.109	388.46
MB	3710136	22	34349198	CTCTGAAGCCAGACTACCTGGGTCCCAATCTTGGGCTTGGTATTTCCTCG	GeneID:4151	NM_005368.2	34349347	149	-0.141122	0.00748615	-0.625279	0.390973	0.714836	0.855958	621.419	314.439
SCN7A	4920528	2	167051230	CAGATATAACAGTGTCAAATCTGCAGTTCCCAAGTCCTGGAGCTTCTACG	GeneID:6332	NM_002976.1	167051724	494	-0.141145	0.000973865	0.285894	0.0817356	0.653245	0.79439	360.597	535.668
CNR1	430059	6	88912435	CGGAGCCATGGCTGACATGACTTCTAGGATGTCCACATCAACCAAGAAAA	GeneID:1268	NM_016083.3	88911775	-660	-0.141177	0.0005978	0.314795	0.0990958	0.442074	0.583251	534.669	822.648
OR12D3	3390091	6	29450658	CTGGCTATCATGGCCTTTGACCGTTTTGTTGCCATCTGCAATCCTCTTCG	GeneID:81797	NM_030959.2	29451047	389	-0.141227	0.000277477	0.0416762	0.00173691	0.614663	0.75589	335.33	328.149
MYT1	3170202	20	62266251	CATTAGCAGCGGTGGCACGGGCTGGCGGAGGAGGCTCCTTTGTAAATACG	GeneID:4661	NM_004535.2	62266271	-20	-0.141488	0.0181186	-0.410241	0.168298	0.709002	0.85049	578.795	325.499
THRB	2470670	3	24512439	ATTAATAGGGCGGCCGTTCTGGGACCTGAGGAGTGTCTCAGCCCTGTACG	GeneID:7068	NM_000461.2	24511317	-1122	-0.141541	4.46595e-06	-0.0889748	0.00791652	0.268403	0.409945	309.492	307.228
CARD15	6900767	16	49288314	CGTGTGAGCCATACACACCCCAGCTAGTGACGTTGGGCTTCTGTGGACAC	GeneID:64127	NM_022162.1	49288551	-237	-0.141706	6.65034e-06	0.086337	0.00745408	0.220204	0.36191	667.582	767.07
MCM5	5960689	22	34125374	CGGGCCCCACGACCGGGAAGCGAATACTCCACAGGGCACAGTCTCCCAAT	GeneID:4174	NM_006739.2	34126128	-754	-0.141742	0.00135897	-0.32183	0.103575	0.770732	0.912474	1225.17	731.127
FLJ44674	2850315	16	47935998	CGGGAGCAGACTCAGCTGTCCCCAAACCTGAATGCAGGTAACAAGGGCAG	GeneID:400535	NM_207449.1	47936030	-32	-0.141844	0.000101372	NA	NA	0.569051	0.710894	NA	NA
EDARADD	4890440	1	234624096	GGTTGGGCTGCTAACAAGCTCACTCAACTAGTGTTTCCTGACGGCCAACG	GeneID:128178	NM_080738.2	234624303	-207	-0.141853	0.0105637	-0.196031	0.0384282	0.310179	0.452032	313.779	309.615
RUNX1	50672	21	35343811	CGCTGGCATCAAGCCGCTGCTCCGACAGGATGTGGATCCCATCATTTAAA	GeneID:861	NM_001754.3	35343465	-346	-0.141898	0.0022582	NA	NA	0.262655	0.404553	NA	NA
FCGR3A	360176	1	159786020	TAGGAGCTCAATCCACAGCTATAGATGTGGTGAGGGGTCCCATCCCTTCG	GeneID:2214	NM_000569.6	159786442	422	-0.142109	0.000349417	NA	NA	0.456753	0.598862	NA	NA
RETNLB	60441	3	109958816	CGTGGTTAGTTTCCAGGGAGTAAAGATGGAAGAACAGCGTCATCAGTACT	GeneID:84666	NM_032579.1	109958820	4	-0.142132	0.00315947	-0.233244	0.054403	0.592064	0.734196	358.516	328.03
RNASE6	2510753	14	20319245	TTAGTCCAAAGCTCAGAAGCTGTTGTCTGCCTTTCTTCTCTAACCCTTCG	GeneID:6039	NM_005615.2	20319050	195	-0.142176	0.000425743	-0.129297	0.0167177	0.31226	0.454436	664.671	686.566
MGMT	3120669	10	131154830	CGGCATCGCCCACCACAGGCCCTGGAGGCTGCCCCCACGGCCCCCTGACA	GeneID:4255	NM_002412.2	131155456	-626	-0.142195	0.000264115	-0.253356	0.0641895	0.587718	0.729914	1698.52	1707.35
MESP1	4900397	15	88095766	CGGGGTCAGAAAAACGAAATCTAGATCCTAGGTTTGGGGCCTGCCTTCAC	GeneID:55897	NM_018670.1	88095552	-214	-0.142371	0.000150903	-0.306708	0.09407	0.643184	0.785555	596.089	420.195
RGS14	4290369	5	176717902	AGATGGCCCAGCCGGGAGCCTGGTACAACCCTGGCAGTGAGGCCAGAGCG	GeneID:10636	NM_006480.4	176717450	452	-0.142373	4.59546e-05	0.020034	0.00040136	0.370478	0.512852	468.976	424.853
UBQLN3	1070086	11	5487120	ATGGCACGGTGCTGCCTCTTGATGACCAGGTGGACAGTGAGGCCATCTCG	GeneID:50613	NM_017481.2	5487729	609	-0.142442	5.1253e-05	0.167446	0.0280382	0.591953	0.734395	498.947	560.63
IL18RAP	5810010	2	102402267	CGAGACCAAATCTCTGTCTGCAGGTGTTCTCTGTGTAAAGTAGTTTAAGT	GeneID:8807	NM_003853.2	102401686	581	-0.142657	5.94239e-06	0.162495	0.0264047	0.337386	0.480043	688.045	897.023
SLC6A18	6280482	5	1278224	CGATTAAAATATGCCTCAGTCTTGGGAATCCTGGTGTCTGCAACAAAAAA	GeneID:348932	NM_182632.1	1278470	-246	-0.14269	0.000203552	NA	NA	0.328076	0.470766	NA	NA
RRM2	4480202	2	10179358	TGACCCCTATTGTCACCCTTGCCTTAAGAATTGCAAACTGTGGCTGGGCG	GeneID:6241	NM_001034.1	10180184	-826	-0.142795	0.000368614	-0.375666	0.141125	0.462564	0.605359	845.561	391.899
MARK2	6480291	11	63412479	GCTAGGGTTTTATGACAGCCGTGGCTGCAGTGAGTCTCCTCGACCTCTCG	GeneID:2011	NM_017490.1	63412651	-172	-0.142838	4.73032e-08	-0.236948	0.0561444	0.149628	0.292466	332.106	316.868
TMEM40	3420026	3	12776112	TTGGAATATCTTCCTTCCCCTCTGGGACGCGCAGGGCAGGTTGGGACACG	GeneID:55287	NM_018306.2	12775808	-304	-0.143119	2.30853e-06	NA	NA	0.67037	0.813489	NA	NA
ZNF511	3870670	10	134971285	TGCATTGTAGGCCGTACACCATCCAGGTCTGCGAGTGACTCTGATGATCG	GeneID:118472	NM_145806.2	134972413	-1128	-0.143154	3.83655e-07	NA	NA	0.212138	0.355292	NA	NA
ST18	6290521	8	53484874	CGCAGAGGCGCTGCAACTTGCTAACTTTGCTCTGTGTTATTTACCAACCG	GeneID:9705	NM_014682.1	53484856	-18	-0.143336	0.00771543	0.0879643	0.00773771	0.588525	0.731861	420.842	330.473
ACSM1	1030343	16	20610738	ATTCTTACTCCACCTCATCTCATTGTTTCTGTACATCAGTTTCATTCTCG	GeneID:116285	NM_052956.1	20610079	-659	-0.143789	0.000123395	NA	NA	0.244416	0.388206	NA	NA
TRIM49	3930161	11	89181320	TTGACTTTAAACCAAAGCTTTGATTCATGACCACTGGGATCCAGCCAGCG	GeneID:57093	NM_020358.2	89181391	71	-0.14395	6.79066e-06	NA	NA	0.610291	0.754241	NA	NA
DEFB118	4920286	20	29419723	CGGGGAGACACACAGATAAGTAGACCATTCAAAAGTAGGTTTATGCTAGA	GeneID:117285	NM_054112.1	29420089	-366	-0.143966	0.000104392	-0.185636	0.0344605	0.425474	0.56944	330.802	328.431
XAGE5	3310553	X	52857461	ACAGAGGACAAATTCCAGACTCCTCAAGGGACATCAAGGCTGGAATGTCG	GeneID:170627	NM_130775.1	52857953	-492	-0.143969	8.65671e-06	NA	NA	0.628615	0.772584	NA	NA
DCD	4730129	12	53328560	CGGGCACCAGCCAGCCCCAGCCAGCCTTTGTTGACTTAACAGGTGGCTCT	GeneID:117159	NM_053283.1	53328413	-147	-0.14397	2.36507e-05	-0.190797	0.0364033	0.480087	0.624057	323.656	313.002
FSHB	6060435	11	30208049	TTATTGAACAAACATCATTTCTCACCTGGGTTATTGATAGCATCCTAACG	GeneID:2488	NM_000510.2	30209139	-1090	-0.144114	0.00011844	-0.0671773	0.0045128	0.400618	0.544733	335.614	318.883
MORC1	840017	3	110319490	CGCCCGCCATGAAGAAAGGTTTTGCCCGTCCCCTGAGGAATACTCAGCAA	GeneID:27136	NM_014429.2	110319658	168	-0.14422	0.000413676	NA	NA	0.785369	0.929588	NA	NA
EMR3	4220373	19	14646593	CGGGTATCCCACGCCAGCCAGCCCTGGAAGCTCTCTACTGTGCCGTAAGC	GeneID:84658	NM_032571.2	14646810	217	-0.144372	6.16053e-05	0.309525	0.0958055	0.353146	0.497518	414.811	694.934
KRTAP6-2	4920441	21	30892868	CGGTGTCCTCAATAGTAGTAGCCAGAGCCGCATCCATAGCCACAGCCACA	GeneID:337967	NM_181604.1	30893064	196	-0.144582	0.000113525	-0.0439887	0.001935	0.625525	0.770107	329.95	339.945
SEC63D1	4590278	1	91591175	CGTGGATACTATAAAATATTTTGGAAAATTATTTTTAAGAGGAAAAAAGG	GeneID:374992	NM_198550.1	91590782	-393	-0.144822	0.000105602	NA	NA	0.5035	0.648321	NA	NA
CUEDC1	4780608	17	53335106	CGCTTTGCATTCAGCCAGGCTCCAGGTTGGGCACAAACCCTATAGCAGAG	GeneID:404093	NM_017949.1	53335749	643	-0.145013	0.000504273	NA	NA	0.343772	0.488785	NA	NA
FLG	2650653	1	150565702	CGCAAAGATTTTGAACAGTAGTGGACCAATATGGGCTCGTCCAAGAAATA	GeneID:2312	NM_002016.1	150564303	-1399	-0.145117	0.00969411	NA	NA	0.649839	0.794956	NA	NA
CCL22	2640703	16	55950265	TACAGGACAGAGCATGGATCGCCTACAGACTGCACTCCTGGTTGTCCTCG	GeneID:6367	NM_002990.3	55950219	46	-0.145144	0.000134756	-0.239494	0.0573575	0.680578	0.825722	739.737	763.292
TECTA	3450750	11	120478484	CGGTTTTGATGGTCTTGGGATTAGCCACTAAACACACCTGGTGTTCTGTT	GeneID:7007	NM_005422.1	120478585	-101	-0.145147	0.000851952	0.288433	0.0831937	0.491636	0.636783	330.024	345.62
CCL3	4150551	17	31441688	GGTCACCAGGGACCCTGAGTTGTGCAACTTAGCATGACAGCATCACTACG	GeneID:6348	NM_002983.1	31441600	-88	-0.145209	0.00017589	0.0247713	0.000613615	0.242406	0.387616	1565.81	3220.28
HIST1H2BJ	70544	6	27209920	GGATATTAGGCCTTTCCAAATGAGCCATCTTTCTTGGGCTCCAGATAACG	GeneID:8970	NM_021058.3	27208554	-1366	-0.145372	6.20866e-08	-0.302299	0.0913849	0.163803	0.309174	476.117	366.98
UBE2V2	5090201	8	49083013	CCCTAGCTGTTCAAATTTATTGTCCAACTCTTTTGAATCGTTTATCAACG	GeneID:7336	NM_003350.2	49083548	-535	-0.145459	0.000687083	NA	NA	0.56252	0.707979	NA	NA
HSPA12B	5960327	20	3660191	CGAGTCAGCTGCCTTTGAAAGCTCCACGAGGGACCTAGCAGAAATTCATT	GeneID:116835	NM_052970.3	3661356	-1165	-0.145505	8.5735e-05	0.344787	0.118878	0.559837	0.705342	853.899	2065.74
ASGR2	2340647	17	6959140	CGCTGTGATCCTGGTCAGGGATATTTGGAGACACCCACAGTTCTGGTAAA	GeneID:433	NM_001181.2	6958803	-337	-0.14558	9.09459e-06	-0.0769327	0.00591864	0.233668	0.379248	401.67	381.603
CLDN18	1440497	3	139200288	CGGACCATGTAATGGAGGCGGTTACTCACCAGTGCCACCTGGGCTTGCCC	GeneID:51208	NM_001002026.2	139200348	-60	-0.14562	0.00139406	0.328117	0.107661	0.709819	0.855439	687.049	4483.93
PLEC1	6450066	8	145121460	CTGAGGTCCGGGCAGTCTCTGAAGATGTCTCCAATGGAAGCAGTGGCTCG	GeneID:5339	NM_201379.1	145121531	71	-0.145736	2.01179e-13	-0.27802	0.0772949	0.125332	0.271068	368.775	345.279
TRPM2	1450239	21	44597722	CGGCCGTTCATAATGGTAACAACCTCAGGTGACTGCAGGGCCAGAGAAAG	GeneID:7226	NM_001001188.3	44597912	-190	-0.145758	4.71928e-08	-0.00500025	2.50025e-05	0.100827	0.246585	330.115	321.71
SSX6	540202	X	47852194	AGAAGGTTGTGTCCCTGGAGCCTCAACTGATAGACCCCACATCACCTTCG	GeneID:280657	NM_173357.2	47852032	162	-0.14598	4.93381e-05	NA	NA	0.41898	0.564961	NA	NA
PNPLA4	6370008	X	7855031	CCCCAAGATGAGGCACATTACAGGGCCTCGAATTTAGGGACCTAAGACCG	GeneID:8228	NM_004650.1	7855443	412	-0.145982	3.31078e-06	NA	NA	0.266132	0.412114	NA	NA
IL18RAP	4210187	2	102401659	TTTTCCTTTTTCCTCCAGTTATAATCCTTTATTTTTGAGCTGGTGTAACG	GeneID:8807	NM_003853.2	102401686	-27	-0.145985	2.06941e-05	-0.0255876	0.000654725	0.328168	0.474153	688.045	897.023
LCE3E	4390070	1	150805512	CGTGCCCACTTAGACTCACAGCAATCTGTCCCGGGTGGAGAGCAATGTGA	GeneID:353145	NM_178435.2	150805872	360	-0.146003	0.000252555	NA	NA	0.448579	0.594582	NA	NA
SLC39A12	1170041	10	18279799	CGGGAACTGGGGCTTGATCAGAGGCTGAATCCCGTGCGTGGACCAGAACG	GeneID:221074	NM_152725.1	18280827	-1028	-0.146068	0.00074993	0.189432	0.0358845	0.615764	0.761832	290.095	317.905
CBFB	10754	16	65620188	CCAAGGACTTAGGTTTCCTCGCGTTCAAGTGACAATCTGGGGTTACTCCG	GeneID:865	NM_001755.2	65620551	-363	-0.146181	1.79564e-16	NA	NA	0.0997255	0.245906	NA	NA
B3GALT5	240477	21	39949830	CGCCAGTGGAAACTGCCTGTACAGACCCGACCAGTAACAGGCACCACGTA	GeneID:10317	NM_033170.1	39951124	-1294	-0.146192	0.000309121	-0.220659	0.0486904	0.644527	0.790719	330.288	335.059
SIGLEC12	50278	19	56697802	CGCTCAATGATGGACAGGATTTCATGGGAGAAGAAATGCACCTGAATTCA	GeneID:89858	NM_033329.1	56696855	-947	-0.146357	0.00219986	NA	NA	0.752639	0.898997	NA	NA
UNQ3033	4900630	19	59258650	GCACACCTGCGGTGGGTGGGTCTGGGCTGTGGGTTCTGTGAGTTCTGCCG	GeneID:284415	NM_198481.1	59259019	369	-0.146412	0.00349646	-0.0626889	0.0039299	0.524272	0.670684	284.201	300.384
SIRPD	6550561	20	1487641	CGGGTCAGTATCCAAGAGTGCCAGCTTTGGAATCAGATATAATCTAGGCT	GeneID:128646	NM_178460.1	1486343	-1298	-0.146471	0.000223148	NA	NA	0.615004	0.761475	NA	NA
CDH13	3520521	16	81229021	CGAGATGAACTGAATCCCTGTCTCATGGAGCTTACAGTTTTGTGGGAACA	GeneID:1012	NT_010498.15	NA	NA	-0.146498	6.6927e-05	NA	NA	0.581081	0.727579	NA	NA
MCM5	1740608	22	34125394	GGTCCAGGTGCCCATTTTGCATTGGGAGACTGTGCCCTGTGGAGTATTCG	GeneID:4174	NM_006739.2	34126128	-734	-0.146522	0.000618576	-0.382351	0.146192	0.652572	0.799094	1225.17	731.127
NOS3	1400615	7	150318645	CGCCCACAGACGCCCCGGGGCTCAGTTACTGTCTAAGTGTTAGAAATAAA	GeneID:4846	NM_000603.3	150319080	-435	-0.146597	0.00125164	0.0119434	0.000142644	0.754168	0.900765	377.702	383.351
FLJ40235	6550288	19	56452928	AAGAAGCTCACCCAAGCCTTGTGTCCAGTGTTTTTATTGGGCCTCCATCG	GeneID:284369	NM_173635.1	56452776	152	-0.146613	8.5735e-05	-0.0502433	0.00252439	0.476542	0.623155	315.472	316.193
SRPX2	20239	X	99785577	CTCCCAACTCTGAACTGTCTTGCAATCTATATGGTATCACGTCAGATACG	GeneID:27286	NM_014467.1	99785881	-304	-0.14673	0.000938282	NA	NA	0.416733	0.563462	NA	NA
CACNG5	3710711	17	62303813	CGGCTCTGAGAAGACGAAGATGAGGAGCCAGTAACTAAAGTCAAACCCCA	GeneID:27091	NM_145811.1	62303913	-100	-0.14673	2.57678e-05	-0.056481	0.0031901	0.266966	0.413696	334.855	322.373
SPAM1	430332	7	123353161	CGTGGAGGTAAAGGAGGGAACCTAATGTAAGAATACTGAATTTGCCAATT	GeneID:6677	NM_003117.3	123352565	596	-0.146827	0.000146622	0.0799815	0.00639705	0.546022	0.692849	376.132	372.572
CD28	3130768	2	204279460	ACTCAAACCACAAGGCATCCTGACTGCAGCATTTCACACAGGATATAACG	GeneID:940	NM_006139.1	204279443	17	-0.146872	8.79036e-05	-0.285677	0.0816113	0.329533	0.476405	543.956	488.281
PDILT	6180041	16	20323467	AGGGACTTCATTTCTGCCTGTGGATTCTTTAGAATGCCCAGTCGTCTGCG	GeneID:204474	NM_174924.1	20323534	67	-0.147005	0.000450412	NA	NA	0.760442	0.907447	NA	NA
DMRTC1	6590561	X	72014529	GGCTGAGGCAACCACAGGCTGACATCAGAATTAGGTCCTCGTTCTCCACG	GeneID:63947	NM_033053.1	72014423	-106	-0.147164	6.7427e-05	0.0461261	0.00212762	0.556828	0.703991	448.135	443.486
SERPINB13	360209	18	59405541	CGCAAGGTGGAAAACCACTGCTGAAGCAGATGTGGAGAACTATAAATTAA	GeneID:5275	NM_012397.2	59405580	-39	-0.147312	0.00132244	-0.455551	0.207527	0.70892	0.856232	2310.7	351.088
CD33	6770647	19	56420398	CGACAAGAACTCCCCAGTTCATGGTTACTGGTTCCGGGAAGGAGCCATTA	GeneID:945	NM_001772.2	56420175	223	-0.14737	0.000820395	0.235852	0.0556261	0.479196	0.626566	703.345	1451.03
KIAA0157	2450102	10	126480089	CGCCCGGCTAGAATGTTGTCTTTTAATACTAAGGTTTCACTTGCAAAGGG	GeneID:23172	NM_032182.2	126480382	-293	-0.147508	1.32801e-05	NA	NA	0.683302	0.83081	NA	NA
MGC9712	360543	7	1562743	CGGCAGGCACACAGCACTGTGGATATACTTACCGCCACCGAATCGTTCAC	GeneID:202915	NM_152689.2	1562273	-470	-0.147521	0.0117921	-0.387799	0.150388	0.497515	0.645036	1055.25	426.959
FGF18	730202	5	170778215	GCTCAAGCAGAGCTTGGCTGACACCAGCTCTAGACAGTGAGGCAGGTACG	GeneID:8817	NM_033649.1	170779272	-1057	-0.147704	2.60548e-07	0.03971	0.00157688	0.455812	0.603516	417.787	415.072
CD1D	2570719	1	156416419	CGGTGGAAATATAGAAAAAGGAATTTATTCAAGAGGTATTCAAAAAGAAG	GeneID:912	NM_001766.2	156416361	58	-0.147885	0.000325563	0.170965	0.0292291	0.60177	0.749656	701.984	947.67
NXF2	5310296	X	101365532	CGGGGCAGGTAACAATTCAGAGCCCCCCAGTCCAACAATGGTGCTATACC	GeneID:56001	NM_022053.1	101365595	-63	-0.147979	0.000236182	-0.144317	0.0208275	0.594699	0.742678	354.639	357.856
ZNF610	4290520	19	57539745	CGAGGATCTGGAACCACAGAAATCAAACCAGCAGATAGGGAGCAACTACT	GeneID:162963	NM_173530.1	57540494	-749	-0.148011	0.00101093	NA	NA	0.646031	0.794042	NA	NA
FN5	2600242	11	92925818	CGTCAAAGGCCTGGCCACAGATGGAGCTTACTCATTCCAGGCATGGGATG	GeneID:56935	NM_020179.1	92925437	-381	-0.148063	5.90352e-05	NA	NA	0.49858	0.646643	NA	NA
ASB12	3290445	X	63362769	GGGATGGCAACTTGACACCACAAAGTATGGTTCTATTGGCTTAGCCAGCG	GeneID:142689	NM_130388.2	63362228	-541	-0.148117	0.000379713	-0.0597848	0.00357422	0.325922	0.474039	323.603	316.826
LSP1	630487	11	1830896	TGTAGTCTGGGCCCCACAGGGTGCTGGCAGATCCCTGGAGTGGGTGTACG	GeneID:4046	NM_002339.2	1830776	120	-0.148214	0.00159223	0.00859738	7.39149e-05	0.422662	0.570876	849.161	1155.68
VNN1	6250551	6	133076928	CGTGGTGTCCAGAACTTAGTACCTTAAACTACGGAAGTTAATTAAGAAAA	GeneID:8876	NM_004666.1	133076881	-47	-0.148328	0.000245881	-0.249229	0.0621151	0.435176	0.583504	1036.08	669.863
LOC284912	7610692	22	34361187	ACCCTTTTGTGTGATTCAGGTCCTCAGTGATTGGATGATACCTGCTCACG	GeneID:284912	NM_203375.1	34361128	-59	-0.148622	2.11315e-06	0.0444191	0.00197305	0.513611	0.662233	340.051	360.314
AFF3	460239	2	100125566	CCCTGCCACAAGTGAGAGTTGGCCGGTTGGGTATCTGGTTTAGTCACTCG	GeneID:3899	NM_002285.2	100125469	-97	-0.148649	0.000333983	NA	NA	0.343977	0.492626	NA	NA
HEM1	2750341	12	53177758	ATTGCAGAGGCAACAGAAGACCAGTGCACCAACCAGGCTGGGTCCCTCCG	GeneID:3071	NM_005337.2	53177780	-22	-0.148832	0.000779808	-0.122544	0.015017	0.310775	0.459607	1439.86	2039.97
MYH4	770528	17	10314453	GGGCATATGTGATGGCCCATCCATCTTTTCAATCCACAGGGAGAATATCG	GeneID:4622	NM_017533.1	10313601	-852	-0.148936	0.000421854	-0.245039	0.060044	0.491627	0.640563	317.528	315.783
SPATA19	4290446	11	133220286	CGTCAATGTCCTGGAACAAATTGGCAAGTTGGTGACCTCAGAAAACCTAG	GeneID:219938	NM_174927.1	133220602	316	-0.149061	3.92784e-07	NA	NA	0.389726	0.538787	NA	NA
CDH20	6290343	18	57308859	CGGTGGTCGTAAGGTCCATCAGCCCCCAGAAGTACAAGGACATGCCAAGT	GeneID:28316	NM_031891.2	57308755	104	-0.149153	8.21614e-05	0.0944267	0.00891639	0.612527	0.76168	300.587	304.426
TP73	4610521	1	3596970	CGCCGGTCAGCGCCGGCTCCATAATTAAACCCACCAGGGCTCCTTCCGAG	GeneID:7161	NT_004321.17	3597096	-126	-0.149239	0.0210933	-0.112368	0.0126265	0.759974	0.909213	331.637	320.212
DNTT	460647	10	98054352	CGACCAAATCTTGAAATTTGATGTCTTGAGGAGAGGAGGCCATCAAGGCA	GeneID:1791	NM_004088.3	98054075	277	-0.14941	2.57678e-05	0.106855	0.0114181	0.554515	0.703925	408.936	322.28
MYH1	1940475	17	10360224	CGGTCTTCTACTCATGAGAGTAGTTAATAGTTTTTGAAAAGTAGTAGATG	GeneID:4619	NM_005963.2	10360684	460	-0.149871	0.000811307	-0.0840546	0.00706518	0.579979	0.72985	315.955	315.279
HEPH	7510647	X	65299254	TACTGGTGCTTCCACCTGCCTTGGTCTGAGTTGCAGTCCATGGGGCAGCG	GeneID:9843	NM_014799.2	65299388	-134	-0.149888	0.00029696	-0.0307466	0.000945351	0.484337	0.634226	322.506	323.701
PYHIN1	7380338	1	157168562	CGCTGTATATGCATAACATGGATACGGCTAGAGAACATTACCCTAAGTGA	GeneID:149628	NM_152501.2	157167974	588	-0.149922	0.000295708	NA	NA	0.650154	0.800075	NA	NA
DEFB126	4830296	20	71163	CGGGAGGATGTAGGATATTGTGCCAACATAGCTTCAATCTATTGGCTAGC	GeneID:81623	NM_030931.2	71252	-89	-0.15011	1.51008e-05	-0.204121	0.0416653	0.426913	0.577023	388.855	328.923
CHRM5	2070554	15	32136544	CGACCACAAACTGGCTCTTTTAGATGCTTTGTGGTGCTAACACTGGATTG	GeneID:1133	NM_012125.2	32137718	-1174	-0.150129	0.000172318	0.00535121	2.86354e-05	0.551784	0.701914	323.047	305.848
PMCHL1	1440671	5	22177396	ATTCGGTAATATAAAATCCTTGCTGGCCAGCCTGGCTTTAGAATACTTCG	GeneID:5369	NM_031887.2	22178218	-822	-0.15014	0.00270809	-0.0172776	0.000298516	0.462457	0.612597	297.849	300.036
C11orf38	5080341	11	125154444	TTATCCATTCTACCTACTAACTTCTCACATGGGTTTATTATTCTCTGTCG	GeneID:399967	NM_212555.1	125153924	-520	-0.150179	0.000312784	NA	NA	0.650791	0.80097	NA	NA
FTHL17	7560176	X	30999613	CTTGCTCGTGCAGGTAGTGGCTCTCCAGGAAGTGGCACAGCTGGGGGTCG	GeneID:53940	NM_031894.1	31000091	478	-0.150212	0.000262704	-0.209233	0.0437784	0.474892	0.625105	379.086	353.712
MARCH1	7570672	4	164754202	CTTGTGGAATCATCTTCCTCTCTCGTAAATGAAGTAACAGCAAAATAGCG	GeneID:55016	NM_017923.2	164754226	24	-0.150241	0.000537136	NA	NA	0.47765	0.627892	NA	NA
CRP	6040221	1	157951055	CGCCACTATGTAAATAATTTTCCAACATTGCTTGTTGGGGCAGGTGTCAG	GeneID:1401	NM_000567.2	157951003	-52	-0.15026	0.00136813	0.067908	0.0046115	0.670505	0.820765	274.248	272.947
EVI2B	5960373	17	26665459	GATAACCCAACTGGCAGCTTTTCTTCTTAGAACATGTAATTTTCTCTTCG	GeneID:2124	NM_006495.2	26665217	-242	-0.150308	0.00612006	-0.0547984	0.00300286	0.29668	0.446988	2484.83	4196.69
CCL7	6350474	17	29620999	ATGTAAGGGATATTCCCCTTTTCCCTTTGGAGTGGTATCCCTAGGACACG	GeneID:6354	NM_006273.2	29621353	-354	-0.15043	0.000221748	-0.105841	0.0112023	0.578258	0.728688	794.84	516.243
AHR	4480747	7	17304501	CGGTGGGTCAGCTAACTTGTGGCTAAGAATTACAATTAACTGGTAGACAA	GeneID:196	NM_001621.2	17304771	-270	-0.150545	4.01754e-06	NA	NA	0.274012	0.424558	NA	NA
ATP4A	3420193	19	40746359	CGGCCTTCCCCATGGTGCCCGGTGCCTGTGCTCCCACCCAACAGAGCCTG	GeneID:495	NM_000704.2	40746400	41	-0.15075	6.82832e-05	-0.0703097	0.00494346	0.37931	0.530061	344.864	316.151
CLDN18	4040411	3	139200297	CGTCAGGAACGGACCATGTAATGGAGGCGGTTACTCACCAGTGCCACCTG	GeneID:51208	NM_001002026.2	139200348	-51	-0.150833	0.00156222	0.308586	0.0952251	0.710464	0.861297	687.049	4483.93
TP73	5360470	1	3597152	CGGCCCGCATGTTCCCCAGCATCCTCGGCTCCTGCCTCACTAGCTGCGGA	GeneID:7161	NT_004321.17	3597096	56	-0.150853	0.0072298	-0.0976915	0.00954363	0.725517	0.87637	331.637	320.212
BMP15	2190431	X	50670568	CAAGATGGTCCTCCTCAGTATTCTTAGAATTCTTTTTCTTTGTGAACTCG	GeneID:9210	NM_005448.1	50670524	44	-0.151152	0.000960758	-0.117726	0.0138594	0.410263	0.561415	337.852	335.655
C18orf20	5220400	18	59967523	CGCCTTAGAGCAGGGAGCCTTTATCTGAAGTCATTGAACTTCTGGGGAAA	GeneID:221241	NM_152728.1	59967244	-279	-0.151292	0.000426423	NA	NA	0.538374	0.689665	NA	NA
CCT6A	990703	7	56085732	TGTTCTTTGTAAGAATGACTCAACTAGGGGCCAGGGCTGGGTGGCTCACG	GeneID:908	NM_001762.3	56086872	-1140	-0.151623	6.91939e-06	NA	NA	0.302739	0.454363	NA	NA
CPS1	3310239	2	211128183	AAAAAATATACCACATGACTTCATGCCTCTAGGCTATTGCTCATGCCACG	GeneID:1373	NM_001875.2	211129583	-1400	-0.151624	0.000262473	-0.0981346	0.0096304	0.597051	0.748675	882.783	478.079
FLJ23577	6220554	5	35653786	GCCTGGATACGCTTCCATAGCAAAGGGTTGCCCTTGGCTACAGGAGGACG	GeneID:79925	NM_024867.2	35653746	40	-0.151682	2.81656e-09	NA	NA	0.0885395	0.240222	NA	NA
CNTNAP4	1170086	16	74901369	CGGACTAAAACAGGGGCCAGTTGCTACAGGAGTTATTATTTGGCTTCTTG	GeneID:85445	NM_033401.2	74901250	119	-0.151825	0.000100034	NA	NA	0.576467	0.728292	NA	NA
MAGEB4	5860736	X	30170043	CCTGAGAACACCTTCAGCAGGCAGATACTACCTTGGCTTTTCAGAAGCCG	GeneID:4115	NM_002367.2	30170090	-47	-0.152006	2.27666e-05	0.0584567	0.00341718	0.506467	0.658473	332.281	320.299
MAGEB6	2070482	X	26120444	CGCCCACCTGGCGCTCCCTGCGTAACAGTAGCTGCAGGGCTCTGTTACTC	GeneID:158809	NM_173523.2	26120478	-34	-0.152066	0.000244557	-0.183556	0.0336928	0.497228	0.649294	354.342	349.122
PABPC5	3060102	X	90575679	CGGCAGCTCAACAGTTTCAACGTTTTGTGGCACTAAACACCATCAAAAGC	GeneID:140886	NM_080832.1	90576253	-574	-0.152264	0.00112354	0.226073	0.0511089	0.643688	0.795952	292.213	308.172
MKRN3	240706	15	21361757	GTGCTCTGCCTGGTTTTTACCGCAATTTTCCAATCTGACATATTTTTTCG	GeneID:7681	NM_005664.2	21361547	210	-0.152464	0.000750635	-0.214673	0.0460847	0.427321	0.579785	338.166	334.496
WDRPUH	5080068	17	9420635	CATTTCCAAGAATGCTAATGAACTCGAACTCGGCAGGCTGGGTTTCTGCG	GeneID:146845	NM_145054.2	9420712	-77	-0.152695	0.00226891	NA	NA	0.126557	0.279252	NA	NA
PLP1	5560685	X	102917634	AAGATATTACACTCTCAGGATAGAATACTGACTACCTGATTCCCAGATCG	GeneID:5354	NM_000533.3	102918410	-776	-0.152732	3.31682e-05	0.102028	0.0104096	0.483665	0.636397	344.539	362.123
SRPX2	6350349	X	99785586	TTCCTTAGACTCCCAACTCTGAACTGTCTTGCAATCTATATGGTATCACG	GeneID:27286	NM_014467.1	99785881	-295	-0.153254	0.00184287	NA	NA	0.466102	0.619355	NA	NA
VPS33A	650358	12	121317886	AATAGTTTATTGAGCAATTAAGTTCCAGGCACCCAGTTAAGCCTCTCACG	GeneID:65082	NM_022916.3	121316970	-916	-0.153515	8.9332e-09	-0.218674	0.0478182	0.290308	0.443823	1163.2	1047.09
CD53	6280369	1	111217704	CAATTTTCTGAAGACCAGAGCACATAGGAAATCTCCCCAATGTCATCTCG	GeneID:963	NM_000560.2	111217296	408	-0.153578	8.73158e-06	NA	NA	0.313126	0.466704	NA	NA
LILRA1	1070427	19	59796968	GACCAAGGTCCATGCTGCAGGCAGACTCAGATCAGCAGAGAAGCATCTCG	GeneID:11024	NM_006863.1	59796925	43	-0.153831	9.23233e-07	0.135136	0.0182617	0.314811	0.468642	352.176	377.72
DEFB106A	70692	8	7330861	CGCTGCTTTACCTGTTGCCATGACTGGCATGAGTGCATAGGTGTCTCTAA	GeneID:245909	NM_152251.2	7331319	458	-0.154014	9.82553e-06	NA	NA	0.597267	0.75128	NA	NA
EDA2R	1990079	X	65752529	CGGTGTGGTCCTGGACAGGAGCTATCCAAGGTAAGTTATCCTATTCAGTA	GeneID:60401	NM_021783.2	65752598	69	-0.154016	0.000571174	NA	NA	0.544855	0.698872	NA	NA
FOSL1	1430112	11	65424853	CGCCAACCGCCACCCAAAGCTTCGTGGAGTGAGGTCTTTCCACTGGCCTT	GeneID:8061	NM_005438.2	65424573	-280	-0.154037	8.89904e-08	0.322911	0.104272	0.239972	0.394009	408.166	416.693
EMR3	2490747	19	14646849	CGAGGAAATGCCCTGAAAGTTACATCACATTGTCTGAGGATTAGGAAGTG	GeneID:84658	NM_032571.2	14646810	-39	-0.154049	1.54648e-12	0.496032	0.246048	0.160428	0.314478	414.811	694.934
MAGEA3	1400678	X	151688898	GTTGCCAGGATGTGACGCCACTGACTTGCGCATTGGAGGTCAGAAGACCG	GeneID:4102	NM_005362.3	151688896	-2	-0.154322	3.96941e-05	-0.575945	0.331713	0.697882	0.852204	1079.4	319.433
REGL	5340048	2	79237399	ATCAGAGCCTCCTAAATCTGTTCATGTCACACTGTCAGGTTTGGGCTACG	GeneID:5969	XR_000606.1	79236690	-709	-0.154455	0.000202507	-0.101881	0.0103797	0.605034	0.759489	335.258	340.719
NALP9	1240703	19	60941103	TCCATAGGTGAACAGTTGGTATCAGGACGCCATCTGTCCCCAGTTCATCG	GeneID:338321	NM_176820.2	60941580	477	-0.154777	0.000362843	-0.0660457	0.00436203	0.706952	0.861729	312.12	306.2
C11orf38	3140349	11	125154608	CGTCAGAGTGTTTTCAGCAGGGGTGTGGCATCTATGACTTGTTCTCTGAC	GeneID:399967	NM_212555.1	125153924	-684	-0.154892	2.5407e-06	NA	NA	0.487073	0.641965	NA	NA
C16orf28	70402	16	1369016	CGCTTAGGTGACCAGCCTCACCTAGATTTTGCCTCTGCACAAGGGTCAGC	GeneID:65259	NM_023076.2	1369647	631	-0.155075	4.01134e-17	NA	NA	0.0932349	0.24831	NA	NA
C8orf34	2450068	8	69513481	GTGCACATAAGTTCACAAACCCAATTACACAGCACAAAATGATATCCACG	GeneID:116328	NM_052958.1	69512702	779	-0.155099	1.84254e-05	NA	NA	0.369817	0.524916	NA	NA
TRIM40	2640192	6	30212419	CGGGCCCCAAATTAAAAGGGCAAGGTGTCATTGTCATGGCCAAAAGCCAG	GeneID:135644	NM_138700.2	30212489	-70	-0.1551	3.05486e-06	-0.0732902	0.00537145	0.291389	0.446489	338.402	339.483
PAX4	1510243	7	127043912	ACCAGGCATTGAGGCTCTGGTCCTACACACTGGGCATAGAGATGAACACG	GeneID:5078	NM_006193.1	127043016	-896	-0.155534	2.88245e-06	-0.277651	0.0770903	0.451856	0.60739	324.565	315.869
MMP13	4760603	11	102331679	ACCCCTGGATGCATCTTGAATGGTGATGCCTGGGGACTGTTGTCTTTCCG	GeneID:4322	NM_002427.2	102331672	-7	-0.155621	0.00164592	-0.130998	0.0171604	0.679223	0.834845	739.127	280.094
ATP10A	1850487	15	23577342	CGGGCTATGCCACATCGAGACCGCCAACCTGGATGGAGAGACCAACCTGA	GeneID:57194	NT_026446.13	NA	NA	-0.155676	0.002979	0.231142	0.0534268	0.742931	0.898607	286.712	299.073
TRPM6	2680626	9	76692862	TCACAGGTAGTAAAAGCAGTGCGTTAGCTTAAATCTCTGATCTCCTCACG	GeneID:140803	NM_017662.3	76692830	-32	-0.155705	2.12031e-05	-0.161775	0.0261713	0.657952	0.813657	360.324	369.691
REG1A	4050551	2	79200982	TGGGAGCATTGACAGTAAGAGATTCTGGCACCAGTACGAGCCTTTTCCCG	GeneID:5967	NM_002909.3	79201092	-110	-0.156155	0.00051153	0.103054	0.0106201	0.618381	0.774535	348.666	326.573
MAPK15	1820553	8	144869951	AGGTTTTATGTTGCCGAAGCTGGTCTCCAATTCCTGAGTCATTAGCCACG	GeneID:225689	NM_139021.1	144870498	-547	-0.15631	0.000148159	NA	NA	0.63165	0.78796	NA	NA
SCGB1D2	1820397	11	61765641	CGAGGAGCAAGCTTTCTGTGATGTGTAGCCACCCACATGTTGATGGGTTG	GeneID:10647	NM_006551.3	61766300	-659	-0.156408	2.22462e-05	0.0111514	0.000124353	0.403053	0.559461	428.812	343.143
CYP11B2	4120315	8	143997017	CGGTGTCATTCCAACTATACAACATTTTGGAAAAGGCCAAAGCATGGTGA	GeneID:1585	NM_000498.2	143996261	-756	-0.156461	6.29228e-05	0.14139	0.019991	0.506548	0.663009	319.925	322.547
ARPP-21	5130685	3	35658823	CGCCTCACTCAGCAATAAAAGAAGCATGAGGGAAGACAGAGCAGTGCATG	GeneID:10777	NM_198399.1	35658853	-30	-0.156546	9.71837e-05	-0.0418134	0.00174836	0.614389	0.770935	345.264	339.924
FLJ25530	6400291	11	124310748	GAGCTCCCACGGCATTCAGTACATTAGATGGCGGGCACTGGGCCATTTCG	GeneID:220296	NM_152722.3	124311156	408	-0.156692	0.00102711	0.195381	0.0381737	0.649372	0.806064	270.811	278.774
FCRL3	70497	1	155936844	CGGCCTCAGTTCCTAAAGGTGACCAGGGAAAAACTCAAGGAGCTTCTATC	GeneID:115352	NM_052939.3	155937271	427	-0.156838	0.000207645	NA	NA	0.322709	0.479547	NA	NA
RNF126	2450500	19	614973	CGGTATCATCACCCAGCACAGGCCAGGATCATTTCTGAGGTTAGTTCTGG	GeneID:55658	NM_017876.3	614227	-746	-0.156992	0.000662689	-0.180856	0.032709	0.524503	0.681495	665.398	566.53
DEFA1	4210435	8	6824791	CGTCCCCAGCAGTCACCAGAGGTCCGGACAGACGTTCCTAGCAGGGATTC	GeneID:1667	NM_004084.2	6825012	221	-0.157453	0.000205086	0.199517	0.0398072	0.597231	0.754684	373.23	595.791
MAPK13	1690746	6	36205670	CGGGGGTTCATTAGAACCTCCTATCAGATGTGGTTCAGAAGCCTCAGACC	GeneID:5603	NM_002754.3	36206240	-570	-0.157554	1.18792e-05	NA	NA	0.320881	0.478434	NA	NA
GLIPR1	2570593	12	74160681	TTCTTAACCCTGTCTTTTCAGTGGTTTTCAGTGACACAGCACCTATTACG	GeneID:11010	NM_006851.1	74160801	-120	-0.158095	1.19108e-08	-0.184479	0.0340324	0.151815	0.30991	1326.04	1257.32
CABP5	2680468	19	53239260	CGCCTTTATCCCCAGAGTGGAATTGGAAAGTGCATTTTATAAATGGGGAT	GeneID:56344	NM_019855.3	53239116	-144	-0.158148	0.000313756	0.01567	0.000245548	0.513198	0.671346	317.901	327.791
REG1B	3990338	2	79168253	CGGCAGTGAATCTCTTGCTTAAGGAGCAAATCAGCAATCTCTGTAGGAGA	GeneID:5968	NM_006507.2	79168627	374	-0.158475	4.71515e-05	-0.252932	0.0639745	0.701318	0.859793	340.969	338.952
GCET2	3930066	3	113334846	CGCATGTGCAGAATGTCCTAACATGTCAGTGCCTGAACCAACCTGGCTGT	GeneID:257144	NM_152785.3	113334807	-39	-0.158961	3.3595e-05	-0.420936	0.177187	0.206161	0.365122	352.036	342.873
FCRL2	4200021	1	156013029	GGTTCAGCAGATGCATTGAGACCCTTTGCTAATATTCCTCTGTTTAATCG	GeneID:79368	NM_030764.2	156013533	504	-0.158983	5.57898e-05	NA	NA	0.470174	0.629158	NA	NA
SLC17A1	6110754	6	25938901	AGAGGCAACTGACCAAACACTACCCAGTACTCCTCTCTGATTTAAAACCG	GeneID:6568	NM_005074.1	25938776	-125	-0.159178	0.00018657	-0.0178288	0.000317865	0.535296	0.694474	286.986	288.202
DEFB126	4890408	20	71613	CCAAAGGTAGAAATGATCTTGAAATCCCAAACTTCTATCCTGTCACTTCG	GeneID:81623	NM_030931.2	71252	361	-0.159633	3.70794e-05	-0.354232	0.12548	0.514121	0.673754	388.855	328.923
OR2W1	6590278	6	29122025	AGGACATCTGGTGTTTACCCTTGGACGCCTTGTCTCTCTCATTCTTAACG	GeneID:26692	NM_030903.2	29120951	-1074	-0.159687	0.000174517	-0.0733814	0.00538483	0.521229	0.680917	343.374	344.089
AZGP1	870017	7	99412319	CGCTCAGTGTTGATGGGCTATTTGCAGAGAGACCCTCCGAATACAAAGCA	GeneID:563	NM_001185.2	99411623	-696	-0.159801	0.00134604	-0.171779	0.0295079	0.52427	0.684071	3301.93	1294.75
CLIC3	770091	9	139010829	CACCTTGACAAACAGCTGGAGCTTGGTCTCCGCCATGGTGGGAGCTGCCG	GeneID:9022	NM_004669.2	139010845	16	-0.159948	1.12814e-11	0.587184	0.344785	0.129792	0.28974	860.273	2594.79
IL8RA	3290528	2	218739143	CCTAGCATCCAGTCTTCATTCCATCCTGATTCTACCATTAATAAGTTTCG	GeneID:3577	NM_000634.2	218739961	818	-0.160574	5.26314e-06	0.0512305	0.00262456	0.36423	0.524804	605.947	805.471
TRIM31	4830465	6	30189387	CGGAGACACCAGCATACTGGAGACATACAGAGAAAAAATCAACAGAGGAC	GeneID:11074	NM_007028.3	30188846	-541	-0.160866	3.31078e-06	-0.105841	0.0112023	0.361808	0.522674	393.883	353.774
FCGR1A	2030161	1	148020624	CGGTAGAGGGTAAAAATAGAATAGAATGTCAATACAACTTTAGCCTTTTC	GeneID:2209	NM_000566.2	148020912	-288	-0.16087	2.09269e-06	0.0100999	0.000102008	0.378218	0.539088	372.285	400.245
CD300LB	2650753	17	70039981	CGCCTGTATTTGCATATTAAAAGGCTAGGGTAGGAAGGCTAGTTTTTTCG	GeneID:124599	NM_174892.1	70039200	-781	-0.160879	1.14459e-06	NA	NA	0.278998	0.439877	NA	NA
CEACAM4	2100735	19	46826318	CGTGGACCCTGGTCAGCATCCCTGGGGAAGCCCCTGACTTTTACCACAGG	GeneID:1089	NM_001817.2	46825282	-1036	-0.160944	1.38997e-05	0.274328	0.0752559	0.263553	0.424497	378.845	425.577
OR1A2	2360241	17	3047722	ACACTGACTGGAAATCTGCTCATCATCTTGGCCATCTGTGCTGACATTCG	GeneID:26189	NM_012352.1	3047563	159	-0.160986	8.68028e-06	-0.18093	0.0327356	0.41144	0.572427	323.924	310.609
HYAL4	4570026	7	123272134	CGGGAATCACCTTGTCTACTGGTTGCTAAGTCCTTGGGAAAAGCACTATT	GeneID:23553	NM_012269.1	123272459	-325	-0.160996	0.000588662	0.0193996	0.000376346	0.554008	0.715004	354.598	344.967
PATE	510431	11	125120598	CGTTGCAGCTTAGTCTTCATTGTCATTGTAGAGAACTGACAGAAGAGCTT	GeneID:160065	NM_138294.2	125121398	-800	-0.16116	3.81316e-06	0.156701	0.0245553	0.327961	0.489121	332.524	332.057
TAS2R1	3830703	5	9684216	CGAGACATTGCCAAATGTTCAAGAGTGGCAGAACCACTATGACGGGACAA	GeneID:50834	NM_019599.2	9683463	-753	-0.161225	0.000123474	-0.00572735	3.28025e-05	0.600749	0.761974	354.733	368.276
IGKV7-3	3390020	2	88996387	CGGTCCAAGCTTCTCAGAGCATCCTTAAAGACAGCTTGTCAGGGCCCCTG	GeneID:28905	ENST00000357453	88996309	-78	-0.161272	0.000282942	NA	NA	0.344996	0.506268	NA	NA
NRXN3	3830379	14	77939504	CGCATTCTGGGAATCTTAGGTCCATGTGACTTCCTGAGTCAGTGATTCAC	GeneID:9369	NM_004796.3	77939846	-342	-0.161311	4.59546e-05	-0.0220343	0.000485512	0.261352	0.422663	362.986	371.244
TLCD1	5490102	17	24076955	CGGGCTGAGGCCACGCAGTCTCACCTGATCCCGTTTGGTATCCTATCCAA	GeneID:116238	NM_138463.2	24077353	398	-0.161515	2.15243e-15	NA	NA	0.0870808	0.248596	NA	NA
C1QB	5570241	1	22857181	CGGGCCACCTTGCATGCTTAGAGCATCCCTGCATCTACTGTGATTCCTAC	GeneID:713	NM_000491.2	22858474	-1293	-0.161727	5.90352e-05	NA	NA	0.533952	0.695679	NA	NA
GPR62	3840184	3	51963494	CGACATTGGGGTGGGGAACCCTGACATTCACTGATTAGTCAAGACTGGGT	GeneID:118442	NM_080865.2	51964437	-943	-0.161771	4.08449e-06	0.0462312	0.00213733	0.347876	0.509647	326.416	331.838
SERPINB3	5860687	18	59480206	CGGGCTAACACTCACCTTTATGAATACGAAAATTTATGACAAAGGACAGG	GeneID:6317	NM_006919.1	59480094	-112	-0.161829	6.83286e-05	-0.235354	0.0553916	0.573147	0.734977	3694.7	563.587
CCL4	2450546	17	31455860	CGAGAAAGAAATCTAGAAGATTGGAACTGGATTCAGTCTCAGAACACATC	GeneID:6351	NM_002984.1	31455333	527	-0.162434	6.48267e-05	NA	NA	0.54521	0.707644	NA	NA
CST7	4050097	20	24877716	CGGTTGCTTTGTGGCTGATAGATCTGAAGGTGAAGAGCTTCTGGCCAAAA	GeneID:8530	NM_003650.2	24877866	-150	-0.162674	0.000253255	-0.293307	0.0860288	0.297766	0.46044	887.886	720.956
VHL	6200066	3	10159584	CGCCACACACGGTCGGCTCTTCCGGCGCCAACATGACCCTGGCTTGTTCC	GeneID:7428	NT_022517.17	NA	NA	-0.162974	0.000397019	-0.0269874	0.000728319	0.405727	0.568701	549.364	520.907
OR10J1	2070079	1	157675831	CGGTTTTATGAAGGCCTGAAAATGTGCACTCATCTCTGAAGAGTAGGAAA	GeneID:26476	NM_012351.1	157676173	-342	-0.163338	8.66249e-05	0.0365135	0.00133324	0.36295	0.526288	324.986	324.899
KRTAP20-2	4670368	21	30928577	GATTGCTTCCCAAATATATTTTCATAGTCTTTTTTTTACATTAAGACACG	GeneID:337976	NM_181616.1	30929454	-877	-0.163448	1.17262e-05	-0.0379354	0.00143909	0.371947	0.535394	330.354	317.318
PDILT	2060176	16	20323976	CGAGCAGCTCAGTACCTAGAAGGCAGGAGCCCCTCACGCATCACCACCCT	GeneID:204474	NM_174924.1	20323534	-442	-0.163497	3.50661e-05	NA	NA	0.455524	0.619021	NA	NA
IL17	2900008	6	52159276	CGGTCCAGAAATACTATCTGGTCCAAATCAGCAAGAGCATCGCACGTTAG	GeneID:3605	NM_002190.2	52159144	132	-0.163621	4.28301e-05	-0.0691102	0.00477622	0.555632	0.719253	336.513	321.175
FLJ32028	6770341	4	153821239	CGCCAGATGGAGGTGGATGCCACACCCACACCTTAAGGTTATGTTCTGCT	GeneID:201799	NM_152680.1	153820641	-598	-0.163882	6.97131e-06	-0.335439	0.11252	0.636559	0.800441	2098.6	1402.76
POLG2	160575	17	59924061	TTTACGGTGATTTGTAAGCCCAGGCCTTCTTAACTAGGCAAATGCTGCCG	GeneID:11232	NM_007215.2	59923631	-430	-0.164012	2.14751e-16	-0.166867	0.0278446	0.116015	0.280027	849.067	699.732
VHL	1450092	3	10159319	CGCCCGGCCCAGAGCATTCTTTATAAGGCCGAATAGTTTGCATTTGAAGG	GeneID:7428	NT_022517.17	NA	NA	-0.164033	0.000467469	-0.187664	0.0352178	0.49109	0.655123	549.364	520.907
SIRPB1	6900360	20	1548705	CCTGATTTCTGTTTCACAATCCAGAAGCAGGTTACTGCTTCACTCCATCG	GeneID:10326	NM_006065.1	1548630	-75	-0.164199	3.43816e-08	0.25688	0.0659872	0.269673	0.433872	374.352	499.926
ACSBG2	6250491	19	6086510	CATGCATCATTCATTTATTCATGCATGCATGCACTTCTGCGTTGCATTCG	GeneID:81616	NM_030924.2	6086678	-168	-0.164489	0.000633718	NA	NA	0.674252	0.838742	NA	NA
AIM2	4040674	1	157313597	CGACACCCTCAAGGGAGGAGTGCAGGCACTCAAAGATTTGAGTCACAGGC	GeneID:9447	NM_004833.1	157313271	-326	-0.164648	2.54005e-05	-0.460571	0.212126	0.222137	0.386785	2293.69	625.988
ATP6V0D2	5090519	8	87180271	CGGCCCCTGAAGATTTGCACTAGCCTGGGAAAAGTGCGAGTAATTATCAG	GeneID:245972	NM_152565.1	87180255	16	-0.164854	6.66422e-06	0.264158	0.0697794	0.398632	0.563486	359.394	398.335
CSPG3	6200630	19	19188990	CCAGCTTCTGCTGACAATGACTAAAAATAACCTCTTAGGTATCCTGTTCG	GeneID:1463	NM_004386.1	19188762	228	-0.165085	9.82553e-06	0.0926667	0.00858712	0.343589	0.508675	395.851	363.498
LILRA2	4060491	19	59776830	CGCAGGAGGGCACCAGTTCTATTTGCTGCTACATCCCAGGTCTCAAGGAG	GeneID:11027	NM_006866.1	59777071	-241	-0.165171	1.0837e-08	0.424931	0.180567	0.2161	0.381271	431.841	714.773
CCL8	4260762	17	29669861	CGCCCCGCCCACAGCCCCACTGTGTGTGAACCAAGAGAGTTGGAAGGCCT	GeneID:6355	NM_005623.2	29670179	-318	-0.165398	0.000305824	0.0867308	0.00752224	0.497814	0.663213	1852.39	1751.73
LCE1B	4880068	1	151050298	TAGGTCCCGTGACAGGTGGTAACTGGCAGCTCTGCACATGTCTGCCTTCG	GeneID:353132	NM_178349.1	151051071	-773	-0.165655	1.78641e-05	NA	NA	0.342361	0.508016	NA	NA
PRSS2	6380315	7	142178834	GAATCTACTTCTGATCCTTACCTTTGTTGCAGCTGCTGGTGAGTTTCACG	GeneID:5645	NM_002770.2	142178778	56	-0.165837	2.01549e-06	-0.0881186	0.00776489	0.52178	0.687617	510.395	333.684
IL21	2750500	4	123761648	CGAGACCAAGGTCTAGCTCTACTGTTGGTACTTATGAGATCCAGTCCTGG	GeneID:59067	NM_021803.1	123761662	14	-0.16614	2.6675e-07	-0.170839	0.0291859	0.340735	0.506875	313.431	304.458
HBB	7150072	11	5205142	CGTAAATACACTTGCAAAGGAGGATGTTTTTAGTAGCAATTTGTACTGAT	GeneID:3043	NM_000518.4	5204877	-265	-0.166557	0.000333878	NA	NA	0.534758	0.701314	NA	NA
INSL4	1470196	9	5221360	CGCAAAAGCTGAGTAATAGCCCTAAGCAAATAAATGCCTGATGAAGGCAT	GeneID:3641	NM_002195.1	5221419	-59	-0.16658	0.00203218	-0.00411385	1.69238e-05	0.642663	0.809243	324.518	316.915
CLEC7A	4540292	12	10173888	CGACTCTCAAAGCAATACCAGGATAGCTGTTGTTTCAGAGAAAGGTATAT	GeneID:64581	NM_022570.3	10174103	215	-0.167046	1.53082e-05	NA	NA	0.453651	0.620697	NA	NA
GPR109A	4290053	12	121753810	CCTGCAGATGGTGCCGATTCATGAGTGCGGCTAGTGAGTCCGATGGAGCG	GeneID:338442	NM_177551.3	121753857	47	-0.16714	0.00112796	NA	NA	0.648866	0.816006	NA	NA
KRTAP20-1	1690689	21	30909849	CGAAGCACACCTCAGGCAGAGAATGAGGAGTGGTAATGTCTTTATTGCAA	GeneID:337975	NM_181615.1	30910645	-796	-0.167228	7.94594e-06	-0.047056	0.00221426	0.464646	0.631874	316.759	319.499
GK2	5810246	4	80548412	CGGTCCCAGAGCTGCTGAGCCGACCTACTGGTGTCATGGCAGCCCCAAAG	GeneID:2712	NM_033214.2	80548396	-16	-0.167357	1.25004e-05	-0.276538	0.0764732	0.41072	0.578078	323.068	308.189
CEACAM19	2630035	19	49866521	CGCACCCAGCCTGCCTCAGAGCCTTCAAGTGAGTCAGCCACAGGTGAAAT	GeneID:56971	NM_020219.2	49866834	-313	-0.167762	0.000564233	NA	NA	0.603864	0.771626	NA	NA
OR5I1	5130689	11	55460019	CGGTTGATTGTCTTGTCATACCTTGGAGGCAACATGAGTTCCCTGGTTCA	GeneID:10798	NM_006637.1	55460452	433	-0.167932	0.000109586	0.00110601	1.22326e-06	0.611852	0.779784	324.654	325.385
CTLA4	7160470	2	204440719	CGAGAAAGGAAGCCGTGGGTTTAGCTGTTACGTCGAAAAGACAACCTCAA	GeneID:1493	NM_005214.2	204440756	-37	-0.167969	5.62002e-06	-0.476363	0.226922	0.507801	0.67577	1018.54	584.351
SLC24A2	3610240	9	19776543	TGTCTTTCGGGTAGTCTCCTTGGGCGTGATCTGTACTATTCTCAGACTCG	GeneID:25769	NM_020344.1	19776926	383	-0.168097	2.42106e-05	-0.30814	0.0949501	0.668902	0.836999	300.284	290.985
ANKMY2	670259	7	16653296	CGGGAATCAGTCATTTCTCCAGGGTGCAGATTTATATTTACATCATCAAT	GeneID:57037	NM_020319.1	16651923	-1373	-0.168188	3.45733e-09	NA	NA	0.192613	0.360801	NA	NA
F11R	7510541	1	159275268	CGGCCCCAGGAATCCCCCGCAGGTACCTCCAGCCATGGTGCGCGTAGCAA	GeneID:50848	NM_016946.3	159275358	90	-0.168232	9.75414e-14	0.0365867	0.00133859	0.103717	0.271949	389.802	404.349
MARCO	3370274	2	119416152	CGGGCTATTCACATGTGGATCTCCCACACAGTGCTGCTGCTTGTTAAGGG	GeneID:8685	NM_006770.3	119416215	-63	-0.168238	8.25737e-07	NA	NA	0.261603	0.429841	NA	NA
OR51B4	160601	11	5279552	CGGACCTTGGGATGACATTCACTACAATGCCCACAGTCCTGGGTGTCCTG	GeneID:79339	NM_033179.1	5279752	200	-0.168468	0.000193139	0.0479147	0.00229582	0.456402	0.62487	331.243	320.289
FLJ23657	5050612	4	76700323	AAGCAACATCAGGTTCAACGCAGTGACTGCTCAGTAGAAGCCATGGCTCG	GeneID:152816	NM_178497.2	76700282	41	-0.16854	3.4192e-05	-0.17114	0.029289	0.609626	0.778166	333.841	338.299
RPA3	7400133	7	7725520	AAACTGGAGCAATATAATTAGGGTAAGCCATTGCATCTGCACTTGTATCG	GeneID:6119	NM_002947.3	7724763	-757	-0.168639	8.60674e-07	NA	NA	0.379522	0.548161	NA	NA
ATIC	2650041	2	215885521	CGGTCAGGTTTCTTGCAAATTCCACAAGGCCGGTTTTGTCAGAGACACTA	GeneID:471	NM_004044.4	215885081	440	-0.168698	2.20025e-12	NA	NA	0.113042	0.28174	NA	NA
CLIC3	20035	9	139010879	CGGTCAGGCGCGGGTGGGGACCTGGGGAGCTCTTTAAGTCTCCCTGTGCG	GeneID:9022	NM_004669.2	139010845	-34	-0.169284	3.21519e-10	0.543496	0.295387	0.189448	0.358732	860.273	2594.79
RGS18	4280561	1	190394876	AATCTCTCCTGCTGACTACCAGAAAATTTTGTAGTTGGTAAAAACCCACG	GeneID:64407	NM_130782.2	190394215	661	-0.169361	1.7799e-07	0.301606	0.0909664	0.259731	0.429092	597.905	901.693
TSPAN32	2350332	11	2279317	TATTTTGTCGCAGAGCCTTCTTGGGGCCACAGGGGTGGGCTGGGGCCTCG	GeneID:10077	NM_139022.2	2279819	-502	-0.169522	2.32008e-05	NA	NA	0.314409	0.483931	NA	NA
NALP10	2060296	11	7941549	CCTCAGACAGGGTCATATCCCGTAAGTAGAACTTTAACTTCTTGAAATCG	GeneID:338322	NM_176821.2	7941624	75	-0.16973	2.22148e-06	0.14175	0.020093	0.444735	0.614464	274.658	289.376
KLK2	990440	19	56067705	CGCTTCTATTTCAGGAACATGGTAAGTTGGAGGTCCAGCTTCTGGGCTCA	GeneID:3817	NM_005551.3	56068501	-796	-0.169812	1.64396e-06	-0.0807143	0.00651479	0.369681	0.539494	346.577	351.703
IL1F9	6380360	2	113451848	CAAGTATCACCTGTCCGGGCTCGCTGAGAAATAAGTGTTGAGCCAATCCG	GeneID:56300	NM_019618.2	113452077	-229	-0.169865	0.000174256	-0.134784	0.0181667	0.530138	0.700002	842.471	329.146
OR12D3	7400630	6	29450501	CGGCTTGACATCGTAGAAGAAGTGATTGAGTTTCTGAGAGCCACAAAAAC	GeneID:81797	NM_030959.2	29451047	546	-0.169878	4.17463e-05	0.0652738	0.00426067	0.431622	0.601499	335.33	328.149
DEFB119	3390403	20	29441837	CGGGAAGCCCATGACCAGGAACCCAGACCCCCGAGAGAGGTTCACGTTAC	GeneID:245932	NM_153289.2	29442067	230	-0.170059	0.000212214	-0.0510848	0.00260966	0.423503	0.593563	299.042	297.517
KRTAP8-1	6520482	21	31107236	TCGGCTATGGCTACAACGGCTGTGGGGCTTTCGGCTACAGGAGATACTCG	GeneID:337879	NM_175857.3	31107441	205	-0.170157	6.8944e-05	-0.101565	0.0103155	0.714456	0.884613	303.56	303.119
FCN2	7100475	9	136911327	CGGAACCCGAGGGGGGTCTTAACTAGTCATAGTCTCAGGACCACACATCT	GeneID:2220	NM_004108.2	136912479	-1152	-0.170265	1.1158e-05	0.158413	0.0250946	0.671333	0.841598	306.75	317.151
CD1B	6900348	1	156567662	CTTTCCTAGGTGCAATTGGACACTAAGGGTCTGGGTCTTTCTGTCTCCCG	GeneID:910	NM_001764.1	156567882	220	-0.170379	0.000624097	0.319942	0.102363	0.552057	0.722436	392.853	563.154
LY96	4860161	8	75066355	AACTCATCCGATGCAAGTATTTCATACACCTACTGTGGTAAGTAAAACCG	GeneID:23643	NM_015364.2	75066144	211	-0.170547	0.000100034	NA	NA	0.295578	0.466125	NA	NA
GRM8	3710398	7	126670876	GGTTCAGTTCAGTGGGTCTACATGTTTCACATTTTGCAGCCCTGTTTACG	GeneID:2918	NM_000845.1	126670548	-328	-0.170596	4.66342e-05	0.168051	0.0282411	0.503316	0.673911	1112.71	383.599
EIF4E	130634	4	100070234	ACTATGACTCTTGACGTTGACTCATTCTCCTTAGGCGAGTGACTTAATCG	GeneID:1977	NM_001968.2	100070139	-95	-0.170813	6.17623e-13	NA	NA	0.123955	0.294767	NA	NA
SYN3	5260403	22	31732393	CGCCCATTGTTCAAAGACCCAGGATCCTGTTGGTGATCGATGATGCCCAT	GeneID:8224	NM_003490.2	31732683	290	-0.171138	1.27832e-05	0.0297417	0.000884571	0.641606	0.812744	293.809	302.078
C14orf93	4560093	14	22548810	CGGGCTGAAGGGATAATGTAAATTTCTGCCACAGGCAACATCGAAGGAAG	GeneID:60686	NM_021944.1	22549192	382	-0.171138	2.51864e-06	-0.0116589	0.000135929	0.270433	0.441571	1090.86	1041.09
GPR109B	6580288	12	121767629	CGGTGAATTAATTCTGCAACGTTGAGTACTCAGTTGGCATACAAGCACCC	GeneID:8843	NM_006018.1	121767297	-332	-0.171504	0.000457194	NA	NA	0.409364	0.580868	NA	NA
SERPINB5	5390528	18	59295157	CGGTGGCTCACCTGGGCAGCACCGCCACGCCCACTGCCAGCCCAGCTCCA	GeneID:5268	NM_002639.2	59295199	-42	-0.171675	0.00965186	-0.280006	0.0784032	0.600171	0.771846	6774	427.516
OR2C3	4570746	1	245763251	CGGACAAGAAGGCAGGAGAAAGAGAAACTTTTGCTTCTGAAGCCTTCATG	GeneID:81472	NM_198074.3	245763764	513	-0.171896	5.38667e-05	0.209672	0.0439622	0.552046	0.723942	304.06	299.499
CLDN8	5090348	21	30509994	CACTGTCATGCCTCAGTGGAGAGTGTCGGCCTTCATTGAAAACAACATCG	GeneID:9073	NM_199328.1	30510189	195	-0.172348	0.00048216	-0.274767	0.075497	0.655072	0.82742	1579.7	453.714
TNFRSF10A	4590167	8	23139298	CGGTGGAGTTGAGGTGACATTTCACTGGCATGGAGACCTGAAACCAAAAG	GeneID:8797	NM_003844.2	23138584	-714	-0.173196	7.22945e-05	-0.290559	0.0844244	0.569698	0.742893	886.253	880.761
LCP1	4880634	13	45654210	CGCTTGTGATGCACTTCGGCACTGTTTCTGTGGATTGTGGGTTTTGCCTT	GeneID:3936	NM_002298.2	45654395	185	-0.173651	3.94597e-05	NA	NA	0.306359	0.480009	NA	NA
PTPRD	2360608	9	9009757	CGTTGAGAAAGATACAAGTCCATGAAAGTGTTGTAGTGTTTCGGGAGTTT	GeneID:5789	NM_130391.1	9008735	-1022	-0.173786	0.000153462	0.108539	0.0117808	0.615377	0.789163	364.886	389.211
ELA2	6380612	19	802650	CGCTCGGTTAAATCTGAATTTCGGGTAAGTATATCCTGGGCCTCATTTGG	GeneID:1991	NM_001972.2	803291	-641	-0.173845	7.9202e-07	NA	NA	0.355264	0.529109	NA	NA
CD1C	3840593	1	156526550	GCTAGCTCTTCTTCTCCCAGGTGGTGACAATGCAGACGGTAAGAACATCG	GeneID:911	NM_001765.1	156526428	122	-0.175012	4.28374e-06	0.488906	0.239029	0.512863	0.687875	423.068	730.422
HEPH	7560678	X	65299801	CGCCCCACTTGCTCTAGGAGTAATCAGCTATGTGGATTTTGTGGATTTGG	GeneID:9843	NM_014799.2	65299388	413	-0.17537	0.000476546	-0.29079	0.084559	0.579841	0.755211	322.506	323.701
EDA2R	7650639	X	65752717	CACATGGTCAGAGCTACATAAGCATTAACTCTTTTGTGTTGGCTTCCTCG	GeneID:60401	NM_021783.2	65752598	-119	-0.175418	4.8285e-05	NA	NA	0.439504	0.614922	NA	NA
FCER1A	3060019	1	157525501	AATAACATGTCTTCCCCAAGTCACTTCTAACAAATATCCCATGGTTATCG	GeneID:2205	NM_002001.2	157526128	-627	-0.175781	0.000927441	0.33029	0.109092	0.606972	0.782753	604.214	1900.57
CCL15	2060082	17	31354012	GGAAGGTCTTCTAGCCTCTAATCTTGAGATTTTCCAGTTCTCCATTTTCG	GeneID:6359	NM_032964.2	31353125	-887	-0.175852	1.03761e-06	0.189675	0.0359765	0.450496	0.626348	294.998	302.348
LOC196264	4590356	11	117627925	TTTGTGGTTCCATCAAGTATGCTATCACCAAACTACAATGACAGGTCACG	GeneID:196264	NM_198275.1	117628221	296	-0.175978	3.63711e-16	-0.213886	0.0457472	0.110919	0.286897	458.404	452.135
C14orf166B	7650338	14	76362378	ATGCAGTCATTGTGATTCACATGGTGGACCTGGCAACAGCAGGCTTCCCG	GeneID:145497	NM_194287.1	76362480	-102	-0.177136	3.81316e-06	NA	NA	0.545008	0.722144	NA	NA
NALP8	1980068	19	61151046	ATGTCTCTGCAGGTCTCGTGTTTCTCTCTTCCAATCGGTTGTCTTTATCG	GeneID:126205	NM_176811.2	61151010	36	-0.177281	0.000520115	-0.115475	0.0133346	0.640348	0.817629	315.941	329.899
BRS3	650224	X	135397854	CGAGATGGTATTAGGAGAACAGAACAGAACAGAATGGGAAGAAAATCCAA	GeneID:680	NM_001727.1	135397791	63	-0.177525	0.000165416	-0.0828961	0.00687177	0.506599	0.684124	314.484	316.169
TAS2R60	3710131	7	142850796	CGCCCAGAGCAGCAGTGATGAAGCCATTGCCTGCTATTGCTACCAGGCGT	GeneID:338398	NM_177437.1	142850668	128	-0.178566	0.000378432	-0.187986	0.0353386	0.574058	0.752624	326.532	305.812
TTC15	2350184	2	3362264	CTAGGATATGCTGGTCAATAAAAATAGCCTAAGCGACTCCCTTTCACCCG	GeneID:51112	NM_016030.5	3362453	-189	-0.17883	4.89165e-12	NA	NA	0.219403	0.398233	NA	NA
REGL	60706	2	79236421	AGACACAAGTTCTGGATTTTCCCAGTTCCAGGCGAGGCTCTGTGGACTCG	GeneID:5969	XR_000606.1	79236690	269	-0.179054	2.09471e-06	-0.00740164	5.47843e-05	0.602306	0.781361	335.258	340.719
CTSG	5910619	14	24114868	CGTGGGACTGGTGTTTAAAAATCTAGACATGAGCTGATGGTACTGTTATT	GeneID:1511	NM_001911.2	24115306	438	-0.179099	5.58714e-06	0.252729	0.0638719	0.412247	0.591346	718.759	855.972
NIPSNAP1	5490594	22	28307742	CTCTGCATGAATTAAACTCTTATTGCAATTCCTCTGTCTTGATAAATCCG	GeneID:8508	NM_003634.1	28307328	-414	-0.180022	0.00135386	-0.579943	0.336334	0.546658	0.72668	2272.84	1156.23
FLJ46365	7610228	8	49665520	AAAGCAAGAAGCACAATAATTCCCCCTTCCGTTGTGTTCAATAGTGAACG	GeneID:401459	NM_207504.1	49665514	6	-0.180554	2.32008e-05	NA	NA	0.432603	0.613157	NA	NA
FLJ46365	20390	8	49665263	CGCCGCTTTTAACCACAGAGATGACTCAGCACTGGAAGGTTAGCTGTGCT	GeneID:401459	NM_207504.1	49665514	-251	-0.1809	4.377e-05	NA	NA	0.338313	0.519213	NA	NA
GABRA5	3780343	15	24741904	CGGGGAGATCTGGTGCTATAACCATCTCAGTTTACAAAGAAGAAAAGTGA	GeneID:2558	NM_000810.2	24742696	-792	-0.18101	1.75323e-06	-0.0431192	0.00185926	0.422779	0.603789	357.703	350.586
PLCL1	2510333	2	198523309	CGAGAGACCCCCAGCTGTGGAACTGAAGAACTGGTCTCCCACAAAGCTGA	GeneID:5334	NM_006226.1	198523731	-422	-0.181149	3.0706e-05	0.356924	0.127395	0.624796	0.805945	413.303	491.827
GRAP2	2480072	22	38626982	CGCCCAACTCTCCGAAGCCCCATATGTGCTAGTTCCTGTGTGGTTTGCCT	GeneID:9402	NM_004810.2	38627032	-50	-0.181374	5.00324e-05	-0.00172246	2.96687e-06	0.310161	0.491535	350.013	367.595
OR2F1	7550181	7	143288110	CGGTCACCACATACATGACCAAGAACAGGACAAACAGGGAGACCCGAGTG	GeneID:26211	NM_012369.1	143287997	113	-0.181506	3.14047e-05	0.112276	0.0126059	0.63701	0.818516	380.756	378.185
PLUNC	4220224	20	31287206	TACTCAAGACTTTATGGTTTCCTGAGCGGAGCCAAGGTTGGGGACCCACG	GeneID:51297	NM_016583.2	31287463	-257	-0.181524	3.27971e-05	-0.0570754	0.0032576	0.506405	0.687929	6511.1	1120.7
ATXN3	1470414	14	91643163	ACCCAGCACTTGTATAAAAATGATAGCTAGGCCGGGCGAGGTGCTTCACG	GeneID:4287	NM_004993.3	91642707	-456	-0.182846	0.000492362	NA	NA	0.674543	0.857389	NA	NA
CNGA2	3440431	X	150653867	CGAAGGGAGTAGACTCTATTATTTCAAGAAAGATGGCGTGGATAAACTGT	GeneID:1260	NM_005140.1	150653874	-7	-0.183012	1.06066e-05	0.0027784	7.71949e-06	0.295889	0.478901	303.787	306.024
ZMYND10	650403	3	50358083	GATCCTGGGCAGCAGCCGGGGTGGGGATGCTGTCACATTCGGGGACGACG	GeneID:51364	NM_015896.2	50358160	77	-0.183555	0.000124705	0.0546127	0.00298255	0.183593	0.367148	610.206	1091.57
PTPN6	1500064	12	6926269	CGGCAGATCGCACTCACGTTCACACACGTCGGAGTGAGCATCAACAAAGC	GeneID:5777	NM_002831.3	6926001	268	-0.183678	4.70601e-05	-0.196965	0.0387952	0.320025	0.503703	384.64	342.794
MMP26	5820615	11	4965887	CGCCACTCACAGATTCAAAGAAAGGGCAAACTGGCAGAGTGAGTCATTGG	GeneID:56547	NM_021801.3	4966000	-113	-0.184203	0.000102481	0.241279	0.0582155	0.591842	0.776045	332.146	327.077
CIITA	5390563	16	10878692	CCTTGGGGCTCTGACAGGTAGGACCCAGCAGGGCGTGGAGCCAGGCAACG	GeneID:4261	NM_000246.2	10878558	134	-0.184906	4.87479e-06	NA	NA	0.354361	0.539267	NA	NA
SERPINB5	6220136	18	59295319	CGTTATTTGAGCTGATTTGAGATGGTGAACAAAATGGACTTAGGTCCATT	GeneID:5268	NM_002639.2	59295199	120	-0.184915	1.25004e-05	-0.404731	0.163807	0.566768	0.751683	6774	427.516
UNQ9438	1980014	14	57932850	AGGGCACGCAGGTGCAGTGCTTTCGATCCGCACAGGTAGCTCAGTAGACG	GeneID:387990	NM_207377.1	57932385	465	-0.185342	7.55845e-17	NA	NA	0.121733	0.307075	NA	NA
REG3G	5390021	2	79105419	CTTAACATCAATCAAGGCAGTGGCACCAAATTGCATTGCTCATATCCACG	GeneID:130120	NM_001008387.1	79106334	-915	-0.185406	5.72497e-06	NA	NA	0.435116	0.620522	NA	NA
PRKCBP1	6760100	20	45418746	CTCTGGGGGTGAGTGTGGCACGGCCAGCCACAGAGAAATCACACTGCTCG	GeneID:23613	NM_183047.1	45418881	135	-0.185439	1.51971e-12	0.0488412	0.00238546	0.161881	0.347321	401.031	388.412
C1orf150	6560646	1	245778860	TAGATTCACTTTCATGTTTCAGCCTGATTTTTTCCCACTGTATGCCCACG	GeneID:148823	NM_145278.1	245779072	-212	-0.186076	2.09018e-05	NA	NA	0.320482	0.506558	NA	NA
CHRNA6	2940053	8	42743103	CGGTTGAGATTGCACCACAGAAAGATCTCAGCCACTCACAGGTGTTCATC	GeneID:8973	NM_004198.2	42742776	-327	-0.186176	4.97697e-06	-0.331131	0.109648	0.262607	0.448783	365.213	326.768
OR1G1	5420239	17	2976935	CGTTCGTGTAAGAGATAATCAGGCAAAGCACACAAATGAGTCCTGTGAGA	GeneID:8390	NM_003555.1	2977595	660	-0.186676	4.56077e-05	-0.0954229	0.00910553	0.441452	0.628127	319.744	321.715
DAPP1	2230300	4	100956844	TCCAATCCCAGGTGGGGTGGTTGCCTCTTCATTTCCTTTGATAGCAACCG	GeneID:27071	NM_014395.1	100957013	-169	-0.187223	9.47461e-06	NA	NA	0.275811	0.463033	NA	NA
PFTK1	7100368	7	90176491	TTTCAGCCACCATCATGCATGCTGCAAAAGCTGCTAAAATGGTGTCTACG	GeneID:5218	NM_012395.2	90176648	-157	-0.187493	1.21655e-06	0.0368629	0.00135887	0.363682	0.551175	1478.25	1426.96
CORO6	730356	17	24968579	CGCCCCCCACCCGCAGGGCATGCCCACCTGGACAGGACTGAAGGCTGCTG	GeneID:84940	NM_032854.1	24968613	34	-0.187791	1.54021e-11	NA	NA	0.0859901	0.273781	NA	NA
ERAF	6580333	16	31446735	CGCACCCTCAAGAGTGTGGGTGAGACATATACAGCCTGTTAGACCTGAAG	GeneID:51327	NM_016633.2	31446704	31	-0.187916	3.58836e-06	0.25293	0.0639738	0.574831	0.762748	366.261	396.393
C10orf81	5670608	10	115501494	AAGTCCAAACCAGATACACCAAGCAGTACTTACTGGAAGCCAAGAGGTCG	GeneID:79949	NM_024889.3	115501203	291	-0.188864	5.02307e-06	NA	NA	0.458256	0.64712	NA	NA
LOC116123	3400376	1	164839340	CGCCCAGAATAGGTACCATGTCACAACTTGTATTAAGAGAACAGTTAGGC	GeneID:116123	NM_138784.1	164839777	-437	-0.18929	0.00168861	-0.0788335	0.00621472	0.581915	0.771205	406.492	303.456
REG1A	4290296	2	79201207	CGGGAAGATACAGCATGAGTTTCTGTCCAAGAGGTTTTAGCTGTAATGAA	GeneID:5967	NM_002909.3	79201092	115	-0.189556	4.08492e-05	0.0268944	0.000723311	0.64408	0.833635	348.666	326.573
OR12D2	4050349	6	29472533	TCTCCTCTTGGGAGTGACAGACATTCAAGAACTGCAGCCTTTTCTCTTCG	GeneID:26529	NM_013936.2	29472456	77	-0.190078	9.42995e-07	0.18235	0.0332517	0.327139	0.517217	327.694	328.783
RUNX1	4060551	21	35343342	GTGGTCAGCAGGCAGGACGAATCACACTGAATGCAAACCACAGGGTTTCG	GeneID:861	NM_001754.3	35343465	123	-0.191332	0.000796432	NA	NA	0.291756	0.483088	NA	NA
EBI3	6040386	19	4180887	CGCATGTCTGTGTAGCTATGTCTGTGTAGCTCTATGGATACCTCTGAGCT	GeneID:10148	NM_005755.2	4180540	347	-0.191599	5.15016e-08	0.156619	0.0245294	0.387983	0.579582	391.695	373.911
FCRL3	160392	1	155937334	CGCTCATTAAGCTTGCCTACATTAGGAGCTGCATGCAGAACCAAAGGCTG	GeneID:115352	NM_052939.3	155937271	-63	-0.192778	9.00851e-06	NA	NA	0.419321	0.6121	NA	NA
FCRL2	3450349	1	156013554	TCCTTTTTTGCTAATTATACAAAACCTATTCTGAAAACCACATTTCATCG	GeneID:79368	NM_030764.2	156013533	-21	-0.192801	4.66987e-06	NA	NA	0.350018	0.542819	NA	NA
REG3A	4280440	2	79240228	CGGGGATGGGAGAGTACACAGATTCACAACTCATTCAGAACTGTAGAAGA	GeneID:5068	NM_138937.1	79240387	159	-0.193072	2.51864e-06	NA	NA	0.400466	0.593538	NA	NA
REG1B	1010594	2	79169512	GCTAGCTACTTATGCTGAAACCTTGCTGGAAACGCTGGCTTAAATTTACG	GeneID:5968	NM_006507.2	79168627	-885	-0.193496	6.40946e-05	-0.297162	0.088305	0.619708	0.813204	340.969	338.952
TMEM116	3120026	12	110936807	CCCCCTTCCATTTTTGCAGAATTAGGGATCCTGGCCTGAGTAAATGGACG	GeneID:89894	NM_138341.1	110935318	-1489	-0.193948	7.61957e-07	NA	NA	0.308458	0.502405	NA	NA
SERPINB5	5080010	18	59295230	CGCATTTTCCAGGATAACTGTGACTCCAGGTAAGCAAGGTGGGGTAGCAG	GeneID:5268	NM_002639.2	59295199	31	-0.194696	1.95694e-05	-0.344223	0.118489	0.560585	0.755281	6774	427.516
DLC1	7560382	8	13417461	CGCTGCCATGCTAGATGGAAGCAGTTGTAAGTGTTTAATGTCAGCAAGAC	GeneID:10395	NM_182643.1	13416766	-695	-0.194912	3.20422e-11	-0.13746	0.0188952	0.262137	0.457049	425.079	398.847
FLJ43806	510754	1	15300241	GTTCCCTTCCGTTTGTTTCTCTGTTGATCCCTTTCTGTTCTTGAGTCTCG	GeneID:399563	NM_201628.1	15300684	-443	-0.195503	1.90331e-07	0.566169	0.320548	0.274968	0.470471	345.907	383.565
REG3G	1240735	2	79106718	CGCAGACACTATGCTGCCTCCCATGGCCCTGCCCAGTGTGTCCTGGATGC	GeneID:130120	NM_001008387.1	79106334	384	-0.196831	1.4404e-05	NA	NA	0.547787	0.744619	NA	NA
COL17A1	990369	10	105835992	CGTGCCTAGACTCATGAATCATGCAGTGGGATTCCAGTACCCATGGCACT	GeneID:1308	NM_000494.2	105835628	-364	-0.196915	2.97811e-07	-0.377476	0.142489	0.519024	0.71594	1792.89	386.813
MX2	4640187	21	41656136	CTGGGGACAGGGTGGCCTCCATCCTGATCTGGCCAAAAGTCGGGTGGACG	GeneID:4600	NM_002463.1	41655820	316	-0.197205	2.70537e-05	-0.366502	0.134324	0.238963	0.436168	1945.65	1378.84
SYTL1	5870427	1	27541197	GGCACCGACACGTGTTACCTGTAGGGGTCCAGTATGGGAGGACACCTTCG	GeneID:84958	NM_032872.1	27541100	97	-0.197709	3.51021e-12	NA	NA	0.142025	0.339734	NA	NA
PTPN22	3060075	1	114215863	CGGCAGCAGTGGCTTTTTGGAGGTGTCTCGGCCATGACACACATTTGACA	GeneID:26191	NM_012411.2	114215857	-6	-0.197928	0.000362843	-0.0431672	0.00186341	0.357568	0.555496	487.77	532.351
C8ORFK32	7650358	8	139233817	CGGAGCTTGGCTCACTCTCAATGCCTGAATCAGATATGATGGATGAAGAT	GeneID:51059	NM_015912.2	139233829	12	-0.199036	0.00020452	NA	NA	0.59658	0.795616	NA	NA
C1orf150	3390546	1	245779214	CGCATTTGTAATGGTGAGGTACATTGTGCTTCTAGAAGGTTAAGCCTGAA	GeneID:148823	NM_145278.1	245779072	142	-0.199296	2.84913e-06	NA	NA	0.314919	0.514215	NA	NA
KSR1	240255	17	22823100	CGGTGAAGGCTGACAGCACAGAGCACAGTTCCGTGCAAATCAAGACACAT	GeneID:8844	NM_014238.1	22823163	-63	-0.200647	2.40701e-06	NA	NA	0.434727	0.635373	NA	NA
TRHR	6520431	8	110168926	CGAGACAGTCAGTGAACTGAACCAAACACAGCTTCAGCCACGAGCAGTGG	GeneID:7201	NM_003301.1	110168900	26	-0.200676	0.000461652	0.0769331	0.0059187	0.512894	0.71357	298.051	309.793
ARPP-21	5310156	3	35658819	CACTGCTCTGTCTTCCCTCATGCTTCTTTTATTGCTGAGTGAGGCGCTCG	GeneID:10777	NM_198399.1	35658853	-34	-0.203414	7.0846e-06	-0.0886113	0.00785196	0.556127	0.759541	345.264	339.924
DEGS1	6480376	1	222436778	CGCGTGCACAGCATGTTCTTTGACTAGGAGGCACACCTGCTTTGGTTATC	GeneID:8560	NM_144780.1	222437551	-773	-0.203471	6.65034e-06	NA	NA	0.296977	0.500448	NA	NA
TRY1	6380497	7	141604179	TATTGGGGACCAATCACTTGACTCTATTCTTGTCTCTCTGACAGATGACG	GeneID:136541	NM_001001317.1	141604347	168	-0.204291	2.5747e-05	NA	NA	0.559577	0.763868	NA	NA
TCN1	1580292	11	59390794	CGGAAGGCAAATAATAGATATGAAACCCGAAGGTTTAGGACAGGAGACAA	GeneID:6947	NM_001062.2	59390594	-200	-0.204896	4.11308e-08	0.000970298	9.41478e-07	0.319311	0.524207	2317.59	352.205
KRTAP13-1	5220711	21	30690182	CGGCTGAACGTATATAAATGGTCCTGTCCAGATGTGGCATGCAAACTCAG	GeneID:140258	NM_181599.1	30690213	-31	-0.205112	3.55134e-07	-0.195726	0.0383088	0.401646	0.606758	312.114	298.066
IGKV7-3	3710739	2	88996300	CAGGGCCCCTGAGGAGCAGCCTCTAGTTCAGCTCTCAGAGATAGGGTCCG	GeneID:28905	ENST00000357453	88996309	9	-0.206746	1.06535e-05	NA	NA	0.582733	0.789479	NA	NA
CORO6	2810482	17	24968711	CGCCAGGGCCATATCTTCACCACGGGCTTCACCCGCATGAGCCAGCGAGA	GeneID:84940	NM_032854.1	24968613	-98	-0.209607	4.95885e-06	NA	NA	0.251493	0.461099	NA	NA
CD300E	2650246	17	70131151	CGGATCCTACAAACACTTACTGAGCACCAGATATGTGCCAGGACTGTTCT	GeneID:342510	NM_181449.1	70131396	245	-0.210003	2.27235e-07	NA	NA	0.410026	0.620029	NA	NA
DEFB118	4670332	20	29420246	CGGTACTCCCCAACATGGGCAGCTCCACAGTTCCCACACTGGGACTATGC	GeneID:117285	NM_054112.1	29420089	157	-0.21001	5.48059e-06	-0.209126	0.0437339	0.470867	0.680877	330.802	328.431
MAGEB6	1030240	X	26120633	CGGCTCCACAGAGCCCTGCCCCAACCTGCCCCGACCTGGTCCCTGAGGAG	GeneID:158809	NM_173523.2	26120478	155	-0.21118	7.66483e-05	-0.127683	0.016303	0.53235	0.74353	354.342	349.122
PTPN22	380630	1	114215835	TTCAGCATGCTCTGCTCAGGCGGCAGCAGTGGCTTTTTGGAGGTGTCTCG	GeneID:26191	NM_012411.2	114215857	22	-0.211677	6.67556e-05	-0.0742098	0.00550709	0.381702	0.593379	664.903	809.038
UNQ467	4730202	19	40673517	CGAAAAGAGACAAAGACAAAAGGAGAGGTTGCTTGGGTACCACTGCCAAT	GeneID:388533	NM_207392.1	40673196	-321	-0.213038	1.26126e-05	NA	NA	0.425802	0.63884	NA	NA
ADA	4060615	20	42713207	CTGTGCCCGGCGCCTACTGAGTGCTCAGTGAATGGAAGCAGCTTTGTACG	GeneID:100	NM_000022.2	42713790	583	-0.213041	7.57145e-09	-0.60334	0.364019	0.353825	0.566867	1792.22	890.402
CDH18	4250451	5	20017186	AGGAAAAATCCAAAGTTCTTAAACAGATCTACAGGATCTACACATGATCG	GeneID:1016	NM_004934.2	20017046	-140	-0.214357	2.13888e-05	-0.293595	0.0861981	0.547148	0.761505	302.305	288.809
FTH1	6860132	11	61492493	CGTGGATCTAAAGGCGAAGCCCATGCTGAGGACTTTTCAAAATGGCCTCT	GeneID:2495	NM_002032.2	61491708	-785	-0.215128	4.06382e-09	NA	NA	0.166406	0.381533	NA	NA
HMGCL	5860035	1	24025361	CGGTGTAGCATTCGCAATGGCCCTGAGGCAAAGAAAATGCTGAGAACACT	GeneID:3155	NM_000191.2	24024536	-825	-0.215291	6.76054e-07	0.223263	0.0498465	0.623325	0.838616	606.576	675.986
REG3A	6110372	2	79240781	CGGGAATTATAAGTATCATGGACAGTTGAGGACATAGATGGTACTGAAGC	GeneID:5068	NM_138937.1	79240387	-394	-0.216603	8.96941e-06	NA	NA	0.561619	0.778222	NA	NA
RNASE3	5490630	14	20429783	CGAGGGCTCAGTGGTTTGCCATCCAGCACATCAGTCTGAACCCCCCTCGA	GeneID:6037	NM_002935.2	20429402	381	-0.219259	7.3378e-10	0.137768	0.0189799	0.329072	0.548331	365.199	367.538
C8ORFK32	610341	8	139234234	CGTCAATGTAGGTCAGCACTGGGGCCTGTCCATCCTCTGGACCTGGACTC	GeneID:51059	NM_015912.2	139233829	-405	-0.22183	5.18477e-06	NA	NA	0.506916	0.728746	NA	NA
MNDA	3930112	1	157066559	CGACAGGAGTTACCATGTTTCAGGACAGCTTTCTGCCCTGATATGGTTTG	GeneID:4332	NM_002432.1	157067792	-1233	-0.224603	5.62002e-06	0.605177	0.366239	0.483251	0.707854	2108.71	6043.7
DPP6	3990523	7	154059965	CGGGATATGCATCTTTTGGTTTCAAGAGAGTAGTCAACAAGAACTTACTG	GeneID:1804	NM_001936.2	154060464	-499	-0.226739	3.31642e-07	-0.299847	0.0899085	0.465461	0.692201	336.865	331.681
TMC6	10239	17	73640076	AAGCTTGCGGTGAGCAGCAGGCTCAGCAGGTTGAGTAGCAGCAGGAAGCG	GeneID:11322	NM_007267.5	73640083	7	-0.227504	7.94003e-10	NA	NA	0.2805	0.508005	NA	NA
NXF2	6960471	X	101365619	GGTGCTATACCAAGGCTACCTGAACCTCCTCCTCTGGGATCTTGAAAACG	GeneID:56001	NM_022053.1	101365595	24	-0.230187	9.18556e-07	-0.0654536	0.00428417	0.380004	0.61019	354.639	357.856
KRTAP11-1	5220619	21	31175631	ACTGGGCAAACAGATGCCGCCCAGGCAGTCAGCATCAGTGGTGGAAGTCG	GeneID:337880	NM_175858.2	31175745	114	-0.232976	4.81072e-08	-0.0215549	0.000464612	0.472298	0.705274	665.826	644.604
AIP	2230671	11	67006628	CGGGGTCGGAAATGAGTCATAGTTGTGCCCAATTAATATTAGGGAATAAT	GeneID:9049	NM_003977.1	67007097	-469	-0.236476	4.28122e-13	0.0838515	0.00703107	0.210391	0.446867	1418.76	1413.28
LY6K	6290201	8	143778399	CAGGCAGGGGCCTTACTAGTAAGCACGTTTTGGGAAGTCCTCAGGGCACG	GeneID:54742	NM_017527.2	143778533	-134	-0.244489	1.59111e-12	NA	NA	0.208146	0.452636	NA	NA
CASP8	4220095	2	201807196	TCTAGACACCAGTGGGCCGAGTGGAGCAGATGCCAGTTGGGACCTTCCCG	GeneID:841	NM_001228.3	201806426	770	-0.251804	1.39053e-09	0.0176097	0.000310103	0.305016	0.556819	331.143	333.499
TRIM15	630382	6	30238980	CGCCTCAGAGCCAGAAGTTTATGGCTCCCACCTGCTCAATCTGACAGGAA	GeneID:89870	NM_033229.1	30238970	10	-0.287156	2.27074e-11	-0.165004	0.0272262	0.310464	0.597621	360.986	309.204
